# Supplementary material
Source: PubMed Central journal article supplement (PMC6063489)
Supplement: jci-128-94287-s203.pdf [file jci-128-94287-s203.pdf]

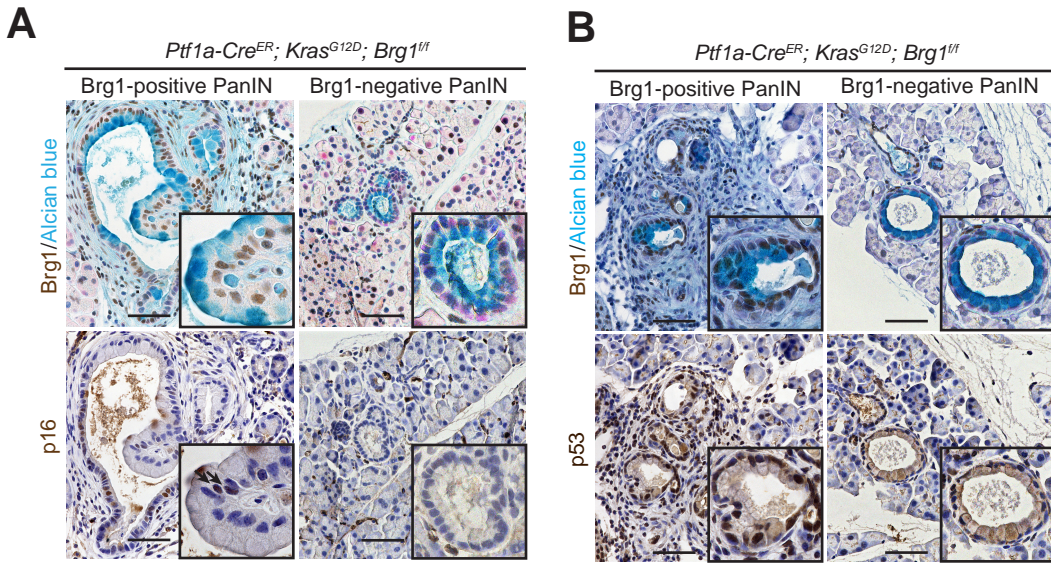

**Supplemental Figure 1. The tumor suppressor genes p16 and p53 are down-regulated in BRG1-depleted PanINs. (A)** Immunohistochemistry of serial sections for BRG1 and p16 in *Ptf1a-Cre<sup>ER</sup>; Kras<sup>G12D</sup>; Brg1<sup>fl</sup>* mice. Arrowheads indicated p16-positive cells. Scale bars: 50 $\mu$ m. **(B)** Immunohistochemistry of serial sections for BRG1 and p53 in *Ptf1a-Cre<sup>ER</sup>; Kras<sup>G12D</sup>; Brg1<sup>fl</sup>* mice. Scale bars: 50 $\mu$ m.

**A**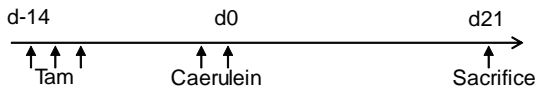**B**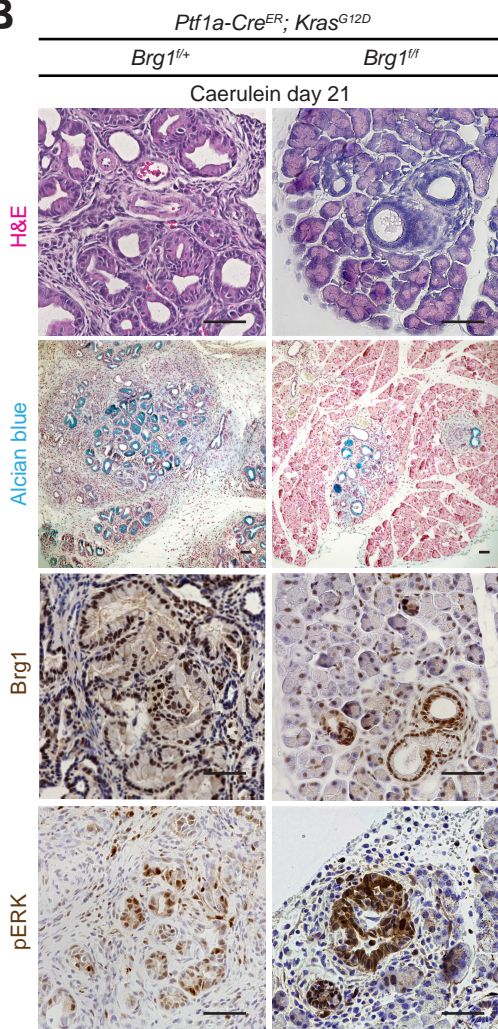**C**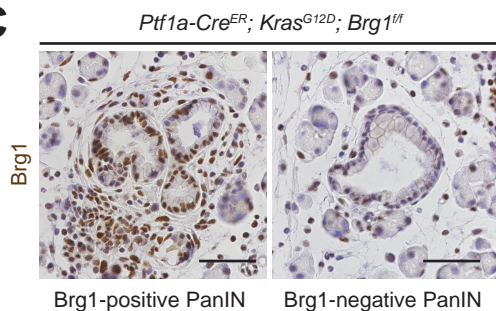**D**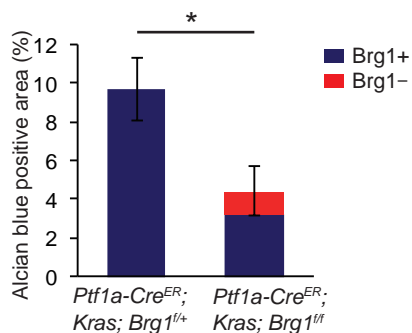

**Figure 2. Acinar-specific ablation of *Brg1* attenuates acute pancreatitis-induced PanIN formation in an oncogenic KRAS background.**

(A) Scheme showing experimental design for tamoxifen administration and caerulein-induced acute pancreatitis in *Ptf1a-Cre<sup>ER</sup>; Kras<sup>G12D</sup>; Brg1<sup>fl/fl</sup>* mice. (B) H&E and alcian blue staining and immunohistochemistry for BRG1 and phospho-ERK in *Ptf1a-Cre<sup>ER</sup>; Kras<sup>G12D</sup>; Brg1<sup>fl/fl</sup>* mice and littermate controls at 21 days after caerulein induction. Scale bars: 50 μm. (C) Immunohistochemistry for BRG1 in *Ptf1a-Cre<sup>ER</sup>; Kras<sup>G12D</sup>; Brg1<sup>fl/fl</sup>* mice at 21 days after caerulein induction. Representative BRG1-positive and BRG1-negative PanINs. Scale bars: 50 μm. (D) Quantification of alcian blue-positive area in *Ptf1a-Cre<sup>ER</sup>; Kras<sup>G12D</sup>; Brg1<sup>fl/fl</sup>* mice with littermate controls. Red bars show incidence of BRG1-negative late ADMs and PanINs. n=4 mice per genotype; means ± SEM are shown. \* P < 0.05, Student's *t* test.

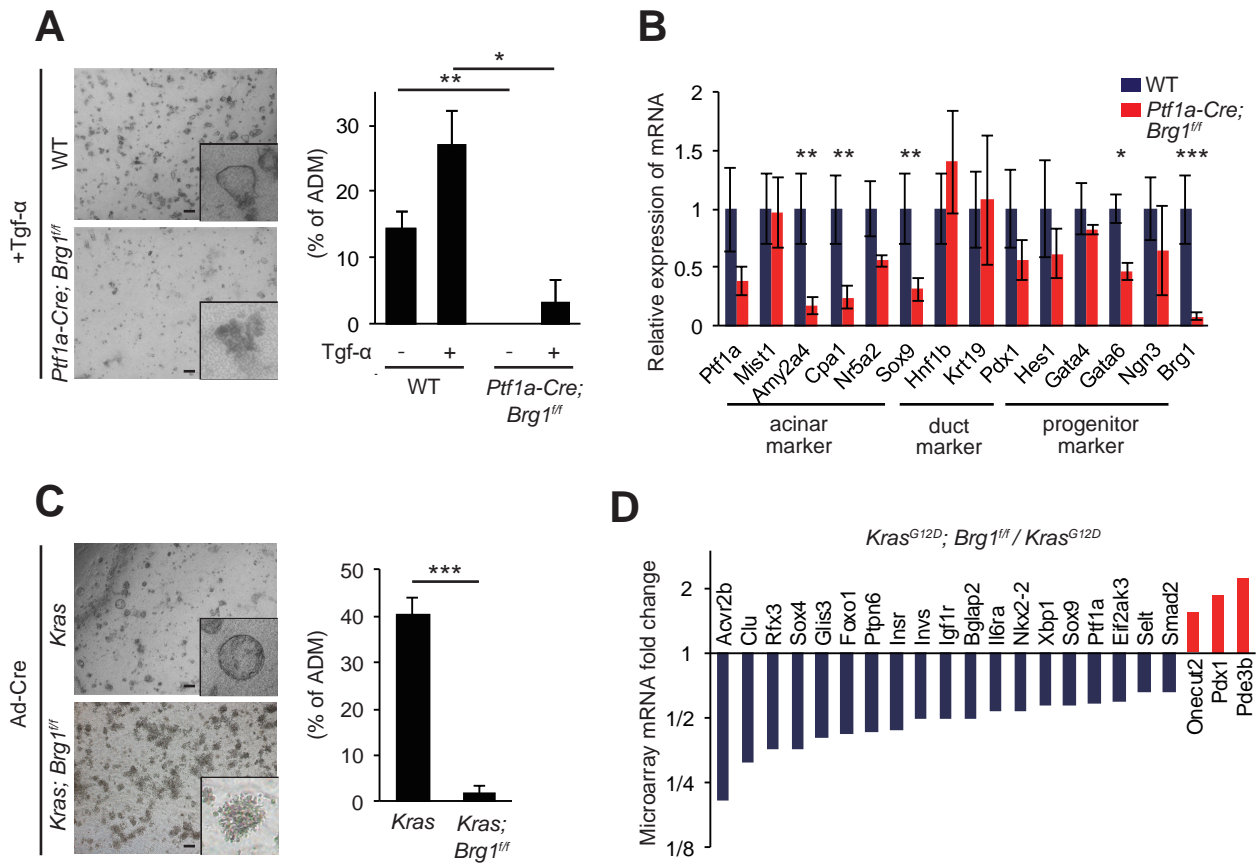

**Supplemental Figure 3. Primary acinar cell culture reveals that *Brg1* promotes *Sox9* expression.** (A) Left: Brightfield images of acinar cell clusters from WT and *Ptf1a-Cre; Brg1<sup>fl/fl</sup>* mice after 5 days of culture in collagen gel with TGF- $\alpha$ . Scale bars: 50 $\mu$ m. Right: Quantification of cystic ductal strictures in 3D-cultured acinar cell clusters from WT and *Ptf1a-Cre; Brg1<sup>fl/fl</sup>* mice after 5 days of culture in collagen gel with or without TGF- $\alpha$ . n=3 per genotype; means  $\pm$  SEM are shown. \*  $P < 0.05$ , Student's *t* test. (B) RT-PCR analysis of isolated acini from WT and *Ptf1a-Cre; Brg1<sup>fl/fl</sup>* mice. Genes important for pancreatic development and maintenance of pancreatic lineages are examined. n=3 per genotype; means  $\pm$  SEM are shown. \*  $P < 0.05$ , \*\*  $P < 0.01$ , and \*\*\*  $P < 0.001$ , Student's *t* test. (C) Left: Brightfield images of acinar cell clusters from *Kras<sup>G12D</sup>* and *Kras<sup>G12D</sup>; Brg1<sup>fl/fl</sup>* mice after 5 days of culture in collagen gel. Cells were infected with Ad-Cre on day 0. Scale bars: 50 $\mu$ m. Right: Quantification of cystic ductal strictures in 3D-cultured acinar cell clusters from Ad-Cre-infected *Kras<sup>G12D</sup>* and *Kras<sup>G12D</sup>; Brg1<sup>fl/fl</sup>* acini after 5 days of culture in collagen gel. n=3 per genotype; means  $\pm$  SEM are shown. \*\*\*  $P < 0.001$ , Student's *t* test. (D) Fold changes in the expression of genes implicated in pancreas development and maintenance of pancreatic differentiation for Ad-Cre-infected *Kras<sup>G12D</sup>; Brg1<sup>fl/fl</sup>* acini after 24h of culture relative to control Ad-Cre-infected *Kras<sup>G12D</sup>* acini after 24h of culture.

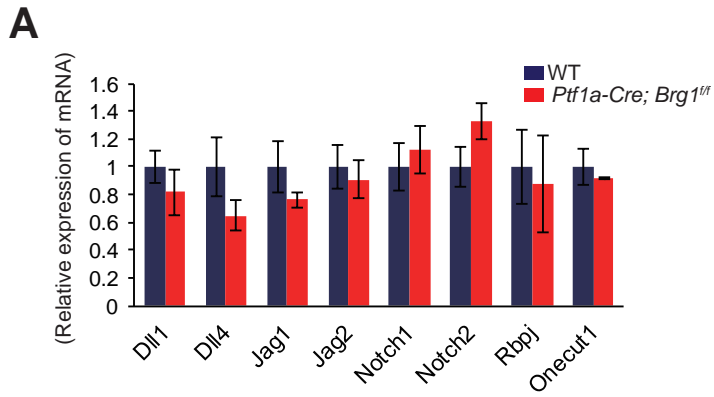

**Supplemental Figure 4. Expression of upstream regulators of *Sox9* in the pancreas is not significantly changed in *Brg1*-depleted acinar cells (A)** RT-PCR analysis of *Sox9* upstream regulators in isolated acini from WT and *Ptf1a-Cre; Brg1<sup>ff</sup>* mice. n=3 per genotype; means  $\pm$  SEM are shown. Student's *t* test.

**A***Ptf1a-Cre<sup>ER</sup>; Kras<sup>G12D</sup>; Sox9OE; Brg1<sup>fl</sup>*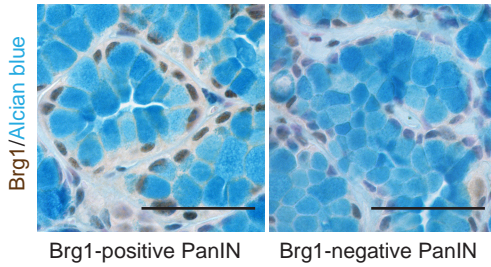**B**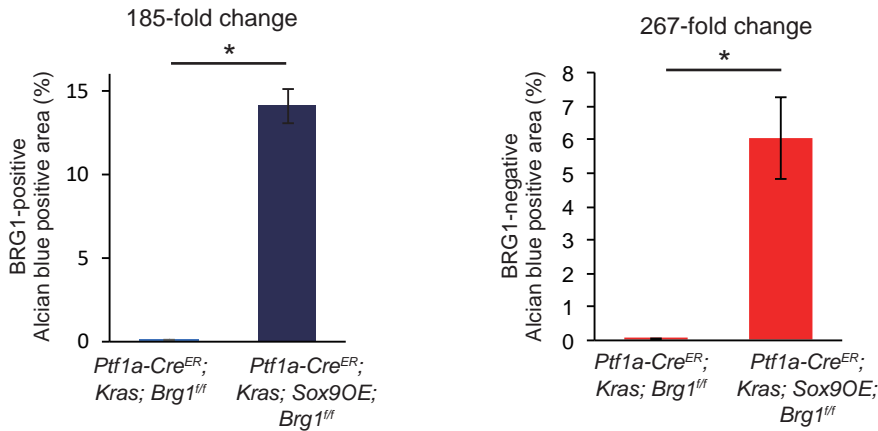

**Supplemental Figure 5. Sox9 overexpression accelerates KRAS-driven PanIN formation in mice.** (A) Immunohistochemistry for BRG1 and alcian blue staining of *Ptf1a-Cre<sup>ER</sup>; Kras<sup>G12D</sup>; Sox9OE; Brg1<sup>fl</sup>* mice. Representative BRG1-positive and BRG1-negative PanINs from the same sample are shown. Scale bars: 50 $\mu$ m. (B) Quantification of BRG1-positive and BRG1-negative PanINs in *Ptf1a-Cre<sup>ER</sup>; Kras<sup>G12D</sup>; Brg1<sup>fl</sup>* mice and *Ptf1a-Cre<sup>ER</sup>; Kras<sup>G12D</sup>; Sox9OE; Brg1<sup>fl</sup>* mice. n=3-4 mice per genotype; means  $\pm$  SEM are shown. \* P<0.05, Student's *t* test.

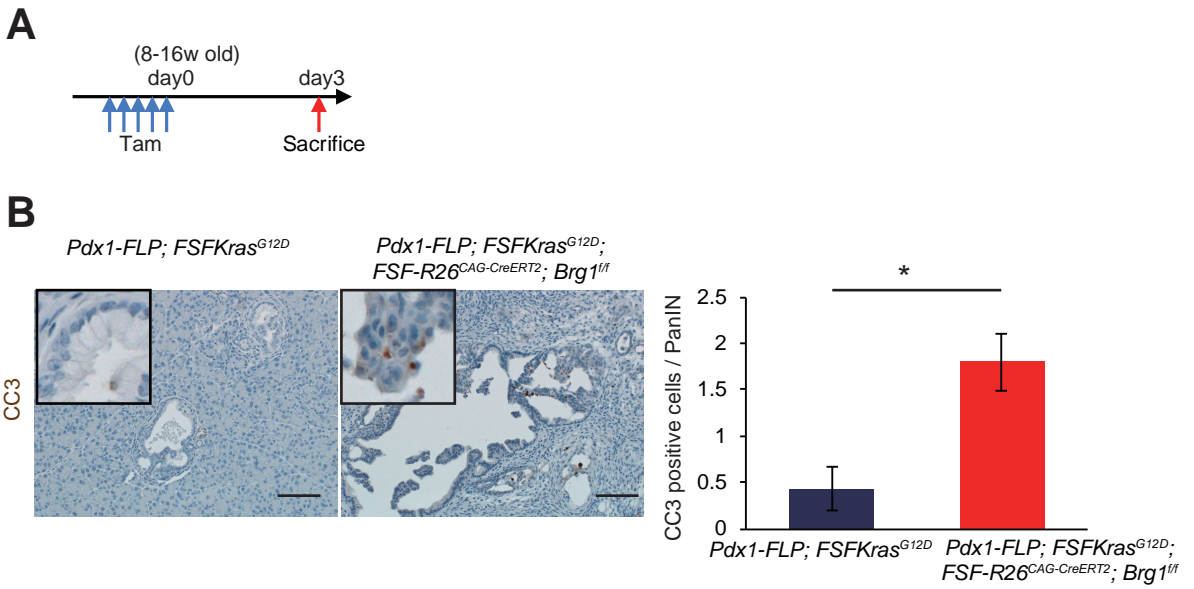

**Supplemental Figure 6. Loss of BRG1 in established PanIN results in its apoptosis.** (A) Experimental design for tamoxifen administration and analysis. (B) Immunohistochemistry for cleaved caspase 3 (CC3) in *Pdx1-Flp; FSF-Kras<sup>G12D</sup>* and *Pdx1-Flp; FSF-Kras<sup>G12D</sup>; FSF-R26<sup>CAG-CreERT2</sup>; Brg1<sup>fl/fl</sup>* mice 3 days after tamoxifen injection. Scale bars: 200 $\mu$ m. Right bar graphs are quantification for CC3 positive cells per PanIN lesion. n=3 per genotype; means  $\pm$  SEM are shown. \*P<0.05, Student's *t* test.

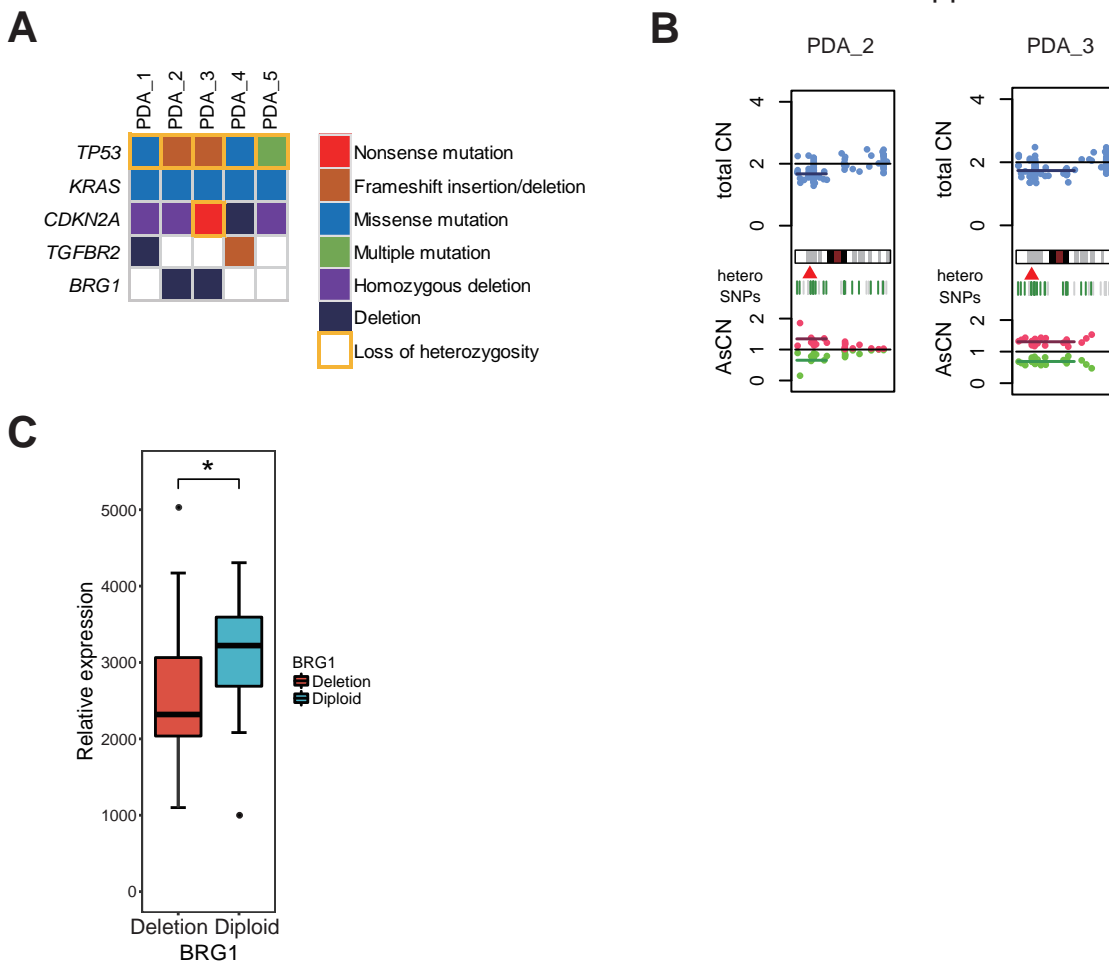

**Supplemental Figure 7 Result of targeted sequence of BRG1-low human PDA samples** (A) Mutational landscape of BRG1-low human PDA samples. *KRAS*, *TP53*, *CDKN2A* and *TGFB2* are shown as quality controls. Deletion of *BRG1* is detected in 2 of 5 BRG1-low human PDA samples. (B) Detail of loss of chromosome 19p in PDA\_2 and PDA\_3. Total copy number (total CN) and allele specific copy number (AsCN) are shown. Copy number abnormalities are shown as black bar. Red triangle shows where *BRG1* is located on. (C) Relationship between deletion of *BRG1* and *BRG1* mRNA expression from a cohort of 76 high purity samples in the TCGA data set. In the box-and-whisker plots, horizontal bars indicate the medians, boxes indicate 25th to 75th percentiles, and whiskers indicate minimum to maximum without outlier. \* $P < 0.05$ , Mann-Whitney  $U$  test.

**A**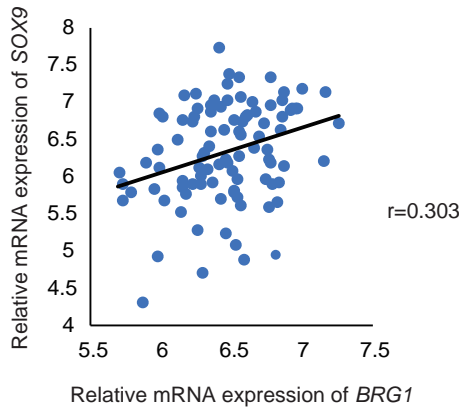**B**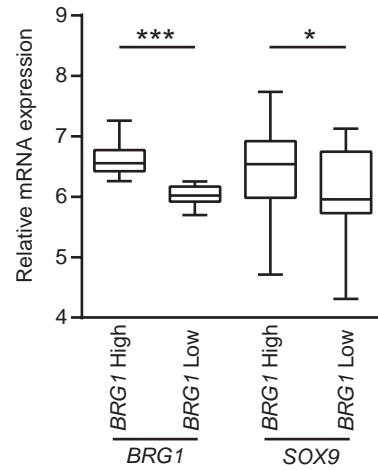

**Supplemental Figure 8 BRG1 expression correlates with SOX9 expression in human PDAs.** (A) Plots of mRNA expression of *BRG1* and *SOX9* from a cohort of 96 patients in QCMG data set. (B) The box-and-whisker plot demonstrates the differential expression for *SOX9* between the *BRG1*-high ( $n=71$ , the higher 75%) and *BRG1*-low groups ( $n=25$ , the lower 25%) from a cohort of 96 patients in the QCMG data set. In the box-and-whisker plots, horizontal bars indicate the medians, boxes indicate 25th to 75th percentiles, and whiskers indicate minimum to maximum without outlier. \*  $P < 0.05$  and \*\*\*  $P < 0.001$ , Student's *t* test.



**Supplemental Table 1: Differently expressed genes in *Kras*<sup>G12D</sup> vs. *Brg1*<sup>f/f</sup> acinar cell explants**

| <i>up</i>   |                   | <i>down</i>   |                   |
|-------------|-------------------|---------------|-------------------|
| gene symbol | fold change (log) | gene symbol   | fold change (log) |
| S100a6      | 3.7695728         | G6pc2         | -4.3786884        |
| Krtap16-1   | 3.4862444         | Fgl1          | -3.9309574        |
| Pecam1      | 3.46082           | Lgals4        | -3.1478798        |
| Plvap       | 3.3369914         | Ncor1         | -3.1447362        |
| Vaultrc5    | 2.9253636         | Csrnp1        | -3.12215          |
| D8Ertd158e  | 2.8899298         | Pdyn          | -3.1156846        |
| Sprr1a      | 2.8063721         | Espn          | -3.0293398        |
| Cfb         | 2.7875106         | Scg2          | -2.9722324        |
| Pxdn        | 2.7104712         | Cyp2s1        | -2.9414282        |
| Zdhhc1      | 2.7012344         | Slc39a10      | -2.9306106        |
| Ruvbl2      | 2.6697236         | Zfp207        | -2.9113906        |
| Col1a1      | 2.549479          | Rbm25         | -2.8066914        |
| Cxxc4       | 2.5407706         | Hif3a         | -2.775671         |
| Sprr2b      | 2.5220404         | Ins1          | -2.7639676        |
| C5ar2       | 2.5090246         | Ctsc          | -2.7582578        |
| Parp3       | 2.5035262         | Cib1          | -2.7560214        |
| Crhr1       | 2.4913382         | Nnat          | -2.7315292        |
| Tbc1d21     | 2.4566574         | Fxyd3         | -2.7256318        |
| Oasl1       | 2.4398156         | Nol3          | -2.6992188        |
| Sox15       | 2.411714          | Kif5c         | -2.669723         |
| Ecscr       | 2.3602772         | Ins2          | -2.6675257        |
| Pglyrp1     | 2.3591118         | Cyp2b10       | -2.6431714        |
| Vim         | 2.3278822         | Crem          | -2.6197104        |
| Atp1a3      | 2.317926          | Hnrnpu        | -2.5793944        |
| Rnase4      | 2.3134738         | Smarca4       | -2.5635176        |
| Fhl2        | 2.3066534         | Slco2b1       | -2.5530882        |
| Tiam1       | 2.303306          | Espn          | -2.5276976        |
| Fut4        | 2.302178          | 9530006C21Rik | -2.5276084        |
| Flna        | 2.2909526         | Spock2        | -2.5149002        |
| Col4a2      | 2.283824          | Gpr161        | -2.507926         |
| Cfb         | 2.246233          | Rlf           | -2.5061864        |
| Olf700      | 2.237329          | Ptprn         | -2.4990774        |
| Sprr2k      | 2.2317066         | Camta1        | -2.4960784        |
| Zmynd10     | 2.229248          | Spaca6        | -2.4613834        |
| Ubash3b     | 2.21154           | Oas1b         | -2.4521666        |

|               |            |               |            |
|---------------|------------|---------------|------------|
| Stk10         | 2.1982666  | Mrpl24        | -2.4520208 |
| Spin2c        | 2.1925564  | lapp          | -2.4351277 |
| Lrrc8d        | 2.1786848  | Prdm15        | -2.4310014 |
| Mtus1         | 2.16728    | Cela2a        | -2.4110698 |
| 2810001G20Rik | 2.166222   | Nupr1         | -2.4012832 |
| Bid           | 2.1643522  | Vldlr         | -2.3961516 |
| Gipc2         | 2.1548102  | Cobl          | -2.3622532 |
| Il1rn         | 2.1238714  | Snapc1        | -2.3523216 |
| Plat          | 2.1196108  | Scg3          | -2.3399758 |
| Cd59a         | 2.11433    | Acvr2b        | -2.2797718 |
| Egfl7         | 2.1121168  | Slc39a8       | -2.2697258 |
| Col4a1        | 2.1093784  | 1700084E18Rik | -2.2669544 |
| S1pr3         | 2.1036448  | Mier1         | -2.2602772 |
| Col6a2        | 2.0928492  | Mdm1          | -2.2601092 |
| Tm4sf1        | 2.0874538  | Eif2s3y       | -2.255457  |
| Nsun4         | 2.0869898  | Rbm39         | -2.2543076 |
| Wtip          | 2.0839434  | Smarca4       | -2.2536802 |
| Sparcl1       | 2.0664082  | Zswim8        | -2.246276  |
| LOC102641965  | 2.0548624  | E330011O21Rik | -2.235271  |
| S100a4        | 2.0476074  | Mfsd2b        | -2.2180882 |
| Cd93          | 2.0305624  | Cep162        | -2.2114424 |
| Tspan1        | 2.0276246  | Hmgcs2        | -2.2071542 |
| Rgs5          | 2.0171828  | Kbtbd7        | -2.184855  |
| Gngt2         | 2.004294   | Brd8          | -2.182294  |
| Pax2          | 1.9997744  | Fhad1         | -2.1773122 |
| Surf6         | 1.99900294 | Tdp1          | -2.1689114 |
| Cpt1c         | 1.9983368  | Tmem27        | -2.162126  |
| LOC102640292  | 1.99394846 | Rbm4b         | -2.1508708 |
| Kcnj14        | 1.9867608  | Klhl24        | -2.1481018 |
| Rusc2         | 1.9838986  | 1700084E18Rik | -2.1407912 |
| Plet1         | 1.96753406 | Pi4k2b        | -2.1366744 |
| Gulo          | 1.9661794  | Chga          | -2.135734  |
| Olfr476       | 1.9644666  | Ctnna1        | -2.1309466 |
| Gm2511        | 1.9583368  | B930095G15Rik | -2.1209096 |
| 2200002D01Rik | 1.9432988  | Ttc14         | -2.1143394 |
| Fxyd5         | 1.9411211  | Snrnp48       | -2.1052262 |
| Ago1          | 1.9382484  | Luc7l2        | -2.1039624 |
| Serpinf1      | 1.930038   | Myom1         | -2.1031634 |
| Max           | 1.92498732 | Lifr          | -2.099176  |

|               |            |               |             |
|---------------|------------|---------------|-------------|
| Ly6c1         | 1.92486    | Baz2b         | -2.0925398  |
| Ppp1r16a      | 1.92407846 | Tdp2          | -2.0863014  |
| Gm31447       | 1.9216404  | Fam57a        | -2.0852142  |
| Kctd12        | 1.9207878  | 2310033P09Rik | -2.08079    |
| 0610039K10Rik | 1.9205532  | Tmprss13      | -2.0797846  |
| Trpv6         | 1.9196348  | Cdk5r2        | -2.0788068  |
| Rdh10         | 1.9172892  | Dtymk         | -2.0738898  |
| Sema3f        | 1.9161796  | Smim14        | -2.0736356  |
| Gm11237       | 1.9094429  | Cep170        | -2.072608   |
| Gm30333       | 1.9055812  | Map3k9        | -2.0717116  |
| Cyp3a13       | 1.8847971  | Chgb          | -2.0716004  |
| Tdp1          | 1.8809362  | Sik2          | -2.0694806  |
| Tcf4          | 1.87875032 | Plin5         | -2.069231   |
| Sparc         | 1.87715674 | Sstr3         | -2.0581264  |
| C1rb          | 1.8747015  | Wdr44         | -2.0448328  |
| S100a13       | 1.8702006  | Gclc          | -2.0372309  |
| Psg18         | 1.86798572 | Jmy           | -2.034059   |
| A730063M14Rik | 1.8672972  | Mtmr7         | -2.0325704  |
| Spert         | 1.8583508  | Akap13        | -2.027761   |
| Adgrl4        | 1.85728074 | Ankrd10       | -2.0262828  |
| Rarres2       | 1.8554392  | Ralgapa1      | -2.0140496  |
| E330020D12Rik | 1.85492372 | Mbd1          | -2.0023246  |
| Btrc          | 1.8489218  | Ptcd3         | -1.9927969  |
| Gart          | 1.8480649  | Rel           | -1.9877644  |
| Baiap2        | 1.84704972 | B930041F14Rik | -1.9876664  |
| Cpne2         | 1.8464384  | Rnf38         | -1.9814372  |
| Ifit3         | 1.8460126  | Zfp90         | -1.978569   |
| Lamb3         | 1.8449216  | Trp53inp1     | -1.9780021  |
| Vcan          | 1.8445788  | Apaf1         | -1.97766734 |
| Ercc1         | 1.8435831  | Nrf1          | -1.97681094 |
| Gm40835       | 1.8435235  | Slc25a25      | -1.9758608  |
| lpw           | 1.8421588  | Syn2          | -1.9741664  |
| Arhgap1       | 1.8417032  | Rilpl1        | -1.9741502  |
| Ndrg2         | 1.8356166  | Zrsr1         | -1.9738462  |
| Tyrobp        | 1.83470154 | Xrn1          | -1.9697046  |
| S100a14       | 1.8204274  | Ankrd6        | -1.965605   |
| Rn7sk         | 1.81501341 | Cyp2b10       | -1.96492052 |
| Emc7          | 1.81435228 | Gm15708       | -1.96272088 |
| Cryl1         | 1.8122802  | Zfp292        | -1.95819092 |

|               |            |               |             |
|---------------|------------|---------------|-------------|
| LOC102633312  | 1.8110814  | Ccnk          | -1.9530487  |
| Rcan2         | 1.8065679  | Loxl2         | -1.9494534  |
| Clec2e        | 1.80333566 | Hdac8         | -1.94636392 |
| Zfp60         | 1.80136014 | Tanc2         | -1.9423838  |
| Gm9948        | 1.7961822  | Paxbp1        | -1.93838692 |
| Hcn3          | 1.7935302  | Fgfr1         | -1.93818832 |
| Ssh2          | 1.7903905  | Mto1          | -1.92901086 |
| Cyp4a31       | 1.7884965  | Vmp1          | -1.92567301 |
| Ehbp1l1       | 1.7874598  | Smarca4       | -1.92251874 |
| Mia           | 1.786932   | Ppp3cb        | -1.9199066  |
| Tmem40        | 1.78331972 | Blm           | -1.916286   |
| Ahi1          | 1.78113652 | Smg6          | -1.9046092  |
| Sec61a2       | 1.780479   | Fbxw8         | -1.8987928  |
| Dpysl2        | 1.7706184  | Caap1         | -1.89612126 |
| Ttll6         | 1.763125   | Asap3         | -1.890203   |
| Cspp1         | 1.7621584  | Thumpd3       | -1.87734032 |
| Gm34717       | 1.761193   | Polr3gl       | -1.87164832 |
| Adamts4       | 1.75832366 | Adora2b       | -1.8694964  |
| Kcnj9         | 1.7549748  | Adarb1        | -1.8664875  |
| Wfdc10        | 1.75328112 | Dixdc1        | -1.8661756  |
| Acss2         | 1.75222612 | Asxl1         | -1.8639112  |
| Slc35d2       | 1.7496472  | Neil1         | -1.8586836  |
| Prkcdbp       | 1.7489896  | Sntb1         | -1.85592508 |
| E230016M11Rik | 1.74750232 | Gtpbp10       | -1.8554044  |
| Egr2          | 1.7434464  | Slc17a9       | -1.8553018  |
| Krtap7-1      | 1.74334192 | Itgb4         | -1.85496    |
| Gm12853       | 1.7431006  | Hist3h2a      | -1.851675   |
| Pax6          | 1.74021388 | Luc7l2        | -1.8515978  |
| Trip13        | 1.7401619  | Pirt          | -1.8477716  |
| Amz1          | 1.7375212  | Gm31166       | -1.8465896  |
| Dpp6          | 1.7359076  | Atxn1l        | -1.8452864  |
| Fam25c        | 1.7340302  | Gm10134       | -1.8443265  |
| Lpar5         | 1.7235722  | 1700094D03Rik | -1.8403764  |
| Eml3          | 1.721488   | Adpgk         | -1.8311024  |
| Rhoj          | 1.72088    | Tubb3         | -1.82923508 |
| Gm35107       | 1.7194118  | LOC102637409  | -1.8281922  |
| Ephb4         | 1.71929694 | Tmem170       | -1.8225336  |
| Sfi1          | 1.7185502  | Gm21292       | -1.8201284  |
| Timp2         | 1.7175214  | Tnfrsf18      | -1.8169312  |

|               |            |               |             |
|---------------|------------|---------------|-------------|
| Cul9          | 1.7160268  | Slc30a7       | -1.80989    |
| Slc22a3       | 1.716016   | Socs6         | -1.80802726 |
| C030013E06Rik | 1.7159548  | Rictor        | -1.80703974 |
| Fbxw15        | 1.7144442  | Pcnp          | -1.8048968  |
| D6Ertd527e    | 1.7135604  | Cyp2b9        | -1.8031678  |
| Gng11         | 1.7096992  | Ackr2         | -1.7979806  |
| Tuba4a        | 1.70723868 | Tle4          | -1.7948041  |
| Gm4055        | 1.70326852 | Ptprn2        | -1.7881084  |
| BC025933      | 1.70243812 | Slc39a8       | -1.7838149  |
| Mmp21         | 1.6997984  | Kirrel3       | -1.78233766 |
| Chd6          | 1.6991234  | Mybph         | -1.78086854 |
| Neurl4        | 1.69731474 | Cwf19l1       | -1.7740014  |
| Ubash3b       | 1.6961336  | Ak4           | -1.77122353 |
| Best3         | 1.6950858  | Atp5g3        | -1.770658   |
| Kalrn         | 1.69247628 | Hmg20a        | -1.7683706  |
| Letmd1        | 1.68513108 | Dstyf         | -1.7669177  |
| Ufsp1         | 1.684566   | Tor3a         | -1.76583886 |
| Gm10378       | 1.6828122  | Pcsk2         | -1.763401   |
| Nlrp3         | 1.68192148 | Vldlr         | -1.7610364  |
| Fstl1         | 1.677742   | Ccdc58        | -1.75910092 |
| Trnau1ap      | 1.67653632 | Stk38         | -1.7530918  |
| Nlrp9c        | 1.6753936  | Lrp11         | -1.750665   |
| Nrp2          | 1.6750996  | Cd164l2       | -1.7497616  |
| Ren1          | 1.67440986 | Accs          | -1.74866272 |
| 2610020H08Rik | 1.67135906 | Tox           | -1.7480216  |
| Aars          | 1.668941   | Cspp1         | -1.7474332  |
| Lce6a         | 1.66782188 | Golgb1        | -1.7430448  |
| Impa2         | 1.66735792 | Strn          | -1.7410912  |
| Pbld2         | 1.66490268 | Gm16907       | -1.7406974  |
| Cxcl5         | 1.6630964  | Pnp           | -1.7391672  |
| Rnu3b1        | 1.6624236  | Serinc4       | -1.7373164  |
| Lmbr1         | 1.65731454 | Abcg1         | -1.73602772 |
| Cdh6          | 1.6549098  | R3hdm1        | -1.735244   |
| Rab27b        | 1.65487766 | Nrf1          | -1.7346556  |
| 1700061N14Rik | 1.65315866 | Zc3h8         | -1.732986   |
| Dhrs4         | 1.6476274  | 6430548M08Rik | -1.73165894 |
| Tmem143       | 1.647129   | Arid5b        | -1.7287588  |
| Cplx1         | 1.64645052 | Srsf11        | -1.72586108 |
| Helz          | 1.64599228 | Fam188a       | -1.7233305  |

|               |            |               |             |
|---------------|------------|---------------|-------------|
| Gimap3        | 1.64459228 | Arid4b        | -1.72082854 |
| Zscan10       | 1.64259    | Itpkc         | -1.71879912 |
| A730043L09Rik | 1.6420326  | Myo9a         | -1.7159998  |
| 4930458B22Rik | 1.642025   | Fv1           | -1.714242   |
| Tgfb1i1       | 1.641861   | Wrn           | -1.713656   |
| Dclk1         | 1.6383844  | Jazf1         | -1.7133984  |
| Gm10413       | 1.6380866  | Abca2         | -1.7132964  |
| Ptx3          | 1.63552    | Sik2          | -1.7126255  |
| Sparc         | 1.6333437  | Dbf4          | -1.7090676  |
| Olf960        | 1.63275766 | Mdp1          | -1.708097   |
| Ephx2         | 1.6300621  | Ccnl1         | -1.707634   |
| 4933432I09Rik | 1.6297688  | Tapt1         | -1.7070136  |
| Idi1          | 1.62880566 | Rab14         | -1.70523428 |
| Nrxn3         | 1.62705994 | Lcor          | -1.7039122  |
| Mlph          | 1.62181472 | Cpeb1         | -1.70170832 |
| Limch1        | 1.618432   | Smoc1         | -1.70144748 |
| Cxcl12        | 1.61839628 | Psmc7         | -1.6999126  |
| Ccl2          | 1.61657668 | Metrl         | -1.6985991  |
| Esm1          | 1.6148458  | Saxo2         | -1.6976194  |
| Slc25a43      | 1.61351966 | Eda2r         | -1.6975632  |
| Rcn3          | 1.612715   | Cobll1        | -1.69546032 |
| Dut           | 1.6112704  | ApoE          | -1.6945858  |
| Alg14         | 1.6080222  | Bsdc1         | -1.6911686  |
| Itgb6         | 1.60698652 | Stil          | -1.68970966 |
| Vmn1r201      | 1.60607052 | 1110019D14Rik | -1.68858146 |
| Gm31359       | 1.6058874  | Foxred2       | -1.687685   |
| Scgb2b27      | 1.6058712  | Ogt           | -1.6829724  |
| 2610316D01Rik | 1.6048894  | Kansl1        | -1.6809964  |
| Vmn1r70       | 1.60373354 | 1700012D01Rik | -1.67886972 |
| Eng           | 1.60000468 | Cdk17         | -1.6781454  |
| Flna          | 1.5990405  | Lsmem1        | -1.6780934  |
| Hemt1         | 1.5960112  | Mterf1a       | -1.67666674 |
| Gm33255       | 1.5954876  | Pigv          | -1.67464208 |
| Arap3         | 1.5944376  | Mrpl3         | -1.67338372 |
| Tesk2         | 1.5935626  | Clu           | -1.6732464  |
| Sox7          | 1.59324194 | Hap1          | -1.6715732  |
| Gngt2         | 1.59136772 | Nfyb          | -1.66943312 |
| Nicn1         | 1.5883908  | Map1b         | -1.668592   |
| LOC102642348  | 1.586997   | Snhg11        | -1.6662154  |

|               |            |               |             |
|---------------|------------|---------------|-------------|
| Fam83e        | 1.58220386 | Heca          | -1.6652188  |
| 5830403F22Rik | 1.58150386 | Nipbl         | -1.6627328  |
| Mvk           | 1.5786478  | Ccdc34        | -1.66235734 |
| Gimap6        | 1.5769286  | Adra2a        | -1.6592622  |
| Olfm1         | 1.5768692  | B4galt6       | -1.6589246  |
| Cdhr2         | 1.57247686 | Micu2         | -1.65721512 |
| Snx29         | 1.566329   | Lifr          | -1.6571278  |
| Olfm635       | 1.5661078  | Eva1c         | -1.65687132 |
| Gm13544       | 1.56551408 | Zfp933        | -1.6554646  |
| Anxa3         | 1.5652762  | Anxa11        | -1.65519952 |
| Tmem176b      | 1.56466532 | 1700048O14Rik | -1.6545584  |
| Pdzk1ip1      | 1.56312752 | Vwa5a         | -1.6502843  |
| Bcr           | 1.5625582  | Rab23         | -1.64795756 |
| Tenm4         | 1.555906   | Heca          | -1.64769172 |
| Fbxo46        | 1.5558936  | 2610015P09Rik | -1.6442754  |
| Nlrp5         | 1.55384374 | Ankhd1        | -1.6438716  |
| 2700081O15Rik | 1.5522098  | Sfxn2         | -1.64363288 |
| Gtf2ird1      | 1.5487056  | Ppil6         | -1.6388185  |
| Grk1          | 1.5481453  | Vamp4         | -1.636539   |
| Kcnn1         | 1.5449276  | Glcci1        | -1.6352162  |
| Chd7          | 1.5427768  | Bnip3         | -1.6339135  |
| Gm5592        | 1.542182   | Gm36841       | -1.6336322  |
| Fcrls         | 1.5410542  | A030001D20Rik | -1.63274812 |
| Vcam1         | 1.54100514 | Hist1h1c      | -1.63140534 |
| Gm12298       | 1.5397448  | Sik2          | -1.6283803  |
| Slfn5         | 1.53928972 | Akap13        | -1.62659932 |
| Mamstr        | 1.5371552  | Tnfrsf26      | -1.6249442  |
| Fbln1         | 1.53593588 | Phf12         | -1.6244674  |
| S100a10       | 1.53489828 | Rgmb          | -1.62060452 |
| Zap70         | 1.53335952 | 2610002M06Rik | -1.619071   |
| Gm9866        | 1.533009   | Gcg           | -1.6168294  |
| Gfi1          | 1.53125548 | Has1          | -1.61623288 |
| Ppnr          | 1.5301926  | Rrbp1         | -1.61595512 |
| Slc25a37      | 1.5296492  | Atf7ip        | -1.61536788 |
| Pter          | 1.5263634  | Acvr1b        | -1.61323834 |
| AI646519      | 1.52596712 | Tshz2         | -1.613066   |
| Shisa6        | 1.5240326  | Nanos1        | -1.61275672 |
|               | 5-Sep      | Cep85         | -1.61186552 |
| Tcl1b5        | 1.52043628 | Cd28          | -1.6111166  |

|               |            |               |             |
|---------------|------------|---------------|-------------|
| Cp            | 1.5201626  | Prelid2       | -1.6106534  |
| Pcyt2         | 1.51987886 | Pus3          | -1.6103072  |
| Gm10845       | 1.51615334 | A330058E17Rik | -1.606749   |
| Uhrf1         | 1.513813   | Sbk1          | -1.60173512 |
| Dusp4         | 1.5105538  | Jmjd1c        | -1.6015191  |
| 9330188P03Rik | 1.5104976  | Tmtc3         | -1.6012082  |
| Plekhm1       | 1.50812054 | Gabarapl1     | -1.6008906  |
| Cdh5          | 1.5080724  | Synj1         | -1.6008534  |
| Gm4013        | 1.50692272 | Edem3         | -1.5995655  |
| Plet1         | 1.50637006 | Ibtk          | -1.5990438  |
| Tsga10        | 1.50547552 | P4ha1         | -1.5990248  |
| Olfr901       | 1.5044842  | Rrm2          | -1.5974546  |
| Mxra7         | 1.50241614 | 3110056K07Rik | -1.5966301  |
| Lrrc16b       | 1.5016198  | Btbd3         | -1.5965788  |
| Fdps          | 1.49921752 | Atxn7l3       | -1.5955782  |
| 9030607L02Rik | 1.4978848  | Mllt11        | -1.591124   |
| LOC102642943  | 1.4968729  | Ptk2b         | -1.58984708 |
| Igfbp7        | 1.4963016  | Kctd1         | -1.58969    |
| Armcx6        | 1.4956     | Ppm1a         | -1.58922052 |
| Sass6         | 1.4955354  | Tmem68        | -1.5868178  |
| Pmp22         | 1.4942744  | Zbtb34        | -1.58534    |
| Pisd-ps3      | 1.4924054  | Stx3          | -1.58398152 |
| 1700019O17Rik | 1.4895091  | Susd1         | -1.58339072 |
| Kcnk6         | 1.4875646  | LOC105243338  | -1.58317708 |
| Pafah2        | 1.48661232 | Gm30816       | -1.58251954 |
| A230045G11Rik | 1.4859271  | Bbs4          | -1.5785642  |
| Bgn           | 1.4808564  | Fam118b       | -1.5775032  |
| Nat8          | 1.47876788 | Muc6          | -1.57690668 |
| Tmem176a      | 1.47679    | Prpf39        | -1.57610512 |
| Btbd2         | 1.4764466  | Nln           | -1.5757956  |
| S100a10       | 1.4763608  | Sf1           | -1.5743785  |
| Rcan2         | 1.47618294 | Pim1          | -1.5735507  |
| Ube2dnl2      | 1.47437788 | 4930513N10Rik | -1.5718258  |
| 4933439C10Rik | 1.4729548  | Ptgds         | -1.5716152  |
| Ctgf          | 1.4691172  | Asap2         | -1.57126    |
| 1700037H04Rik | 1.4662738  | Stk36         | -1.57018852 |
| Mmp8          | 1.4662046  | Malt1         | -1.5698132  |
| Defa23        | 1.4592576  | Sly           | -1.5688529  |
| Cacna1d       | 1.4592032  | Elp2          | -1.56795168 |



|               |            |           |             |
|---------------|------------|-----------|-------------|
| Prss23os      | 1.45319748 | Usp32     | -1.5666258  |
| 1810049I09Rik | 1.4510789  | Akap13    | -1.5658422  |
| Rcan2         | 1.4510372  | Pfkp      | -1.56499148 |
| Cyp51         | 1.4496732  | Kdm6a     | -1.5618372  |
| Pde4b         | 1.44868612 | Cnot6l    | -1.56176568 |
| Bak1          | 1.44762706 | Tef       | -1.5540905  |
| Ets1          | 1.4469614  | Utp14a    | -1.5497303  |
| Cd276         | 1.4467258  | Ncoa2     | -1.5490642  |
| Ucp2          | 1.4459176  | Zfp638    | -1.54567194 |
| Slc12a7       | 1.4452696  | Gm5901    | -1.5445952  |
| Tuba1a        | 1.4443545  | Mier1     | -1.5422892  |
| Myo16         | 1.4434018  | Cep78     | -1.54117012 |
| Fuom          | 1.4431472  | Cep192    | -1.5322266  |
| Wdr18         | 1.4392138  | Zfc3h1    | -1.5319438  |
| Olf157-ps1    | 1.43879652 | BB166591  | -1.53128434 |
| Myo18a        | 1.43531228 | Rad23b    | -1.5306735  |
| Gm15343       | 1.43509412 | Cabin1    | -1.5302444  |
| Enho          | 1.43436    | Ptbp2     | -1.52979708 |
| Fads3         | 1.4343266  | Lcor      | -1.5278511  |
| Wdr7          | 1.43332    | Arhgap5   | -1.5278392  |
| 1700123K08Rik | 1.4328842  | Insig2    | -1.5247478  |
| Cyp17a1       | 1.4317984  | Ppp1r10   | -1.5222354  |
| Kng1          | 1.4314528  | Slc39a14  | -1.521812   |
| Acta1         | 1.4308324  | Zfp871    | -1.5215774  |
| 4930570B17Rik | 1.4302154  | Fbxo30    | -1.520946   |
| Rasl12        | 1.4298444  | Hist2h2be | -1.5190778  |
| Gm13889       | 1.429657   | Ak4       | -1.51810646 |
| Nipal3        | 1.4296494  | Camk2b    | -1.51430274 |
| Copg2         | 1.42954826 | Ngly1     | -1.5133142  |
| Ccdc42        | 1.4273236  | Fam114a2  | -1.51223612 |
| Camk1d        | 1.426369   | Arfgap2   | -1.5119224  |
| Gm30893       | 1.42490148 | Rpap2     | -1.51075792 |
| Tuba1a        | 1.42126893 | Rab3a     | -1.51056146 |
| Slc14a2       | 1.4202578  | Ccnl1     | -1.50827026 |
| Disc1         | 1.4198482  | Ap3m2     | -1.5070064  |
| Gm9918        | 1.4192472  | Gm7285    | -1.50685572 |
| Lpcat4        | 1.41889    | Celsr2    | -1.5058684  |
| Gucy2f        | 1.41705846 | Rab30     | -1.5056396  |
| Rdh9          | 1.41662932 | Ptk2b     | -1.5042458  |

|               |            |               |             |
|---------------|------------|---------------|-------------|
| Igf2bp2       | 1.416379   | Mlh3          | -1.50392866 |
| Sh2d2a        | 1.416008   | D5Ertd579e    | -1.50279    |
| Tmod2         | 1.41473294 | Ttc22         | -1.50100208 |
| Fads2         | 1.4140048  | Ankrd28       | -1.4989953  |
| Xlr4a         | 1.413178   | Neat1         | -1.49691868 |
| Gcnt2         | 1.41272974 | Fgb           | -1.4967096  |
| Ucp2          | 1.41186572 | Nudt14        | -1.4965994  |
| Slc35e1       | 1.40927886 | Tmem74b       | -1.4962802  |
| Gm39749       | 1.4085207  | B3galnt2      | -1.4956736  |
| Lpar6         | 1.408081   | Btbd9         | -1.4947572  |
| Gm33950       | 1.4063077  | Acox3         | -1.49449086 |
| Setd3         | 1.40557528 | Casp9         | -1.4936876  |
| Cyp51         | 1.40480566 | Adcy6         | -1.4930446  |
| Fer1l4        | 1.40245748 | Rfx3          | -1.4905796  |
| Mapk11        | 1.4014382  | Wsb1          | -1.489018   |
| BC061237      | 1.4007888  | Firre         | -1.487143   |
| Gm11757       | 1.4003162  | Aen           | -1.48464632 |
| Endod1        | 1.400281   | Ctsh          | -1.4828248  |
| 4930405J17Rik | 1.3992882  | Polr3gl       | -1.4822784  |
| Catsperd      | 1.3980966  | Bcl11a        | -1.480777   |
| Ckb           | 1.3964028  | Itpkc         | -1.4798656  |
| Igsf9         | 1.395786   | Foxo4         | -1.47849512 |
| Gm8127        | 1.3956954  | Gtpbp8        | -1.4767532  |
| Sox17         | 1.3944878  | Miat          | -1.4759724  |
| Layn          | 1.390346   | 2900005J15Rik | -1.4748674  |
| Gm33318       | 1.3896654  | Sox4          | -1.47395134 |
| L3mbtl2       | 1.38892508 | C230096K16Rik | -1.4728932  |
| Ahnak         | 1.38795232 | Slc39a8       | -1.4727559  |
| Ltbp2         | 1.3875244  | Pfkp          | -1.4722686  |
| Gm10406       | 1.38594914 | Morc3         | -1.47051668 |
| Emp3          | 1.38574028 | Zbtb43        | -1.4693427  |
| 5930435M05Rik | 1.3854322  | Cbx2          | -1.46702432 |
| 1700091H14Rik | 1.38451    | Pisd-ps3      | -1.46667672 |
| Pdlim4        | 1.3836856  | Vezf1         | -1.4656544  |
| Ggn           | 1.3826742  | Eif4g3        | -1.4653616  |
| Trappc1       | 1.3820715  | Ccnl1         | -1.46345186 |
| Nrep          | 1.3805232  | Prkab2        | -1.4633198  |
| Crxos         | 1.38036252 | H2-Ab1        | -1.4624486  |
| Lgals3        | 1.3795762  | Rnf219        | -1.4609652  |

|               |            |          |             |
|---------------|------------|----------|-------------|
| Eno4          | 1.3794534  | Mlh1     | -1.45999432 |
| Dnlz          | 1.3781114  | Ube2g2   | -1.45954752 |
| Sp7           | 1.37694788 | Mllt10   | -1.4594884  |
| Wdr25         | 1.3758306  | Luc7l2   | -1.4577308  |
| Cenpb         | 1.3753602  | Atxn7l1  | -1.4573164  |
| Ddc           | 1.3745646  | Zmym5    | -1.45721388 |
| Gm36269       | 1.3734646  | Lrig2    | -1.456408   |
| Cep68         | 1.37282752 | Arf3     | -1.4556322  |
| Spock1        | 1.3710732  | Odf2l    | -1.4538994  |
| Olfr1513      | 1.3710222  | Arfgef1  | -1.4536042  |
| Hivep3        | 1.37034894 | Btbd10   | -1.4525442  |
| Eif4ebp2      | 1.3688912  | Dip2b    | -1.45225286 |
| Fam189b       | 1.3679662  | Srp54a   | -1.45192432 |
| Tpst1         | 1.3669114  | Lrp11    | -1.4509396  |
| Ifna9         | 1.3631778  | Syng1    | -1.44786692 |
| 2310007L24Rik | 1.3631144  | Cdkn1a   | -1.4471888  |
| Ifitm5        | 1.3622196  | Vmp1     | -1.4470858  |
| Trpv4         | 1.3621216  | Anapc16  | -1.445262   |
| Itgax         | 1.36030412 | Srgap1   | -1.44457674 |
| Amer1         | 1.3602514  | Cry2     | -1.443512   |
| Asb13         | 1.3598518  | Zbtb44   | -1.44331646 |
| Klhl30        | 1.3596668  | Ric8b    | -1.4431458  |
| Tgif2         | 1.357975   | Lpin2    | -1.4430146  |
| Zfp953        | 1.356118   | Flrt1    | -1.4426122  |
| Gpd1l         | 1.3557716  | Zbtb41   | -1.44101428 |
| Apoc2         | 1.3555231  | Uck2     | -1.4403792  |
| Tfeb          | 1.3550486  | Chrm3    | -1.4387336  |
| Jade2         | 1.3549638  | Mipep    | -1.438127   |
| Lppos         | 1.3530738  | Cdc42bpa | -1.43795728 |
| Vps52         | 1.3519116  | Arl5b    | -1.4378448  |
| Rin3          | 1.3509894  | H2-Ab1   | -1.43747472 |
| Aqp3          | 1.35041666 | Strn4    | -1.43741226 |
| Cmb1          | 1.35033106 | Gm9910   | -1.43594646 |
| Cmtm7         | 1.3483744  | Arntl2   | -1.435718   |
| Rln3          | 1.34790706 | Parp16   | -1.4346132  |
| Fkbp6         | 1.34779454 | Ttr      | -1.4331718  |
| 2410017I17Rik | 1.3469844  | Akap10   | -1.4326592  |
| Hpgd          | 1.3440792  | Vangl1   | -1.431443   |
| Creb3         | 1.3424096  | Tmem161b | -1.430316   |

|               |            |               |             |
|---------------|------------|---------------|-------------|
| Gm14496       | 1.34200572 | Capza2        | -1.42862654 |
| Ucp3          | 1.34146834 | Nup133        | -1.42657566 |
| Jak3          | 1.3406825  | Lsm14b        | -1.424887   |
| Tubb2a        | 1.33916521 | Strip1        | -1.42487574 |
| Plagl2        | 1.3387251  | Cdkn1a        | -1.4236002  |
| Ablim1        | 1.338377   | B3gnt1        | -1.42325448 |
| Mboat7        | 1.33761072 | Tmem5         | -1.42254352 |
| 2310007L24Rik | 1.33633708 | Luc7l2        | -1.4224076  |
| Cilp2         | 1.3352556  | Ndel1         | -1.42214394 |
| Srprb         | 1.3344092  | Dock9         | -1.42210626 |
| Gba2          | 1.33308268 | 2810403A07Rik | -1.4193378  |
| Zcchc6        | 1.3321076  | Gpc4          | -1.4188156  |
| LOC102641619  | 1.3319712  | Bach1         | -1.41861772 |
| Olf100        | 1.3317709  | Eps8          | -1.4180036  |
| Csf1          | 1.3310418  | Smad3         | -1.4176226  |
| Emcn          | 1.3307867  | Dusp16        | -1.41723728 |
| Gm7596        | 1.3307152  | Sfpq          | -1.4169044  |
| Osbp2         | 1.3291111  | Erich1        | -1.416749   |
| Grm4          | 1.32907534 | Wdr31         | -1.4158168  |
| Gm29371       | 1.3289442  | Iqgap2        | -1.4153466  |
| Pop7          | 1.32721568 | G2e3          | -1.41396332 |
| Sla2          | 1.32406    | Zfr           | -1.412847   |
| 1500009C09Rik | 1.32366466 | Ints8         | -1.41263772 |
| Sort1         | 1.3228817  | Sfpq          | -1.41177988 |
| 1810073O08Rik | 1.3214812  | Stk4          | -1.407527   |
| Dcx           | 1.3212356  | Kif1b         | -1.4062514  |
| Cndp2         | 1.3190556  | Paxbp1        | -1.4061914  |
| Il34          | 1.3188157  | Jmjd1c        | -1.4059854  |
| A530072M11Rik | 1.3171916  | Elk4          | -1.4054832  |
| Hspb6         | 1.3170495  | Gdap10        | -1.40469646 |
| Cdh13         | 1.3169556  | Klhl21        | -1.40404368 |
| Ifi27l2b      | 1.315825   | Nsun4         | -1.40394354 |
| Man1b1        | 1.3157568  | Leng8         | -1.40389634 |
| Il17rd        | 1.314879   | Ttc14         | -1.4018478  |
| Rbks          | 1.3147092  | Sprtn         | -1.4010076  |
| 4930517J16Rik | 1.31447052 | Scnn1b        | -1.4003818  |
| Scmh1         | 1.3130908  | Egln1         | -1.3997426  |
| Serpine1      | 1.31286288 | Slc39a3       | -1.3995955  |
| Gbf1          | 1.31248092 | Hmx3          | -1.3995762  |

|               |            |               |             |
|---------------|------------|---------------|-------------|
| 1700052K11Rik | 1.31244468 | Pak3          | -1.39799095 |
| Cylc2         | 1.3124352  | Serpina3n     | -1.3971524  |
| LOC102635521  | 1.3112264  | Ube2d1        | -1.3968062  |
| Smarcc1       | 1.31078148 | Fam49a        | -1.3955674  |
| Il27          | 1.309854   | Unkl          | -1.39552688 |
| Atp1a1        | 1.30958032 | 1190002N15Rik | -1.39499    |
| Slc37a3       | 1.3092084  | Vps33b        | -1.3948174  |
| Adamts7       | 1.308599   | Ppp1r3f       | -1.3942442  |
| Arsi          | 1.3085752  | Rtn1          | -1.39418412 |
| Chst1         | 1.3067727  | Gfm2          | -1.3935168  |
| Atp6v1e2      | 1.3048656  | A430061O12Rik | -1.3927674  |
| Efnb2         | 1.301887   | LOC102631757  | -1.390789   |
| Rtn4rl2       | 1.3015342  | Atp6v0a2      | -1.3902235  |
| N6amt2        | 1.3006888  | Snx10         | -1.3890009  |
| Gm3238        | 1.29913688 | Rnf217        | -1.38896226 |
| Arhgap27os1   | 1.2981258  | Eps15         | -1.3888984  |
| Pklr          | 1.29804086 | Cdv3          | -1.3882832  |
| Mgst1         | 1.2978234  | Safb2         | -1.3874488  |
| Vmn1r178      | 1.2974234  | Tacc2         | -1.387342   |
| LOC102636792  | 1.29734706 | C330020E22Rik | -1.3864746  |
| Ppp1r14d      | 1.2953329  | Rab9          | -1.3858728  |
| 5430405H02Rik | 1.2948742  | Rffl          | -1.3854446  |
| Nell2         | 1.29294252 | Hnrnpl        | -1.3827162  |
| LOC547349     | 1.2919416  | Cdyl          | -1.381504   |
| Gm28209       | 1.2918902  | Mdn1          | -1.38142728 |
| Tchp          | 1.2916184  | Tmem56        | -1.38096952 |
| Lix1l         | 1.2905104  | Tmem254a      | -1.3804316  |
| Gpihbp1       | 1.2901506  | Nr1d2         | -1.3799901  |
| Serpib3c      | 1.28970766 | Phf7          | -1.379307   |
| Zfp142        | 1.2890406  | Dhrs13os      | -1.37874532 |
| Cideb         | 1.28819228 | Mtmr9         | -1.3773198  |
| Olfr1316      | 1.2878508  | Otud3         | -1.3772206  |
| Zfp526        | 1.2872591  | Dgkq          | -1.3770938  |
| Platr9        | 1.28717732 | Ccdc61        | -1.37677432 |
| 9030624J02Rik | 1.286686   | Ctsl          | -1.3763938  |
| Bicc1         | 1.2862389  | Mdm2          | -1.3762746  |
| 5230400M03Rik | 1.285361   | Sclt1         | -1.3755372  |
| 3-Sep         | 1.28486252 | Tmem14a       | -1.37461234 |
| Nagpa         | 1.28383208 | Zbed6         | -1.3730483  |

|               |            |               |             |
|---------------|------------|---------------|-------------|
| Sec63         | 1.28289748 | 1700047A11Rik | -1.3729448  |
| Rabl3         | 1.2826214  | Tcf7l2        | -1.3729086  |
| Cmtm2b        | 1.2815485  | Map2          | -1.37280608 |
| Gm13247       | 1.28109408 | Nf1           | -1.37161732 |
| Mc5r          | 1.28106832 | 0610010F05Rik | -1.3714218  |
| Knstrn        | 1.2807202  | Btg2          | -1.3709454  |
| Zfp367        | 1.280499   | Fem1c         | -1.3703656  |
| Lrwd1         | 1.2795158  | Med13         | -1.3698526  |
| Plekhh3       | 1.27893805 | Ralgapa1      | -1.3691688  |
| Lrrc51        | 1.2780948  | Fam185a       | -1.3671875  |
| Cpn1          | 1.2774792  | Fopnl         | -1.3669734  |
| Pitpna        | 1.27688286 | Ccdc134       | -1.3667164  |
| Tmem41a       | 1.2767882  | Ccdc97        | -1.3661804  |
| Xrcc6         | 1.2765408  | Hs2st1        | -1.36509752 |
| Cd34          | 1.276515   | Ctu2          | -1.3633718  |
| Lysmd2        | 1.2752376  | Slc26a9       | -1.3621888  |
| Eprs          | 1.27506828 | Zbtb4         | -1.36216832 |
| Ghrl          | 1.275043   | Sec24b        | -1.3621154  |
| Ednrb         | 1.274847   | Tgif1         | -1.362041   |
| Hemk1         | 1.27402448 | Wnt4          | -1.3608532  |
| Mettl7a3      | 1.27396392 | D230025D16Rik | -1.3608436  |
| H2-Q5         | 1.27370072 | Gpr137        | -1.36010646 |
| Baiap2l2      | 1.2732082  | Anapc4        | -1.35835552 |
| Tmem181a      | 1.2720995  | Flot1         | -1.35631728 |
| Toe1          | 1.271323   | Acsl5         | -1.3552318  |
| Dcdc2b        | 1.2712484  | Mbd6          | -1.3540196  |
| Ankrd52       | 1.2703404  | Gm19818       | -1.3536725  |
| Top2a         | 1.2693934  | Gm8300        | -1.35295463 |
| Gm35650       | 1.2691736  | Ide           | -1.351985   |
| Dcp2          | 1.268527   | Gm42102       | -1.35076045 |
| Wdr62         | 1.268466   | Rcn2          | -1.35052014 |
| A730062M13Rik | 1.268393   | Tmtc2         | -1.3503108  |
| Jsrp1         | 1.26838112 | Ip6k1         | -1.3499274  |
| Apobec1       | 1.26832532 | Polg          | -1.3498311  |
| Nasp          | 1.2674716  | Nup133        | -1.3496938  |
| 4931440J10Rik | 1.26695228 | 2010320M18Rik | -1.34899    |
| Brd9          | 1.26687288 | Arhgap12      | -1.348681   |
| Gda           | 1.2668076  | Ccnj          | -1.34767866 |
| 4930406D18Rik | 1.26645088 | Usp31         | -1.3472681  |

|               |            |               |             |
|---------------|------------|---------------|-------------|
| Itgb6         | 1.265665   | Tssc1         | -1.3466218  |
| Vmn2r-ps54    | 1.2654059  | Lcor          | -1.3462396  |
| Fancd2os      | 1.26523137 | Sdccag8       | -1.34568452 |
| Pld1          | 1.2651672  | B3gnt3        | -1.345439   |
| Glycam1       | 1.26274872 | Rprm          | -1.34399652 |
| Trp53i11      | 1.2621942  | Mllt6         | -1.34349394 |
| Zfp608        | 1.26201486 | Rcor2         | -1.3433728  |
| Npw           | 1.26155568 | Dcdc2a        | -1.3426352  |
| Abr           | 1.26111508 | Gm14167       | -1.3421607  |
| 2410141K09Rik | 1.2600684  | Trim3         | -1.341721   |
| Tatdn3        | 1.259203   | Ctsf          | -1.3416476  |
| Etv3l         | 1.2580545  | Sufu          | -1.3412252  |
| Kif24         | 1.257577   | Smug1         | -1.3409872  |
| Hap1          | 1.25641108 | Alkbh8        | -1.3383682  |
| Tcte1         | 1.2564092  | Flot1         | -1.3373828  |
| Abhd8         | 1.2559924  | Crem          | -1.3367734  |
| Ppp6c         | 1.2550464  | Pih1d3        | -1.33659648 |
| Gabbr3        | 1.2550032  | Atf3          | -1.33495474 |
| Fam109b       | 1.25243806 | Mtmr6         | -1.3339376  |
| Fam189b       | 1.2523172  | Gm20747       | -1.3337059  |
| Gal3st2       | 1.2518318  | Pdk3          | -1.3329764  |
| C79015        | 1.2477364  | Sun1          | -1.3323226  |
| Tfip11        | 1.2471108  | Rbm33         | -1.3312745  |
| Kcnn2         | 1.2458548  | Gpr146        | -1.3311186  |
| Hexb          | 1.2457416  | 4931406H21Rik | -1.32934094 |
| Snx24         | 1.24496412 | Stam          | -1.3292408  |
| Mis18bp1      | 1.2445631  | Cux1          | -1.3286672  |
| 1700097N02Rik | 1.2445407  | Ccdc15        | -1.3280392  |
| Cspg4         | 1.24395514 | Dgat1         | -1.3272204  |
| Porcn         | 1.2435916  | Zfp638        | -1.32679034 |
| Acin1         | 1.2429438  | Ndfip2        | -1.3266206  |
| Elov14        | 1.2427836  | Plin4         | -1.3262734  |
| Psm13         | 1.2426224  | Slc25a36      | -1.325491   |
| Il13          | 1.2418094  | Plekhm3       | -1.3254128  |
| Gm11961       | 1.24148632 | Wdr3          | -1.3253612  |
| Tlx1          | 1.241005   | Pbx2          | -1.3247862  |
| Arhgap4       | 1.2408259  | Metap1d       | -1.32305788 |
| Chmp6         | 1.2407208  | Vps13c        | -1.32291126 |
| Acsf2         | 1.23998452 | Fam133b       | -1.32279586 |

|               |            |               |             |
|---------------|------------|---------------|-------------|
| Slc36a2       | 1.23933792 | Setd5         | -1.31958294 |
| Setdb2        | 1.2385578  | Sp4           | -1.31772232 |
| LOC101056001  | 1.23832368 | Prpf4b        | -1.3162002  |
| Gm34028       | 1.2359116  | Bglap3        | -1.3142962  |
| Ctnnb1        | 1.235754   | Cdk19         | -1.3139558  |
| Ublcp1        | 1.2355394  | Rasa1         | -1.3132701  |
| Gm9510        | 1.2348518  | Pcgf5         | -1.31245088 |
| Scgb2b20      | 1.234065   | Pdk4          | -1.31214855 |
| Fblim1        | 1.2339006  | Cpeb4         | -1.31214046 |
| Tshz3         | 1.2338059  | Zdhhc23       | -1.3120823  |
| Dhcr24        | 1.2331767  | Sh3rf1        | -1.3114481  |
| Msrb2         | 1.2331758  | Tmem56        | -1.3080759  |
| St3gal4       | 1.2329984  | Edrf1         | -1.3072386  |
| Myl4          | 1.232388   | Cep170        | -1.307117   |
| Gm9916        | 1.2314158  | Nsd1          | -1.30639172 |
| Gm10427       | 1.2303381  | 5730455P16Rik | -1.30484366 |
| Ppih          | 1.2302728  | Defb1         | -1.3044095  |
| Pramel1       | 1.2298026  | Ocln          | -1.3039928  |
| Ctse          | 1.2287817  | C1galt1       | -1.3039856  |
| Nudt6         | 1.2285542  | Rasgef1a      | -1.3034377  |
| Tnpo2         | 1.22787332 | Lipe          | -1.3033566  |
| Msmo1         | 1.22720146 | Kdm2a         | -1.3025746  |
| Ly6c1         | 1.22715234 | Ctnnb1        | -1.30236148 |
| Lats2         | 1.22655774 | Rmnd5a        | -1.30226994 |
| Adam1b        | 1.2257304  | Pgm211        | -1.30107928 |
| Gm35438       | 1.22554588 | Tmem64        | -1.3008852  |
| Cuedc1        | 1.2254262  | N4bp2l2       | -1.299964   |
| 2610528J11Rik | 1.22509432 | Capn10        | -1.299551   |
| Gm32191       | 1.2233424  | 4931428F04Rik | -1.2984338  |
| Slc35a2       | 1.22300148 | Slc19a2       | -1.2984166  |
| Nr5a1         | 1.2220521  | Gm33558       | -1.2978006  |
| Sqstm1        | 1.2209144  | Lpin2         | -1.29779292 |
| Gm7337        | 1.2207294  | Zfp607        | -1.29775334 |
| Rnf144b       | 1.2204866  | Adamtsl4      | -1.29729414 |
| Wnt7b         | 1.21996188 | E330009J07Rik | -1.297184   |
| Nos3          | 1.2188558  | Snx18         | -1.2956328  |
| Ano10         | 1.21866512 | Rictor        | -1.295198   |
| Gm33778       | 1.2183256  | Glis3         | -1.29461432 |
| Fgd3          | 1.218128   | Sdc4          | -1.29457615 |



|               |            |          |             |
|---------------|------------|----------|-------------|
| Gtf2i         | 1.21670246 | Mme11    | -1.29420328 |
| Golm1         | 1.216104   | Mmgt1    | -1.2938042  |
| Gm10785       | 1.215476   | Snhg20   | -1.2930851  |
| 4933411K16Rik | 1.2149043  | Prepl    | -1.29251934 |
| Rhobtb3       | 1.2145372  | Zdhhc17  | -1.29223346 |
| Slc7a7        | 1.2139158  | Nfat5    | -1.29181766 |
| Map3k7        | 1.2137194  | Tbc1d8   | -1.2909255  |
| Hmgcs1        | 1.2136817  | Ttll5    | -1.29073334 |
| Abcc5         | 1.21271228 | Hoxd9    | -1.29030632 |
| 2410022M11Rik | 1.21269226 | Usp53    | -1.2902784  |
| Gart          | 1.2118013  | Ptpn14   | -1.290185   |
| Utp14b        | 1.21120548 | Qser1    | -1.28945828 |
| Gm4319        | 1.2109404  | Rc3h1    | -1.2875958  |
| Hsd3b4        | 1.210686   | Arid4b   | -1.28534174 |
| 8-Sep         | 1.21041488 | Abhd3    | -1.2843404  |
| 5930412G12Rik | 1.2101574  | Baz2b    | -1.2842012  |
| Gm10183       | 1.2101345  | Rnf39    | -1.2829718  |
| Fgd1          | 1.208766   | Neat1    | -1.2827292  |
| Gm38407       | 1.2087102  | Kdm5b    | -1.28133774 |
| Meis1         | 1.20767952 | Cald1    | -1.2806916  |
| Rhbdl1        | 1.207675   | Amz2     | -1.2800517  |
| Olfr1375      | 1.206655   | Dyrk1a   | -1.27987052 |
| Fcgr4         | 1.20598888 | Arrb2    | -1.27962494 |
| Tmem61        | 1.20591592 | Paip1    | -1.2795844  |
| Gm29260       | 1.2056551  | Al195381 | -1.2794728  |
| AA619741      | 1.2052393  | Catsper1 | -1.2792282  |
| Stox2         | 1.2047238  | lkbkg    | -1.2792201  |
| Ophn1         | 1.2043762  | G2e3     | -1.2788796  |
| Tmco4         | 1.2043242  | Hmbox1   | -1.2787084  |
| Cidea         | 1.20348454 | Cald1    | -1.2786408  |
| Map4          | 1.2020726  | Kctd20   | -1.2782669  |
| Usp37         | 1.2019267  | Bard1    | -1.2781386  |
| Olfr153       | 1.2013011  | Pofut1   | -1.2776947  |
| Gm10125       | 1.2009573  | Nt5c3    | -1.2773066  |
| Gfm2          | 1.200428   | Al845619 | -1.2766094  |
| Cars2         | 1.199841   | Cep41    | -1.27655292 |
| AF067063      | 1.19955348 | Txlng    | -1.27561474 |
| Neto1         | 1.1991978  | Atp2c1   | -1.2750898  |
| 1700029F12Rik | 1.1975184  | Barx2    | -1.2746744  |

|               |            |               |             |
|---------------|------------|---------------|-------------|
| Habp2         | 1.1972475  | Myo5b         | -1.27378274 |
| Gm5105        | 1.1968498  | Hif1a         | -1.2724152  |
| Gm21637       | 1.1964126  | Nexn          | -1.2719068  |
| Obox1         | 1.1957402  | 2610005L07Rik | -1.2711058  |
| Gm16096       | 1.19551992 | Dnajib4       | -1.2707     |
| 6030442E23Rik | 1.1953721  | AA645497      | -1.2706494  |
| lkbkb         | 1.19516683 | Gcc2          | -1.2703438  |
| lft46         | 1.1946311  | Dusp12        | -1.26962    |
| Dleu2         | 1.1934524  | lgsf3         | -1.2685018  |
| BC024386      | 1.1933389  | Kansl1l       | -1.2678647  |
| Sirt4         | 1.1925988  | 4930539E08Rik | -1.2667594  |
| lfit3b        | 1.19248985 | Kcnh7         | -1.26623083 |
| Car11         | 1.1924806  | Mtrf1         | -1.2660918  |
| Slc28a1       | 1.1917782  | Ankrd37       | -1.26518012 |
| Gnpda1        | 1.1908307  | Gng10         | -1.2644878  |
| Phf19         | 1.1904922  | Hivep2        | -1.2634316  |
| Tcl1b2        | 1.190186   | Zmat3         | -1.2629786  |
| Olfr1168      | 1.1895228  | Plekha1       | -1.262825   |
| Gm6934        | 1.1894812  | Brwd1         | -1.2623596  |
| Gsto1         | 1.18668128 | Sptbn2        | -1.26228332 |
| Kri1          | 1.1865108  | Scn1b         | -1.26096154 |
| Rbm5          | 1.18639946 | Lifr          | -1.2608285  |
| ltgb7         | 1.18634654 | lkbkg         | -1.26054313 |
| Myo9a         | 1.18634366 | Kazald1       | -1.26054    |
| Tspan18       | 1.18613386 | Ddx5          | -1.260232   |
| St8sia1       | 1.1853757  | Mllt10        | -1.2600112  |
| Prlh          | 1.1836605  | Arvcf         | -1.25974608 |
| Agpat2        | 1.1824784  | Plcb3         | -1.2596822  |
| Mkrn2os       | 1.182272   | Cish          | -1.2593312  |
| Angpt2        | 1.18005228 | Syt13         | -1.2589292  |
| 4931431B13Rik | 1.1798434  | Dock1         | -1.2585816  |
| Fyco1         | 1.1796462  | Eif4e2        | -1.25783968 |
| Olfr1115      | 1.17962814 | Acvrl1        | -1.25773048 |
| Lpar6         | 1.1762138  | 5830427D02Rik | -1.2572768  |
| AU022793      | 1.1760388  | Tgfbr3        | -1.25710488 |
| Sh3tc1        | 1.1757684  | Ssna1         | -1.2569976  |
| Narfl         | 1.1751432  | Vsx1          | -1.2564907  |
| Nuak2         | 1.1745114  | Efr3a         | -1.2563972  |
| Ly6c2         | 1.1743245  | 2610005L07Rik | -1.2561593  |

|               |            |         |             |
|---------------|------------|---------|-------------|
| Icam4         | 1.1738503  | Camsap2 | -1.2560358  |
| Trappc12      | 1.173665   | Ugdh    | -1.25592852 |
| Fam69c        | 1.17344687 | Txnrd2  | -1.255322   |
| Itih4         | 1.1730742  | Lrg1    | -1.25522754 |
| Pls3          | 1.1727528  | Trmt13  | -1.25504494 |
| P3h4          | 1.17273426 | Zfp617  | -1.2549856  |
| Gm32817       | 1.1720118  | Mcoln1  | -1.2548752  |
| Zfp296        | 1.17169666 | Mcc     | -1.2546711  |
| Specc1        | 1.1709576  | Pkd2l2  | -1.2543426  |
| Fads2         | 1.169846   | Rad17   | -1.2542558  |
| Lgr6          | 1.16947032 | Dnajb14 | -1.25237108 |
| Olf930        | 1.1688664  | Csnk1e  | -1.25071    |
| 6430710C18Rik | 1.1684122  | Smg1    | -1.2506423  |
| Bbx           | 1.16802692 | Tbc1d14 | -1.2504396  |
| N4bp1         | 1.1680002  | Rbbp6   | -1.25011254 |
| Wnt7b         | 1.1669674  | Fam212b | -1.25009632 |
| Doxl2         | 1.1663594  | Fam162a | -1.24982882 |
| 1810024B03Rik | 1.1661191  | Ghr     | -1.24965    |
| Mcts1         | 1.1656766  | Ccnt2   | -1.2496042  |
| Glb1          | 1.1654978  | Scaper  | -1.24869728 |
| Pde3b         | 1.1651416  | Ggnbp1  | -1.24852848 |
| Tmem196       | 1.1650948  | Fut1    | -1.2468324  |
| Cenpk         | 1.1650772  | Ebf4    | -1.245933   |
| Rnase11       | 1.1647658  | Vwa5a   | -1.24588108 |
| Ramp1         | 1.16472768 | Znrf1   | -1.24551392 |
| Opcml         | 1.1638341  | Llg1    | -1.24526166 |
| Serpib9       | 1.163619   | Nr1d2   | -1.2441196  |
| Ppt1          | 1.1633792  | Mvp     | -1.243556   |
| Spats2        | 1.1629434  | Foxo1   | -1.2435264  |
| Spag17os      | 1.1627369  | Glg1    | -1.242796   |
| Smok3b        | 1.1614566  | Mylpf   | -1.24218606 |
| LOC545005     | 1.1614304  | Prkar1b | -1.2420774  |
| Tmprss9       | 1.1612534  | Prss57  | -1.2419107  |
| Cep89         | 1.16092492 | Adprh   | -1.2411308  |
| Tigar         | 1.1606054  | Mgea5   | -1.24101448 |
| Scfd2         | 1.15948772 | Pcf11   | -1.2403584  |
| Acss2         | 1.1592269  | Rcan3   | -1.24022532 |
| Gm35313       | 1.1587224  | Tnrc6c  | -1.23996686 |
| Adck2         | 1.1582308  | Myo5a   | -1.2387626  |

|               |            |               |             |
|---------------|------------|---------------|-------------|
| C130063K03Rik | 1.1579752  | Ybx1          | -1.2382584  |
| Fev           | 1.1575079  | Slc9a9        | -1.2371538  |
| Gm8884        | 1.1569214  | Fgl2          | -1.2369337  |
| Cptp          | 1.15613032 | Ccdc91        | -1.236486   |
| Mtap          | 1.15528012 | Tollip        | -1.23575186 |
| Rrp1b         | 1.15518545 | Zscan22       | -1.2349086  |
| Tmem241       | 1.15435886 | Socs4         | -1.2344594  |
| Tmem123       | 1.153997   | Ulk3          | -1.23440314 |
| Slc18a1       | 1.1536734  | Ift74         | -1.23379994 |
| Cux1          | 1.15352154 | Trib1         | -1.2330422  |
| Ncor2         | 1.153214   | Plekhg5       | -1.23248076 |
| Gm11733       | 1.152461   | Mat2b         | -1.23191834 |
| Mtx1          | 1.15173006 | A930004D18Rik | -1.23171688 |
| Gm21637       | 1.1512227  | BC030336      | -1.2316084  |
| Auts2         | 1.15042686 | 1110038F14Rik | -1.2315516  |
| Olfir609      | 1.15038014 | Aen           | -1.23100613 |
| Pdxk          | 1.1496658  | Zfp169        | -1.23040246 |
| Zfp956        | 1.1487574  | Fem1c         | -1.2300229  |
| Ablim1        | 1.1486907  | Ypel3         | -1.2298665  |
| Slc30a8       | 1.14821    | Svil          | -1.2297902  |
| Itih4         | 1.1474404  | Tmc3          | -1.228935   |
| Sned1         | 1.1474214  | Lrrcc1        | -1.22888852 |
| Ikzf3         | 1.147121   | Rap2a         | -1.228414   |
| Gtf2h4        | 1.1471052  | B130052P14Rik | -1.22839928 |
| Dock5         | 1.1470368  | Atp8a1        | -1.2282558  |
| BC043934      | 1.1457553  | Zfp940        | -1.22745514 |
| Bcar1         | 1.1456208  | Bcor          | -1.226593   |
| Dgat2         | 1.1448412  | Nudt5         | -1.2252726  |
| Tceal8        | 1.14455652 | Tmem234       | -1.2251206  |
| Alg6          | 1.1444745  | Prpf40a       | -1.2249279  |
| Cyp1a1        | 1.14403868 | Pou2f1        | -1.2234478  |
| Ndr3          | 1.1438694  | 1700017B05Rik | -1.2225676  |
| Defa1         | 1.1434846  | Fbxl16        | -1.22249794 |
| Gimap9        | 1.1431398  | Myo1e         | -1.2220454  |
| Oprl1         | 1.14202834 | Camk2b        | -1.2218518  |
| Cox10         | 1.1419826  | Frat1         | -1.2210648  |
| Snx30         | 1.1406102  | Pold3         | -1.2209706  |
| Jdp2          | 1.1394548  | Mapk8ip3      | -1.220592   |
| Olfir806      | 1.13896512 | Gnb1l         | -1.21995354 |

|               |            |               |             |
|---------------|------------|---------------|-------------|
| 2700046G09Rik | 1.13864088 | H2-T24        | -1.2196794  |
| Gpr39         | 1.1385536  | Ufl1          | -1.217818   |
| Maz           | 1.13845872 | 2610319H10Rik | -1.2174926  |
| Wfikkn1       | 1.1371612  | Ptpn6         | -1.2167809  |
| Gt(ROSA)26Sor | 1.13675308 | Rock2         | -1.2160554  |
| C330007P06Rik | 1.1347537  | Ptges         | -1.21561025 |
| Olf139        | 1.1346574  | Lamc2         | -1.2154026  |
| Anxa3         | 1.13464832 | Crtc3         | -1.2145977  |
| Nme7          | 1.1343246  | 1700088E04Rik | -1.214088   |
| Ndufs8        | 1.1343198  | Raet1a        | -1.2137442  |
| Phf6          | 1.133842   | Trim23        | -1.2134666  |
| Plk3          | 1.1329064  | Dym           | -1.21258688 |
| Dolpp1        | 1.1326499  | Pgf           | -1.21215772 |
| Th            | 1.1324029  | Fam46c        | -1.21199226 |
| Fastkd5       | 1.13206912 | Ing3          | -1.2118106  |
| Ctif          | 1.131701   | Pcf11         | -1.21073008 |
| Gsn           | 1.13167334 | Enpp2         | -1.2105958  |
| Gm3002        | 1.13139248 | Klhl42        | -1.20921088 |
| Kcnn3         | 1.13120412 | Trdmt1        | -1.2078812  |
| Pkd1l2        | 1.1301856  | Braf          | -1.20778132 |
| Lhfp          | 1.12959052 | Insig2        | -1.2074046  |
| Speer4a       | 1.1292968  | Prpf4b        | -1.2070064  |
| Olf196        | 1.1286712  | Mbtd1         | -1.2058062  |
| Gm10220       | 1.1283002  | Socs2         | -1.2045336  |
| Olf1279       | 1.12826872 | Setx          | -1.20379686 |
| LOC101055630  | 1.12745546 | Cables1       | -1.2034474  |
| 9030619P08Rik | 1.1273298  | AA474331      | -1.20319008 |
| Nanos3        | 1.1272798  | Proca1        | -1.2031038  |
| Fblim1        | 1.1272388  | Mob1b         | -1.2026544  |
| Enho          | 1.1267986  | Ewsr1         | -1.20224    |
| Phykp1        | 1.1264424  | Krtcap3       | -1.20169327 |
| Tesc          | 1.1263804  | Tbc1d9b       | -1.2015853  |
| Lynx1         | 1.12603808 | Eps15l1       | -1.20154954 |
| Rnu1a1        | 1.1259008  | Rsb1l1        | -1.2003727  |
| Pip5kl1       | 1.1257124  | Cdkn1b        | -1.2001824  |
| Serp1b6b      | 1.12552166 | Insr          | -1.20003032 |
| Kat6b         | 1.1253996  | Pde7a         | -1.1999988  |
| Gstt1         | 1.1243992  | Asxl2         | -1.199636   |
| Spata9        | 1.124248   | Tmem135       | -1.1988006  |

|               |            |               |             |
|---------------|------------|---------------|-------------|
| Ghrl          | 1.12413406 | Fubp1         | -1.1981406  |
| Ncl           | 1.123786   | Kdelc1        | -1.19806146 |
| Atp6v1g2      | 1.1234794  | Desi2         | -1.19694232 |
| Brdt          | 1.1232128  | Zdhhc24       | -1.196876   |
| Galns         | 1.123147   | Card6         | -1.1968098  |
| LOC102642189  | 1.1228294  | Pvt1          | -1.1957428  |
| Gm31649       | 1.1206484  | Casp3         | -1.1946783  |
| Spin2d        | 1.1205039  | Smtnl2        | -1.19265128 |
| Msn           | 1.1200852  | Tbc1d20       | -1.1923738  |
| Syt6          | 1.11880494 | Dusp8         | -1.192205   |
| Syt5          | 1.11824108 | Wdr70         | -1.1915708  |
| Gm31493       | 1.1169448  | Fbxw27        | -1.1912212  |
| D930007P13Rik | 1.11681748 | Cep170b       | -1.19121026 |
| Pwp1          | 1.11662292 | Tbl2          | -1.1911096  |
| Tomm40        | 1.1165008  | Tceb3         | -1.19099712 |
| Lag3          | 1.1162768  | 2310009B15Rik | -1.190928   |
| Nphp1         | 1.1161036  | Sos1          | -1.1902709  |
| Hmgn5         | 1.1157446  | Eps8          | -1.1902626  |
| Krt2          | 1.1141624  | Ugdh          | -1.18989706 |
| E230006M18Rik | 1.11336852 | Plekhh1       | -1.18949032 |
| Ccdc33        | 1.11275148 | Rnf41         | -1.1883226  |
| Ddx55         | 1.1125546  | Nadk2         | -1.1879458  |
| Ccdc90b       | 1.1122188  | Fbxl20        | -1.1878714  |
| Gm7609        | 1.1121826  | Ang6          | -1.18783474 |
| Slc35d2       | 1.112046   | Pitpnm2       | -1.18762732 |
| Cdh6          | 1.1120186  | Cxadr         | -1.1861396  |
| 1600015I10Rik | 1.11191368 | Slc9a6        | -1.18584728 |
| Zbtb9         | 1.1117196  | Dtd1          | -1.1855702  |
| Lipt2         | 1.11110474 | Tor1b         | -1.1843982  |
| Tspan17       | 1.11085034 | Synj2         | -1.18436    |
| Nlgn3         | 1.1102238  | Vegfa         | -1.18406152 |
| Olfr1170      | 1.10969066 | Kit           | -1.1837106  |
| Fgd3          | 1.10967494 | Usp6nl        | -1.1829724  |
| Kncn          | 1.1093576  | Numb          | -1.18292428 |
| Tbc1d24       | 1.1092682  | Zcchc3        | -1.18289972 |
| Olfr553       | 1.1090293  | Aen           | -1.18247845 |
| Gm19705       | 1.1086595  | Papalg        | -1.1822443  |
| Gcm2          | 1.1082325  | Psd3          | -1.1822033  |
| 9630001P10Rik | 1.1073594  | Cmtm2a        | -1.1817346  |

|               |            |               |             |
|---------------|------------|---------------|-------------|
| Gm39121       | 1.10645628 | Arhgef12      | -1.1815496  |
| Gm10872       | 1.10636186 | Lcorl         | -1.18109608 |
| Klc2          | 1.1062284  | Ilvbl         | -1.18079566 |
| Rnf213        | 1.10580324 | Chd1          | -1.18046092 |
| Lox           | 1.1057806  | Anxa4         | -1.1803524  |
| Sec14l1       | 1.1056352  | Arid5b        | -1.1795621  |
| Cr2           | 1.1055078  | Luc7l         | -1.17952872 |
| Gm19691       | 1.10538388 | Pik3c3        | -1.1786418  |
| Acin1         | 1.10518215 | Kat6b         | -1.1782904  |
| Wdr25         | 1.1040526  | Gtf2f2        | -1.1778574  |
| Frmpd1        | 1.10369086 | Armc7         | -1.1778174  |
| Tex101        | 1.10343934 | Shc4          | -1.17645692 |
| Rom1          | 1.1028428  | Limk2         | -1.17636346 |
| Hspg2         | 1.10270452 | Runx1         | -1.1740384  |
| Fads1         | 1.1023662  | Gm3556        | -1.174037   |
| Ncf2          | 1.1020374  | Nlrp4c        | -1.17390632 |
| Lck           | 1.10131406 | Brwd1         | -1.1729994  |
| A430106A12Rik | 1.1007652  | Enthd2        | -1.17173768 |
| Ccbl1         | 1.1001072  | Zfp959        | -1.1716194  |
| Pofut2        | 1.0998692  | 1810020O05Rik | -1.1705389  |
| Gm13201       | 1.0998402  | Cep250        | -1.1700068  |
| Itih2         | 1.09974314 | Inadl         | -1.169548   |
| Cdhr4         | 1.0994568  | Zranb1        | -1.1695376  |
| Lrrc51        | 1.0981989  | Trp53inp1     | -1.16821814 |
| Plcb1         | 1.09818554 | 2310022B05Rik | -1.168004   |
| Tssk1         | 1.09662008 | Meaf6         | -1.1673422  |
| 2010109A12Rik | 1.09639788 | Mthfr         | -1.1659894  |
| Nqo2          | 1.0960064  | Gm4524        | -1.165915   |
| Tbx21         | 1.0959301  | Ctdspl2       | -1.1657269  |
| Lcp1          | 1.0959158  | Suz12         | -1.16566848 |
| 5031415H12Rik | 1.09556532 | LOC102641428  | -1.16535806 |
| Usp19         | 1.0955334  | Ttc14         | -1.16532612 |
| Gm32431       | 1.093833   | Cflar         | -1.1652074  |
| Gm14296       | 1.09360745 | H2-D1         | -1.16457226 |
| Kctd15        | 1.0922208  | Ankib1        | -1.16453934 |
| Chaf1b        | 1.0914011  | Brwd1         | -1.16440154 |
| Epdr1         | 1.09131    | Snx1          | -1.1642022  |
| Zkscan5       | 1.0910287  | Oas1g         | -1.1637642  |
| Cbl           | 1.09094954 | Col4a3bp      | -1.16370774 |

|               |            |          |             |
|---------------|------------|----------|-------------|
| E330012B07Rik | 1.0908582  | Tbc1d10b | -1.16353274 |
| Slc37a3       | 1.0906138  | Slc37a4  | -1.1631064  |
| Mbp           | 1.090404   | Polg     | -1.1624394  |
| Igbp1         | 1.0897441  | Aff4     | -1.1618896  |
| Zc3h3         | 1.08933354 | Lgr4     | -1.16181708 |
| Aurkb         | 1.08907128 | Mxi1     | -1.161747   |
| 2610318M16Rik | 1.0877533  | Susd2    | -1.1615512  |
| Trub1         | 1.08758212 | Kank3    | -1.16095734 |
| Mmp17         | 1.08654928 | Myo1b    | -1.16023112 |
| Ralb          | 1.08645675 | Unkl     | -1.16008234 |
| Pelp1         | 1.08596706 | Tmem141  | -1.15979052 |
| Ldb3          | 1.08541728 | Bcas3    | -1.1597204  |
| Ffar3         | 1.0850158  | Ccnl1    | -1.1596942  |
| Camta2        | 1.08500672 | Usp18    | -1.158495   |
| Gm3219        | 1.08440732 | Srsf5    | -1.1583982  |
| Mrps27        | 1.084012   | Tpi1     | -1.15809773 |
| Pdp2          | 1.0832572  | Vps4b    | -1.15748168 |
| Sema3f        | 1.0830874  | Tpi1     | -1.1573329  |
| Gm31588       | 1.0826004  | Srrm1    | -1.15721988 |
| Tex35         | 1.0823464  | Zfp729a  | -1.1567364  |
| Nrxn2         | 1.0816894  | Gm608    | -1.1565795  |
| Zfp385c       | 1.0814762  | Rbm26    | -1.1562304  |
| Gstm7         | 1.0813179  | Pus7     | -1.1556482  |
| Gm36849       | 1.0811098  | Klhdc9   | -1.1555738  |
| C1qtnf1       | 1.08040546 | Tmem38a  | -1.1554985  |
| C230085N15Rik | 1.079988   | Gm16049  | -1.15499592 |
| A430048G15Rik | 1.07992172 | Txnip    | -1.15489053 |
| Mboat1        | 1.0795827  | Rgs11    | -1.1539006  |
| Nt5m          | 1.07934952 | Gzf1     | -1.15336752 |
| Zfp827        | 1.0791554  | Nfkbiz   | -1.1533408  |
| Gm36365       | 1.0791354  | Ezh1     | -1.1531906  |
| Gm35472       | 1.0791092  | Zfp53    | -1.15243388 |
| Gm29155       | 1.0786018  | Nup54    | -1.1520834  |
| Shcbp1l       | 1.0783978  | Ddx17    | -1.15207245 |
| Gm10463       | 1.07827806 | Srp54a   | -1.15205288 |
| N4bp3         | 1.07777166 | Gid4     | -1.1509614  |
| 2900011F02Rik | 1.07768488 | Zfc3h1   | -1.1501908  |
| Tmem62        | 1.07764912 | Tra2b    | -1.1489029  |
| Vmn2r97       | 1.0758238  | Uchl1    | -1.14876414 |



|               |            |          |             |
|---------------|------------|----------|-------------|
| Daf2          | 1.07580852 | Mtf1     | -1.1486888  |
| Neurog1       | 1.07535028 | Fut2     | -1.1485992  |
| Nlrp1a        | 1.07494405 | Syp      | -1.1481061  |
| Arhgap9       | 1.0748238  | Ibtk     | -1.1479888  |
| LOC105244782  | 1.0738142  | Edn1     | -1.14773894 |
| Tssk3         | 1.0730998  | Fut1     | -1.1474528  |
| Themis2       | 1.07307768 | Tbc1d23  | -1.1470142  |
| LOC102639683  | 1.07276868 | Dhx40    | -1.14699412 |
| Olf1026       | 1.0723062  | Tmtc3    | -1.1467142  |
| Lrwd1         | 1.0721274  | Phf3     | -1.1425824  |
| Pmepa1        | 1.071929   | Msl1     | -1.14224    |
| Psmg3         | 1.071013   | Dyrk3    | -1.1413198  |
| LOC552909     | 1.070889   | Rbm15b   | -1.14085794 |
| Mei1          | 1.0702124  | Gm12082  | -1.1404238  |
| Dsc3          | 1.06956768 | Pcmt1    | -1.14034652 |
| Aspa          | 1.0690341  | Sergef   | -1.1403082  |
| Acot7         | 1.0686374  | Emc2     | -1.1380754  |
| Obfc1         | 1.06839252 | Gtpbp2   | -1.1377564  |
| Homer3        | 1.0677218  | Wwp1     | -1.1365776  |
| 1700025G04Rik | 1.06713772 | Vprbp    | -1.1361628  |
| Prkd2         | 1.0670734  | Sfxn5    | -1.1359778  |
| 9230110C19Rik | 1.06682586 | Gm42035  | -1.13561916 |
| Adgrg2        | 1.0668096  | Rpp14    | -1.1352262  |
| E2f3          | 1.0659652  | Apobec3  | -1.1349716  |
| Phactr2       | 1.0656424  | Rrm2b    | -1.1348488  |
| Efr3b         | 1.0653958  | Stxbp5   | -1.13461972 |
| Sncb          | 1.0652642  | Slc25a27 | -1.1342564  |
| 10-Mar        | 1.0650702  | Setx     | -1.1342552  |
| Slc28a2       | 1.0646796  | Crebrf   | -1.1340475  |
| Tiam1         | 1.064456   | Nol10    | -1.13337967 |
| Pld3          | 1.0641494  | Snx14    | -1.13328004 |
| Gm35786       | 1.06383132 | Sbno2    | -1.1311684  |
| Det1          | 1.06377554 | Dnm2     | -1.1311312  |
| LOC105246799  | 1.0636959  | Nat6     | -1.130961   |
| Tat           | 1.0636053  | Gdi1     | -1.13080454 |
| LOC105243826  | 1.0632124  | Aagab    | -1.130693   |
| Snx29         | 1.0631547  | Wee1     | -1.1300316  |
| Urm1          | 1.0631218  | Tbc1d15  | -1.1300292  |
| 4931428F04Rik | 1.0626476  | Per3     | -1.1292882  |

|               |            |               |             |
|---------------|------------|---------------|-------------|
| Tmem97        | 1.0625462  | Igip          | -1.1289148  |
| Gm26511       | 1.0624418  | Cipc          | -1.1283264  |
| Zbtb12        | 1.062264   | Vcp           | -1.1282258  |
| Bspry         | 1.06221008 | Pomt2         | -1.12752008 |
| E030025P04Rik | 1.0620675  | Ggps1         | -1.1274328  |
| Fmod          | 1.06181192 | Tbl1xr1       | -1.1264982  |
| Msto1         | 1.0614862  | Hook3         | -1.1256428  |
| Rragd         | 1.061285   | Arih1         | -1.1254768  |
| Olf885        | 1.0607972  | Ccdc152       | -1.12521886 |
| Mtus1         | 1.05854892 | Mettl6        | -1.12516594 |
| Pla2g4c       | 1.0584478  | Arid5a        | -1.12495708 |
| Cgnl1         | 1.058331   | I17rd         | -1.1239366  |
| Lrrtm4        | 1.05723668 | Zfp148        | -1.12358188 |
| Med18         | 1.0572009  | Osbp11        | -1.1234808  |
| Igf2bp2       | 1.0568657  | Pkd2          | -1.1230855  |
| Coro7         | 1.05675294 | Dmtf1         | -1.122776   |
| Pik3r4        | 1.0559349  | Sbsn          | -1.12275266 |
| Nctc1         | 1.0550246  | Brf1          | -1.12218714 |
| 5330432E05Rik | 1.0549941  | Wls           | -1.1218481  |
| Cxx1a         | 1.05408192 | Wdr47         | -1.12178994 |
| Tmem52        | 1.0527816  | 9130007G19Rik | -1.1216073  |
| Slc35b2       | 1.05273866 | Stim2         | -1.12154532 |
| Sirt7         | 1.0526152  | Pcm1          | -1.1212826  |
| Fcor          | 1.05156612 | Vps13a        | -1.121016   |
| D1Ertd704e    | 1.05082512 | Rec8          | -1.120873   |
| Fbxw25        | 1.0503826  | Fndc3b        | -1.1199665  |
| Gm36159       | 1.0499268  | Atp2a2        | -1.11976432 |
| Dact2         | 1.04848935 | Sun2          | -1.1195855  |
| Rabep1        | 1.0483394  | Gpn3          | -1.11951112 |
| 1700066C05Rik | 1.04789448 | Mark3         | -1.1183124  |
| Krtap4-16     | 1.0475884  | Tnpo1         | -1.1180048  |
| Ptprb         | 1.04730155 | Arhgef12      | -1.117909   |
| Usp13         | 1.0471263  | Pkd2l2        | -1.117902   |
| Ttc3          | 1.0463638  | Tlcd2         | -1.11748886 |
| Pigu          | 1.04555988 | Hist1h1c      | -1.1171598  |
| Tmem53        | 1.0454006  | Ankrd17       | -1.1169062  |
| 3110039I08Rik | 1.04533768 | Kif9          | -1.1162972  |
| Fam149a       | 1.04515648 | Zfr           | -1.1162815  |
| Pdpn          | 1.0444322  | Commd8        | -1.11600112 |

|               |            |               |             |
|---------------|------------|---------------|-------------|
| Pla2g10os     | 1.044424   | Ptpn13        | -1.1160006  |
| Mpv17l2       | 1.0442944  | Mettl21c      | -1.1148634  |
| Fmo1          | 1.04404974 | Zbtb16        | -1.11477328 |
| LOC545198     | 1.043756   | Fam175b       | -1.11350728 |
| Ube4a         | 1.0432148  | Spata5        | -1.11329794 |
| Thap1         | 1.0430236  | Fam214a       | -1.11175632 |
| Tcp11l2       | 1.043004   | Zfp110        | -1.1112728  |
| Rasgrp4       | 1.04220008 | Ankrd10       | -1.11120748 |
| Fam101b       | 1.041508   | Sun1          | -1.1111426  |
| C4b           | 1.0411315  | Lin7c         | -1.11093808 |
| Adcy10        | 1.040988   | Hinfp         | -1.1108332  |
| Secisbp2      | 1.04083774 | Papd7         | -1.110456   |
| Gm4836        | 1.0408349  | 4833420D23Rik | -1.1100984  |
| 1500011B03Rik | 1.04054094 | Sipa1         | -1.1097078  |
| Mro           | 1.04047966 | Hip1r         | -1.1095128  |
| Mark2         | 1.0402036  | Snora81       | -1.1083756  |
| Speer4cos     | 1.04000568 | D17H6S56E-5   | -1.1072707  |
| Stab2         | 1.0399723  | Vangl1        | -1.1068573  |
| Gm2491        | 1.0396996  | Zfp292        | -1.1067605  |
| Gm3896        | 1.03904008 | Me2           | -1.1067462  |
| Fstl1         | 1.0389953  | Mettl6        | -1.1061654  |
| Slc6a16       | 1.0389638  | Eif4enif1     | -1.10562754 |
| Grin2b        | 1.03874826 | Slc35f5       | -1.105144   |
| 6330566A10Rik | 1.0383864  | H13           | -1.10502672 |
| Barhl1        | 1.03824974 | Rsrp1         | -1.10455846 |
| Ttc28         | 1.0381634  | Birc6         | -1.10425186 |
| Gm29782       | 1.03805972 | Cnot6         | -1.103374   |
| 6530403M18Rik | 1.0378442  | Zbtb16        | -1.10330152 |
| Il15ra        | 1.03755332 | Maff          | -1.1028376  |
| Lamc2         | 1.0373282  | Ginm1         | -1.10236692 |
| Atm           | 1.0369902  | Gnl1          | -1.10220932 |
| Vegfc         | 1.03657628 | Phldb3        | -1.10175466 |
| Mgl2          | 1.0364385  | Meis3         | -1.10165692 |
| Ms4a1         | 1.0363832  | Mb21d1        | -1.10096097 |
| Sema4c        | 1.03623772 | Gpatch8       | -1.1005969  |
| Ankub1        | 1.036036   | Nuak1         | -1.0992332  |
| Gpa33         | 1.03570652 | Eif4a2        | -1.0988636  |
| Slc7a12       | 1.03509426 | Heatr1        | -1.09870026 |
| Il27ra        | 1.0345168  | Tsr3          | -1.0977218  |

|               |            |               |             |
|---------------|------------|---------------|-------------|
| Pdha1         | 1.0343032  | Pnrc1         | -1.0976286  |
| D8Ertd82e     | 1.03299094 | Slc7a11       | -1.0976062  |
| Esrrb         | 1.0329166  | Arid1b        | -1.0973454  |
| Dlat          | 1.032655   | Espn          | -1.0973115  |
| Dnmt3b        | 1.0323444  | Tcf12         | -1.0967436  |
| Tmem97        | 1.031919   | Per3          | -1.0958352  |
| Gm5953        | 1.0314426  | Rabgef1       | -1.09582    |
| Nr1h3         | 1.031043   | Myo7a         | -1.0956828  |
| Thra          | 1.03096628 | Pdk2          | -1.0950384  |
| Ttll5         | 1.0306974  | Gm20740       | -1.0949898  |
| Gart          | 1.0304856  | Herc2         | -1.094883   |
| Cox18         | 1.0304513  | Rai2          | -1.0948739  |
| Slbp          | 1.0304146  | Wdfy3         | -1.0940762  |
| Slc36a2       | 1.02978706 | 1810041L15Rik | -1.0940642  |
| Ccdc178       | 1.0296226  | Afg3l1        | -1.0939608  |
| 2310079G19Rik | 1.02909326 | Pik3r4        | -1.092977   |
| Dhx33         | 1.0290802  | Bcl3          | -1.0927644  |
| Col17a1       | 1.0289554  | Zdhhc22       | -1.092618   |
| 1810013A23Rik | 1.0289359  | Galt          | -1.0923548  |
| Foxn1         | 1.0288816  | Uba6          | -1.0921607  |
| Ly6f          | 1.02812    | Dgcr8         | -1.09199954 |
| Gm30302       | 1.02789212 | Ptprd         | -1.0919728  |
| Nup188        | 1.027637   | Arrb2         | -1.09084654 |
| Pou2f2        | 1.0272522  | Rad1          | -1.0907126  |
| Lmo4          | 1.0269642  | Sox4          | -1.09038494 |
| Lars2         | 1.0260482  | Col7a1        | -1.0903602  |
| Spaca7        | 1.026032   | Wdr92         | -1.0888939  |
| Tbc1d9b       | 1.0257526  | 2610201A13Rik | -1.0887752  |
| A930024N18Rik | 1.025537   | Fam220a       | -1.088439   |
| Pign          | 1.0246844  | Sltm          | -1.0883584  |
| Isca1         | 1.02464532 | Vwa5a         | -1.0882692  |
| Gm17746       | 1.024344   | Fosl2         | -1.08808754 |
| Dntt          | 1.02398634 | Agpat6        | -1.08804368 |
| Omp           | 1.0239854  | Cyp4f17       | -1.0880208  |
| Rangrf        | 1.02382612 | Gm7104        | -1.0872106  |
| Ces2a         | 1.0234971  | Gpatch8       | -1.0867128  |
| Cdh18         | 1.0221786  | Arid2         | -1.0865598  |
| Ppp2r5c       | 1.02205346 | Gtse1         | -1.086546   |
| Acacb         | 1.0215082  | Mir22hg       | -1.086474   |

|               |            |               |             |
|---------------|------------|---------------|-------------|
| Dock4         | 1.0212002  | Slc33a1       | -1.0864162  |
| Cgnl1         | 1.0207648  | Ppid          | -1.0861406  |
| Nt5m          | 1.02042294 | Elk4          | -1.0859384  |
| Cox6b2        | 1.0200839  | Gm34975       | -1.0858598  |
| Gm33058       | 1.0199051  | Rfc3          | -1.0854916  |
| Macc1         | 1.0198174  | Gprasp1       | -1.0853896  |
| C030009H01Rik | 1.01927852 | Mpp5          | -1.0853386  |
| Tox2          | 1.0191996  | Fam208b       | -1.0852666  |
| Cacng3        | 1.01899554 | Ranbp9        | -1.0846314  |
| Prss23        | 1.0184202  | P4ha2         | -1.0845818  |
| Cdk19         | 1.0183902  | Vbp1          | -1.084197   |
| Nfkbie        | 1.01773426 | Smchd1        | -1.0837722  |
| Lta4h         | 1.0176182  | Triobp        | -1.0835023  |
| Taf1b         | 1.017396   | Trim34a       | -1.08320834 |
| Dcun1d3       | 1.01628112 | Ip6k1         | -1.082892   |
| Cttn          | 1.0160513  | Phlpp1        | -1.0828762  |
| Scrn2         | 1.01530028 | Rsrc2         | -1.08281946 |
| Gm27211       | 1.01523448 | Adcy9         | -1.0825758  |
| Etv4          | 1.0151863  | Mcf2l         | -1.0822084  |
| Ccdc23        | 1.0147586  | Thyn1         | -1.08214426 |
| Sgk3          | 1.0139534  | Meis1         | -1.0820722  |
| 9530026F06Rik | 1.0138416  | Mfhas1        | -1.0819807  |
| Cited4        | 1.0137758  | Pcgf5         | -1.0818615  |
| Thap4         | 1.013505   | Gtpbp10       | -1.08154774 |
| Wnk2          | 1.0130458  | Gxylt1        | -1.0812807  |
| Pkhd1         | 1.0128388  | Ripk4         | -1.08095026 |
| 4930513D17Rik | 1.012248   | Uckl1os       | -1.08043194 |
| B230354K17Rik | 1.01128912 | A030001D20Rik | -1.07994772 |
| Ak8           | 1.0112462  | Alox12b       | -1.0797491  |
| Cdk5rap2      | 1.01010106 | Ggta1         | -1.07933    |
| Lipo1         | 1.0096674  | Lzic          | -1.0790382  |
| Lgals3        | 1.00932168 | Wrnip1        | -1.0786224  |
| 1700037C18Rik | 1.0092616  | AU024546      | -1.078587   |
| Otoa          | 1.0091896  | Rab5a         | -1.0785556  |
| Mapt          | 1.0089588  | Dapp1         | -1.0784416  |
| Lgalsl        | 1.0088005  | Rgmb          | -1.07842494 |
| Igfals        | 1.0088     | Sav1          | -1.0783734  |
| Gm29776       | 1.0087304  | Nvl           | -1.07805872 |
| Tnfaip8       | 1.0082688  | Lysmd3        | -1.07793712 |

|               |            |               |             |
|---------------|------------|---------------|-------------|
| Mrgpra4       | 1.00824334 | Nfe2l3        | -1.0778442  |
| Akna          | 1.008204   | Tubgcp3       | -1.07702208 |
| Prl3b1        | 1.0081692  | Zfyve19       | -1.07699012 |
| D17Zt10e      | 1.007493   | 2010204K13Rik | -1.0768556  |
| Zfp362        | 1.0070558  | Mrpl1         | -1.07670068 |
| Grin1os       | 1.0069256  | Vegfa         | -1.07649946 |
| Dnajc13       | 1.0062449  | Tcf7          | -1.0764637  |
| Atp6v0a1      | 1.0053654  | Lins          | -1.0758152  |
| Mcm4          | 1.0053339  | Fam63b        | -1.07565212 |
| Rptor         | 1.0051732  | Mxd4          | -1.07553768 |
| Nupr1l        | 1.0050869  | Gdpgp1        | -1.07551908 |
| 4933416M07Rik | 1.00506448 | Dohh          | -1.0754404  |
| Pms1          | 1.0046668  | Chdh          | -1.074976   |
| Gzmk          | 1.00302268 | Cpsf6         | -1.0747976  |
| Mpi           | 1.0029144  | Trio          | -1.074769   |
| Phf14         | 1.00231054 | Micu1         | -1.0745349  |
| Nkx2-1        | 1.001574   | Ccnd1         | -1.0743704  |
| Shc3          | 1.0014982  | Trmt2b        | -1.07409192 |
| Zfp786        | 1.0013452  | Usp33         | -1.0737882  |
| Tbc1d25       | 1.0007772  | C2cd3         | -1.0737505  |
| Nhlrc1        | 1.0004382  | Parp6         | -1.07374812 |
| Vps13d        | 1.00031519 | Ddb2          | -1.07364512 |
| Adam12        | 0.99930668 | Tmppe         | -1.0735774  |
| Gck           | 0.99919796 | Clk1          | -1.0733848  |
| Cyp2j8        | 0.99744344 | Fbxo28        | -1.0728388  |
| Gnrhr         | 0.9972606  | Gm765         | -1.0723972  |
| Traf1         | 0.9968071  | Rpap2         | -1.07234    |
| Gm11437       | 0.99646234 | Fdxr          | -1.07178306 |
| Olf1362       | 0.99640608 | Mga           | -1.0711446  |
| Pls3          | 0.99635268 | Hba-a1        | -1.0709138  |
| Snph          | 0.99577808 | Setd1a        | -1.0706754  |
| Oaz2          | 0.99565744 | AI839979      | -1.0700264  |
| Atp8a2        | 0.99536228 | Taok2         | -1.0686626  |
| Tfdp2         | 0.99372816 | Cpt1c         | -1.0681534  |
| Rgl3          | 0.9928026  | Pisd          | -1.0681057  |
| Tjp3          | 0.99177694 | Serinc5       | -1.06789588 |
| Erich6        | 0.9917488  | Pan2          | -1.06716012 |
| Dusp5         | 0.99167634 | Esco1         | -1.066504   |
| Klf4          | 0.99136686 | Tmem194       | -1.0659156  |

|               |            |           |             |
|---------------|------------|-----------|-------------|
| Olf933        | 0.9904032  | Rassf1    | -1.06494066 |
| Gm30948       | 0.99031544 | Sf3b1     | -1.0649004  |
| Afap1         | 0.9902997  | Fam71f2   | -1.0647988  |
| Flt1          | 0.9902048  | Klhl28    | -1.0644684  |
| Rhod          | 0.99005652 | Whamm     | -1.0641866  |
| Med22         | 0.98989392 | Rnf103    | -1.06407546 |
| H2-M5         | 0.98942996 | Foxo3     | -1.0639372  |
| Wfdc13        | 0.9894042  | Wdr41     | -1.06304192 |
| Defa24        | 0.98935032 | Vwa1      | -1.0626278  |
| LOC102643134  | 0.9893236  | Impad1    | -1.0624137  |
| Bmf           | 0.98907376 | Stam      | -1.06188106 |
| Speg          | 0.98871326 | Btg2      | -1.0616984  |
| Gm30092       | 0.98863006 | Abcc2     | -1.06159688 |
| Pgap2         | 0.98857212 | Ralgapb   | -1.0606594  |
| 1700072I22Rik | 0.98838854 | Map3k13   | -1.06032752 |
| Ltbp3         | 0.98820972 | Efemp1    | -1.0600658  |
| Gprc5a        | 0.98805952 | Dgka      | -1.0598545  |
| Usp5          | 0.98785686 | Trip4     | -1.059823   |
| LOC102643251  | 0.987443   | Inpp5j    | -1.0595355  |
| Entpd2        | 0.98740244 | Rabgef1   | -1.0593977  |
| 2810416G20Rik | 0.9870858  | Hist1h2bc | -1.0593     |
| Slc22a13      | 0.98708106 | Jag1      | -1.05865812 |
| Syt15         | 0.98680592 | Nuak1     | -1.05688954 |
| Ptgr1         | 0.9865732  | Prps1l3   | -1.055769   |
| Lamb3         | 0.98642826 | Slc16a7   | -1.05376672 |
| Odf4          | 0.9859886  | Gm10450   | -1.05337572 |
| Gm550         | 0.9856031  | Dirc2     | -1.0530348  |
| Tapbp         | 0.9851532  | Cnga1     | -1.05291008 |
| 9130403I23Rik | 0.98511266 | Igsf3     | -1.05284166 |
| Serpina1b     | 0.9850521  | Mdc1      | -1.05219508 |
| Cyp26b1       | 0.98417234 | Zbtb46    | -1.0521698  |
| Gxylt2        | 0.98327732 | Sec22b    | -1.0519876  |
| Pde6h         | 0.9832454  | Aen       | -1.051858   |
| 9-Mar         | 0.98248292 | Pga5      | -1.05151748 |
| Ntmt1         | 0.98225928 | Abhd15    | -1.05091048 |
| Gm1715        | 0.98225832 | Bicd1     | -1.05072808 |
| Pla2g4a       | 0.98205996 | Lrp12     | -1.0502968  |
| Ttc39a        | 0.9820304  | Casp2     | -1.04967928 |
| Fam189a2      | 0.98196936 | Ireb2     | -1.0495334  |

|               |            |               |             |
|---------------|------------|---------------|-------------|
| Adamts1       | 0.9818692  | Cebpa         | -1.04845952 |
| Vwf           | 0.98147106 | Lincpint      | -1.04842854 |
| Sptbn4        | 0.98139906 | Plekhf2       | -1.0479402  |
| 2810428I15Rik | 0.9807763  | Hist1h1e      | -1.0479164  |
| 2810002D19Rik | 0.9806552  | Cmtm2a        | -1.04785872 |
| Prl8a8        | 0.98045588 | Senp6         | -1.04754352 |
| Pdgfrl        | 0.98031234 | Cfl2          | -1.0472074  |
| Gm17455       | 0.98030257 | Lincpint      | -1.04693746 |
| B4galt2       | 0.97967386 | Mmadhc        | -1.0469203  |
| Skint5        | 0.97904872 | Bcl9          | -1.0462318  |
| Rims4         | 0.97857428 | Helq          | -1.0461123  |
| Slc6a13       | 0.97821    | Txnip         | -1.0460391  |
| 1700039E15Rik | 0.9769969  | Cdkn2d        | -1.045609   |
| Cnst          | 0.9766078  | Ammecr1       | -1.04543972 |
| Rnd3          | 0.97652864 | D730003I15Rik | -1.0448876  |
| Disp1         | 0.97599936 | Rnmt          | -1.044605   |
| Tuba1c        | 0.97447538 | Samhd1        | -1.044158   |
| Rxfp4         | 0.9743972  | Fgfr3         | -1.04406214 |
| Gm36394       | 0.9743886  | Ubt2          | -1.043932   |
| Pros1         | 0.97436904 | Pbx1          | -1.0434134  |
| Atp1a3        | 0.9730654  | Kitl          | -1.043405   |
| Col18a1       | 0.97247934 | Wdr92         | -1.0432072  |
| Gm6566        | 0.97213268 | Wrn           | -1.0432048  |
| B3galnt2      | 0.97151994 | Gde1          | -1.04290246 |
| 1700013F07Rik | 0.9714856  | Uhrf1bp1      | -1.04289914 |
| Cstf2         | 0.97147226 | Usp22         | -1.0426288  |
| Birc5         | 0.97134352 | Lmbr1l        | -1.0423264  |
| 4930570B17Rik | 0.97133112 | Lcmt2         | -1.0419817  |
| Lrrc28        | 0.9710388  | Dusp16        | -1.04186488 |
| Vmn1r25       | 0.97101974 | Slc4a4        | -1.0417848  |
| Ppp4r1l-ps    | 0.97081376 | Arhgef39      | -1.0417738  |
| Tyms          | 0.97043324 | Cep162        | -1.04176808 |
| Inhbb         | 0.97016048 | Ripk4         | -1.04150534 |
| Itgb2         | 0.96997452 | Gm8221        | -1.04138232 |
| P2rx1         | 0.9699402  | Akr1b10       | -1.041362   |
| Galt          | 0.96885634 | Zufsp         | -1.0412378  |
| Ano7          | 0.9687338  | Slc29a3       | -1.0407414  |
| Cyb5rl        | 0.96844388 | Gab2          | -1.0401854  |
| Trim41        | 0.96828652 | Kdm5b         | -1.039824   |



|               |            |               |             |
|---------------|------------|---------------|-------------|
| Ccdc33        | 0.9681792  | A130088B03Rik | -1.0395846  |
| 1700039I01Rik | 0.9680548  | Usp2          | -1.03945208 |
| 1500004A13Rik | 0.96792174 | Pgpep1        | -1.0393748  |
| Notch4        | 0.96724128 | Snx16         | -1.0387488  |
| Coq7          | 0.96706056 | Epc2          | -1.03868532 |
| Ppt1          | 0.9668355  | Arv1          | -1.0385132  |
| Dtwd2         | 0.9667883  | Ccdc127       | -1.037405   |
| Gm33308       | 0.9667735  | Haus3         | -1.0368366  |
| Tbc1d22b      | 0.96669722 | Il6st         | -1.03675032 |
| Hp            | 0.965755   | Gm15645       | -1.036294   |
| Dlx6os2       | 0.96567296 | Acin1         | -1.0357142  |
| Olf780        | 0.96559    | Eef2k         | -1.03563548 |
| Rps6ka1       | 0.9655862  | Rnf44         | -1.0350328  |
| Psph          | 0.96533156 | Gm9878        | -1.0348835  |
| Cacna1f       | 0.96490812 | Zscan29       | -1.034596   |
| Gm8378        | 0.96486474 | Gid4          | -1.0345831  |
| Fasl          | 0.96476794 | Psip1         | -1.0345182  |
| Flnc          | 0.96475648 | Cldn2         | -1.0344677  |
| Defa1         | 0.9644556  | Rsrc2         | -1.03384448 |
| Gm41518       | 0.9643922  | Prkaa1        | -1.03375768 |
| Sspo          | 0.96381474 | Riok1         | -1.0331674  |
| D930015E06Rik | 0.96333694 | Cflar         | -1.0324392  |
| Paqr6         | 0.9626188  | LOC102631979  | -1.03135872 |
| 6030468B19Rik | 0.96246814 | Eda           | -1.0313068  |
| Tbata         | 0.9620166  | Esyt2         | -1.0312424  |
| Palld         | 0.96150636 | Thrap3        | -1.03119468 |
| Cyb561a3      | 0.9612818  | Trim56        | -1.0311122  |
| Shprh         | 0.96114636 | Chst2         | -1.03000405 |
| Snrnp40       | 0.9611254  | Tpi1          | -1.02992585 |
| Hrh4          | 0.96102    | Zc3h7a        | -1.02972245 |
| Zfr2          | 0.960958   | Camsap1       | -1.028502   |
| Bbs5          | 0.9606466  | D830050J10Rik | -1.02776    |
| Dusp23        | 0.9602332  | 2310058N22Rik | -1.0276716  |
| Acvr2a        | 0.9593754  | Invs          | -1.02746772 |
| Ighmbp2       | 0.9588418  | Brd1          | -1.02737188 |
| Eya1          | 0.958539   | Glul          | -1.02735328 |
| Polr1a        | 0.9583044  | Wdr75         | -1.0269699  |
| Kcnq4         | 0.9579582  | Zbtb14        | -1.026649   |
| Tgfbr3l       | 0.95710039 | Klc1          | -1.0266452  |

|               |            |               |                  |
|---------------|------------|---------------|------------------|
| Prf1          | 0.95699548 | Ncapd2        | -1.02598072      |
| Nhlh1         | 0.95679236 | Hipk3         | -1.02592086      |
| Lrrc7         | 0.9567895  | Camk2n2       | -1.0244975       |
| Gm34464       | 0.95647096 | Ints4         | -1.024157        |
| Zmynd19       | 0.95639896 | Gpt           | -1.0240526       |
| Mtm1          | 0.95549726 | Hist2h2be     | -1.0236316       |
| Rad51c        | 0.95517254 | Ubfd1         | -1.02305174      |
| 4930432M17Rik | 0.95513916 | Fgd4          | -1.0226636       |
| Krtap5-5      | 0.95487452 | Fndc3a        | -1.022202        |
| Fgf3          | 0.954823   | Vti1a         | -1.0221529       |
| Gm32914       | 0.9546833  | Stard3nl      | -1.02215052      |
| Cwc22         | 0.95450974 | Smg1          | -1.02208472      |
| Nrg1          | 0.9541297  | 1600019K03Rik | -1.0219174       |
| Med8          | 0.9538412  | Cebpd         | -1.0219016       |
| Slc20a1       | 0.95361996 | Bsdc1         | -1.02144528      |
| Nfib          | 0.9535322  | Prpf39        | -1.02140332      |
| Add3          | 0.95336724 |               | 7-Mar -1.0211492 |
| Rnf224        | 0.9527974  | Exoc2         | -1.0209866       |
| Lgi3          | 0.9526768  | Pigv          | -1.0200374       |
| Itpkb         | 0.95104932 | Insig2        | -1.0199924       |
| Tnnt1         | 0.95056056 | Fnip1         | -1.0198865       |
| Pop7          | 0.9504566  | Ccdc97        | -1.01972246      |
| 1700063D05Rik | 0.9498682  | 4930402H24Rik | -1.0193782       |
| Gramd2        | 0.9493885  | Nfya          | -1.01928092      |
| Mettl3        | 0.94907712 | Cxcl1         | -1.0184646       |
| Gm35059       | 0.9485402  | Tcf12         | -1.0182266       |
| Slc43a3       | 0.9479766  | Ostm1         | -1.01813412      |
| Sema4a        | 0.94777536 | Bivm          | -1.0179          |
| Commd4        | 0.94775868 | Gm3227        | -1.01781488      |
| Mpped1        | 0.94622088 | Zranb1        | -1.0175738       |
| Boc           | 0.9462123  | Zbtb2         | -1.0170703       |
| Phka2         | 0.94580246 | Btbd11        | -1.0170088       |
| Timm50        | 0.94577026 | Map4k3        | -1.0169358       |
| Maoa          | 0.9455223  | Fam134b       | -1.01675748      |
| LOC102637854  | 0.94528246 | Fam193b       | -1.0164194       |
| Cep63         | 0.94505548 | Fbxo28        | -1.0162904       |
| Lif           | 0.9449954  | Klhl7         | -1.0162301       |
| Foxh1         | 0.94361066 | Ptp4a1        | -1.0161386       |
| Mcur1         | 0.94334746 | Arl4d         | -1.0159674       |

|               |            |               |             |
|---------------|------------|---------------|-------------|
| Gm17801       | 0.94291448 | Btg1          | -1.0159226  |
| Nfu1          | 0.94257116 | Ces1e         | -1.0157094  |
| Gm4354        | 0.94256544 | Morf4l2       | -1.0155806  |
| Gm11033       | 0.9424467  | Cog3          | -1.0154958  |
| 4733401D01Rik | 0.94227028 | 5430440L12Rik | -1.0153546  |
| Zfp385a       | 0.94188356 | Csnk2a2       | -1.015049   |
| Ccdc167       | 0.94187426 | Ipo5          | -1.014914   |
| Acaca         | 0.94175004 | Senp6         | -1.0147214  |
| Adgrb1        | 0.94167328 | 2810013P06Rik | -1.014636   |
| C7            | 0.94123554 | Tmx4          | -1.0145502  |
| Ccdc93        | 0.94107628 | Mbip          | -1.0144014  |
| 9930104L06Rik | 0.9406166  | H2-Ab1        | -1.01411152 |
| Tubb2a-ps2    | 0.93990516 | Tmc3          | -1.0141077  |
| Duoxa1        | 0.93978548 | Dusp26        | -1.01392412 |
| Abhd14a       | 0.93932008 | Nsun6         | -1.0134282  |
| Wnk3          | 0.93929196 | Frmd4b        | -1.0133424  |
| Ppp1r21       | 0.93917466 | Nsd1          | -1.0132804  |
| Aldh8a1       | 0.93904686 | Pcnx          | -1.0126328  |
| Fhad1os1      | 0.93894768 | Map2k4        | -1.01251412 |
| 1600014C10Rik | 0.93845368 | Appbp2        | -1.0122208  |
| Peli3         | 0.93776226 | Arel1         | -1.012136   |
| Ttc17         | 0.9377384  | Ptger3        | -1.0118198  |
| Xylt2         | 0.93757724 | Cyp4v3        | -1.01136232 |
| LOC552877     | 0.9365902  | Ell2          | -1.0107598  |
| Psmc3         | 0.93622542 | Brd8          | -1.01047612 |
| Atp8a1        | 0.93610906 | Zfp629        | -1.0100074  |
| Arhgef33      | 0.93520116 | Nhlrc3        | -1.0099816  |
| LOC102635358  | 0.93445014 | Igf1r         | -1.0096116  |
| Fam212a       | 0.93398904 | Sin3a         | -1.0092912  |
| D14Ertd670e   | 0.93291616 | Mier1         | -1.0090756  |
| Lrrc49        | 0.9327488  | Rnf111        | -1.008996   |
| Gins2         | 0.9325528  | Slc30a1       | -1.00887108 |
| Insrr         | 0.9321146  | Fgfr1         | -1.00833512 |
| Fgf11         | 0.93078804 | Suv420h1      | -1.0080666  |
| Rrp8          | 0.93061304 | Eif5b         | -1.0079656  |
| Penk          | 0.9301586  | Eva1c         | -1.0066914  |
| Rhox4e        | 0.93013764 | Zscan26       | -1.0066719  |
| Fastkd5       | 0.9299221  | Pigm          | -1.0058894  |
| Akap1         | 0.92984008 | Slc35e2       | -1.00551986 |

|               |            |               |             |
|---------------|------------|---------------|-------------|
| Adig          | 0.92965126 | Ptcd1         | -1.005507   |
| Unc13d        | 0.9294262  | Ptp4a1        | -1.0052428  |
| Lman2l        | 0.92937946 | Ankrd50       | -1.0050674  |
| B230312C02Rik | 0.92912674 | Tmc7          | -1.00501252 |
| Gm11482       | 0.92862416 | Cbx7          | -1.0045562  |
| Gm33115       | 0.92838954 | Bglap2        | -1.0044527  |
| C2cd2l        | 0.92815352 | Ccdc84        | -1.0043931  |
| Olfr1392      | 0.9280405  | Reep3         | -1.0041566  |
| 4833419G08Rik | 0.9276452  | Evi5          | -1.0038676  |
| Gm13999       | 0.92703724 | Rab2b         | -1.0037365  |
| BC021767      | 0.92685174 | Sobp          | -1.0036116  |
| Col13a1       | 0.926548   | Gcnt1         | -1.0026212  |
| Cnksr2        | 0.92595386 | D16Ertd472e   | -1.0016208  |
| Xpo5          | 0.92564774 | Gmcl1         | -1.0012092  |
| Zbtb45        | 0.92556906 | Pgam1         | -1.00110866 |
| Raly1         | 0.9252262  | Preli2        | -1.0006986  |
| Gm29949       | 0.92510176 | Vps72         | -1.00061988 |
| Olfr805       | 0.9250288  | Dhx36         | -1.0006051  |
| Acss3         | 0.9246111  | LOC102641377  | -1.0003152  |
| Ppp2r5a       | 0.92438173 | Snhg18        | -1.00007772 |
| Ggt5          | 0.92413474 | Fnbp1l        | -1.0000701  |
| Mapk8ip2      | 0.92406892 | Adora1        | -0.9995642  |
| Me1           | 0.92403936 | Gga2          | -0.9994488  |
| Ssbp2         | 0.9239049  | Dapk1         | -0.99935914 |
| C230037L18Rik | 0.92344474 | Gm9798        | -0.99932026 |
| Kcnma1        | 0.92309643 | 2210016L21Rik | -0.9992876  |
| Hdc           | 0.92293454 | Klf11         | -0.9991956  |
| Dnah8         | 0.92264652 | Nfatc2ip      | -0.99888324 |
| Rnu1b6        | 0.92226744 | Lrch3         | -0.9983392  |
| Fibp          | 0.92215728 | Pp2d1         | -0.9982152  |
| Ptch2         | 0.9220886  | Kcnk5         | -0.99712944 |
| Tcf4          | 0.92208766 | Ccnl2         | -0.997107   |
| Tob2          | 0.92174148 | Lemd3         | -0.996634   |
| Nkain1        | 0.9216666  | Lpin1         | -0.99650645 |
| Ppp1r27       | 0.92126036 | Tab3          | -0.99648428 |
| Epb4.1l2      | 0.92109728 | Ric1          | -0.9961996  |
| 4930523C07Rik | 0.9210334  | Plin5         | -0.99575996 |
| 4930402H24Rik | 0.92079496 | Smad5         | -0.99546432 |
| A230056J06Rik | 0.9199538  | Btc           | -0.99535656 |

|               |            |           |             |
|---------------|------------|-----------|-------------|
| Tyr           | 0.9193816  | Cckbr     | -0.9948468  |
| A630001G21Rik | 0.919363   | Peak1     | -0.9945836  |
| Usp46         | 0.9185977  | Rhbdf2    | -0.99449586 |
| Uqcc3         | 0.91825724 | Whsc1l1   | -0.9942398  |
| Pusl1         | 0.9178872  | Map4k3    | -0.9942126  |
| Gm6567        | 0.91750526 | Tmpo      | -0.9941063  |
| Yap1          | 0.91743612 | Cpeb2     | -0.99393892 |
| Slc22a8       | 0.91719914 | Hmox1     | -0.99384928 |
| Phykpl        | 0.91685724 | Usp32     | -0.99362994 |
| Smyd5         | 0.91667366 | Ndrp1     | -0.99257517 |
| Dlst          | 0.91658664 | Lppr5     | -0.9925306  |
| Klb           | 0.9165616  | Hps5      | -0.99226    |
| Gm5486        | 0.91651655 | Fam117b   | -0.99183654 |
| Gm32507       | 0.91622902 | Sf3b1     | -0.9907026  |
| Sdk1          | 0.9162178  | Pfcp      | -0.9902134  |
| E4f1          | 0.91553354 | Pat1      | -0.98961306 |
| Amdhd1        | 0.91526412 | Dock7     | -0.98945236 |
| D330041H03Rik | 0.9148531  | Siah2     | -0.98922824 |
| Pde1b         | 0.91465664 | Ubtd2     | -0.988873   |
| Plcx3         | 0.91433764 | Cdh11     | -0.98883724 |
| Fam210b       | 0.9142914  | Nr2c2     | -0.98872232 |
| Ccdc159       | 0.91423392 | Haus3     | -0.98855734 |
| Cdc23         | 0.91371012 | Cdc42bpb  | -0.988461   |
| 1810043G02Rik | 0.9131322  | Gm17066   | -0.9883809  |
| 4933433F19Rik | 0.91253376 | Tbc1d9b   | -0.9881847  |
| Lipo4         | 0.91228486 | Snx18     | -0.98817803 |
| Mir99ahg      | 0.9119568  | Cacnb1    | -0.9879551  |
| Itgb5         | 0.91159916 | Pfdn4     | -0.98754048 |
| P3h1          | 0.91139508 | Tspan7    | -0.98710156 |
| Chad          | 0.9111762  | Stau2     | -0.98674774 |
| Donson        | 0.9109788  | Rorc      | -0.98649884 |
| Fcer1g        | 0.9109652  | Leprt     | -0.98639726 |
| Depdc5        | 0.910552   | Nap1l1    | -0.98621606 |
| 0610011F06Rik | 0.9105406  | Med15     | -0.9858613  |
| 6430550D23Rik | 0.91027832 | Nr1d2     | -0.98512316 |
| Ocel1         | 0.910275   | Pbrm1     | -0.9840336  |
| Gm9789        | 0.91005992 | Zc3h4     | -0.9833102  |
| Hrh3          | 0.90993166 | Fpr2      | -0.9832282  |
| Myt1          | 0.90990496 | Serpina10 | -0.98293496 |

|               |            |               |             |
|---------------|------------|---------------|-------------|
| Phf11d        | 0.90969992 | Rsrp1         | -0.9828696  |
| Hes5          | 0.9092088  | Lrrc14        | -0.9826231  |
| Eif4e1b       | 0.90916586 | Raet1b        | -0.98250436 |
| Slc15a4       | 0.9086852  | Hdgfrp2       | -0.9824872  |
| Olfr1251      | 0.90866994 | Rb1cc1        | -0.98162915 |
| BC048559      | 0.9084306  | 6330575P09Rik | -0.9813752  |
| Stat2         | 0.908319   | Oard1         | -0.980988   |
| 1700093J21Rik | 0.90823746 | Ulk1          | -0.98019934 |
| Amt           | 0.908216   | Mrgbp         | -0.980021   |
| Syne1         | 0.9078536  | Whsc1l1       | -0.9796567  |
| Fam83a        | 0.90766    | Cdv3          | -0.9795518  |
| Nacc1         | 0.907074   | Polk          | -0.9792509  |
| Gpat2         | 0.90703248 | Cttncpy2nl    | -0.97897602 |
| Slc25a11      | 0.90699196 | Srgap2        | -0.9785881  |
| Gm6729        | 0.90685654 | Hnrnph3       | -0.9785476  |
| Atat1         | 0.9058194  | Atp2b1        | -0.97847604 |
| Fam168a       | 0.90526676 | Evi5          | -0.9780655  |
| Odf2          | 0.9050536  | Fam110c       | -0.97772456 |
| Gm7644        | 0.90495444 | Pum2          | -0.97749376 |
| Clcn6         | 0.9046602  | Gfm2          | -0.9773588  |
| Nqo1          | 0.90464736 | Fam63b        | -0.97731828 |
| D130046C19Rik | 0.9043536  | Lym2          | -0.97610808 |
| Epb4.1l5      | 0.9042802  | Strm          | -0.9759097  |
| Obp1a         | 0.9036851  | Tpgs2         | -0.97564364 |
| Sebox         | 0.90366268 | Rp2h          | -0.97524976 |
| Notch3        | 0.90348434 | Sdc1          | -0.97479392 |
| Gm38569       | 0.90318394 | Hist1h2bb     | -0.9747782  |
| Cops8         | 0.90294694 | Mcl1          | -0.9743228  |
| 8-Sep         | 0.90253926 | Dclre1a       | -0.97413254 |
| Wdr44         | 0.9024129  | Trmu          | -0.97396708 |
| 4930554G24Rik | 0.9019942  | Myo18a        | -0.97392823 |
| Sat2          | 0.9018388  | Zbtb11        | -0.97386074 |
| Rac3          | 0.9017534  | Gdpc1         | -0.9738164  |
| Kif23         | 0.90133094 | Mllt3         | -0.97378444 |
| Pacsin1       | 0.90130568 | Xpa           | -0.97376394 |
| Bola3         | 0.90070056 | Arhgap26      | -0.97260666 |
| Ypel4         | 0.89976454 | Mcl1          | -0.97250128 |
| Pqlc3         | 0.89931894 | Nipal3        | -0.97218084 |
| Tns4          | 0.898952   | Tbce          | -0.9717102  |

|               |            |          |             |
|---------------|------------|----------|-------------|
| Meis2         | 0.8985777  | Pgam1    | -0.97155523 |
| Fam196a       | 0.89845992 | Ypel5    | -0.97146272 |
| Anapc1        | 0.897769   | Xaf1     | -0.9711237  |
| Ostc          | 0.89743328 | Kif13a   | -0.971107   |
| Nwd1          | 0.89732456 | Nt5c3    | -0.97107792 |
| Zbtb26        | 0.8972783  | Btg3     | -0.97106886 |
| Cutal         | 0.8968406  | Birc3    | -0.97074174 |
| Olfr195       | 0.8963952  | Srsf1    | -0.97057008 |
| Hrc           | 0.8963356  | Rae1     | -0.9700408  |
| Rgs19         | 0.89584732 | Rpe      | -0.96935034 |
| Nubp1         | 0.89576768 | Ctdp1    | -0.9693141  |
| Mpzl2         | 0.89546586 | Xylb     | -0.9691944  |
| Cnn2          | 0.89496804 | Gm20867  | -0.96876336 |
| Mpped1        | 0.89469146 | Tbc1d9   | -0.96836328 |
| G630018N14Rik | 0.89453888 | Rora     | -0.96834326 |
| Rac2          | 0.8938432  | Pspc1    | -0.96800328 |
| Psmc3         | 0.89364576 | Fbxo11   | -0.96786594 |
| Gm15050       | 0.89342952 | Spata5l1 | -0.9678545  |
| Utf1          | 0.89340592 | Rnf146   | -0.96777796 |
| Gm10471       | 0.8930936  | Nudt22   | -0.9673376  |
| Hoxb3         | 0.8929362  | Orc3     | -0.96700812 |
| Pax1          | 0.8928566  | Elmsan1  | -0.9658165  |
| Gm15800       | 0.89267396 | Parp12   | -0.96577454 |
| Platr27       | 0.8924861  | Fpgs     | -0.96506024 |
| Suv420h2      | 0.89166212 | Wnk1     | -0.9649334  |
| Krt17         | 0.89162636 | Tab2     | -0.9648652  |
| Gm26911       | 0.89158558 | Pibf1    | -0.9648638  |
| Myo1e         | 0.8915615  | Sdc1     | -0.9646101  |
| Gm28505       | 0.8910575  | Itsn1    | -0.96456146 |
| AU021092      | 0.89086294 | Tnfsf9   | -0.96402788 |
| Acy1          | 0.89077616 | Rpain    | -0.96392012 |
| Bysl          | 0.89067984 | Cnot6l   | -0.96374608 |
| Gpr156        | 0.89028882 | Jund     | -0.96347856 |
| Spata31d1b    | 0.89005994 | Blzf1    | -0.9634476  |
| Prss33        | 0.88962554 | Tctn2    | -0.96323156 |
| Nfic          | 0.88959646 | Fibp     | -0.9629221  |
| Smim10l2a     | 0.88957406 | Dyrk2    | -0.96213054 |
| LOC105244659  | 0.8893676  | Gm21975  | -0.96203088 |
| Slc4a9        | 0.88911008 | Cenpo    | -0.96193552 |

|               |            |               |             |
|---------------|------------|---------------|-------------|
| Gm11545       | 0.88904048 | Rabgap1       | -0.96181584 |
| Gm31233       | 0.8886924  | Eif4a2        | -0.9617858  |
| Slc9a5        | 0.88857126 | Olfr97        | -0.96169568 |
| Mdga1         | 0.88856554 | Snrnp70       | -0.96146966 |
| Gm3764        | 0.8882022  | Smim1         | -0.9614606  |
| Cnih2         | 0.8880396  | Tlk1          | -0.96130228 |
| Tbcd          | 0.88800048 | Hmgb3         | -0.96072817 |
| Lims2         | 0.88791276 | Dnajib6       | -0.96059608 |
| Cgnl1         | 0.88771916 | Mgll          | -0.96041966 |
| Osbpl7        | 0.88748264 | Arhgef26      | -0.9595437  |
| Pvrl3         | 0.8874197  | Mtbp          | -0.95898772 |
| 1700054O19Rik | 0.8873682  | Hlcs          | -0.95877886 |
| Bri3bp        | 0.88705588 | Zfp639        | -0.95852804 |
| Tldc2         | 0.88681174 | Dvl2          | -0.9584446  |
| Usp19         | 0.88672304 | Dcaf6         | -0.958302   |
| Muc3          | 0.88666964 | Smad4         | -0.95813894 |
| Krtap10-4     | 0.88647128 | Cdk13         | -0.95804072 |
| BC006965      | 0.8858459  | Kbtbd2        | -0.95732832 |
| Tctn1         | 0.8856225  | Rsrc2         | -0.9571786  |
| Bcs1l         | 0.88549852 | Dnm1l         | -0.9569316  |
| Col24a1       | 0.88495492 | Tnks          | -0.95686626 |
| Yars          | 0.88479186 | Irak3         | -0.95667696 |
| S100pbp       | 0.884326   | Kifap3        | -0.95603752 |
| Fan1          | 0.88423348 | Rnf145        | -0.95539094 |
| Fam161a       | 0.8840604  | Rpp14         | -0.95502614 |
| Olfr1410      | 0.88398694 | Dhx57         | -0.95485544 |
| Eif3c         | 0.8839736  | Rarg          | -0.95479154 |
| Cacna2d1      | 0.88390446 | Iqgap2        | -0.9530282  |
| Helz2         | 0.8828478  | Dnajc24       | -0.95290184 |
| 0610039H22Rik | 0.8822112  | Pde4d         | -0.95268368 |
| Tdgf1         | 0.8821254  | Pias1         | -0.95183372 |
| Orc2          | 0.8820715  | Ccng2         | -0.95097924 |
| Ermap         | 0.88203668 | Tfcp2l1       | -0.95095492 |
| Psme2b        | 0.88176394 | Nudcd1        | -0.95082616 |
| Tmprss9       | 0.8815887  | Herc4         | -0.9507036  |
| Pank4         | 0.8814306  | Efna1         | -0.95064116 |
| Kcnk3         | 0.88099    | 4930512B01Rik | -0.95053626 |
| Stx8          | 0.88095046 | Arvcf         | -0.9505348  |
| Chchd3        | 0.880877   | Sp1           | -0.9504614  |



|               |            |          |             |
|---------------|------------|----------|-------------|
| Dock6         | 0.88058614 | Appl2    | -0.9503951  |
| Bcar3         | 0.88040876 | Ccdc39   | -0.9503536  |
| 2810006K23Rik | 0.8803892  | Eppk1    | -0.9498048  |
| Gm15433       | 0.88015174 | Pkm      | -0.9495635  |
| Armc12        | 0.87999534 | Ankmy2   | -0.94942808 |
| Atp7b         | 0.87983656 | Acbd3    | -0.94819784 |
| Plaur         | 0.8797922  | Sp3      | -0.94719696 |
| B9d2          | 0.8785677  | Dgkd     | -0.94699336 |
| C130033p17rik | 0.87840604 | Plod3    | -0.9469719  |
| Mbnl3         | 0.87768508 | Ash2l    | -0.9469094  |
| Sp6           | 0.87760496 | Zfp276   | -0.94673634 |
| Dock4         | 0.8774028  | Gm5635   | -0.94667196 |
| Itga5         | 0.8773985  | Snx13    | -0.9466114  |
| Klhdc7b       | 0.87715388 | Gm28818  | -0.94661    |
| Proz          | 0.8767829  | Wdfy1    | -0.94635964 |
| Col12a1       | 0.87674428 | Ppip5k1  | -0.94603872 |
| Rin2          | 0.87659264 | Cklf     | -0.9455776  |
| Gzmm          | 0.8764596  | Upp1     | -0.9452028  |
| 2810408A11Rik | 0.8764553  | Csnk1g1  | -0.9451318  |
| Caskin1       | 0.8763132  | Stx17    | -0.94498586 |
| Olfr329-ps    | 0.87626124 | Rnf135   | -0.94498252 |
| Gm30482       | 0.87619352 | Nfyb     | -0.94410514 |
| Tmem97        | 0.87599612 | BB114814 | -0.94347906 |
| Cachd1        | 0.87596036 | Gltscr1l | -0.94292784 |
| 4930488L21Rik | 0.87558032 | Myo5a    | -0.942852   |
| Stbd1         | 0.87540246 | Scrn3    | -0.9428148  |
| D230034L24Rik | 0.8753426  | Olfr24   | -0.94273544 |
| Zfp710        | 0.87528944 | Ccdc176  | -0.94239712 |
| Smyd3         | 0.87459088 | Poglut1  | -0.9412675  |
| Ptges3l       | 0.873827   | Pomk     | -0.94126272 |
| Usp17lc       | 0.87354946 | Tmcc3    | -0.94117593 |
| Hs3st1        | 0.87346364 | Atf7     | -0.9407468  |
| Pycr1         | 0.87344312 | Pisd-ps1 | -0.94005824 |
| Rabggta       | 0.8733406  | Dmxl2    | -0.93979644 |
| Tmem208       | 0.87334012 | Map1lc3a | -0.93978644 |
| Pdx1          | 0.87319708 | Nasp     | -0.93962    |
| Olfr1394      | 0.87279272 | Pik3ca   | -0.9395976  |
| Ap1s3         | 0.87277126 | Cul4a    | -0.93957948 |
| Rfpl4         | 0.87271166 | Ccnt2    | -0.93909454 |

|               |            |               |             |
|---------------|------------|---------------|-------------|
| Mical2        | 0.87241172 | Cobll1        | -0.93907308 |
| Tox3          | 0.87175894 | Pfkl          | -0.93850852 |
| E030030I06Rik | 0.87170648 | Pgm1          | -0.9381237  |
| Dguok         | 0.87153388 | Abhd4         | -0.9379592  |
| Ly6a          | 0.87134028 | Ipo8          | -0.93791794 |
| Tmem141       | 0.87124014 | Kdm7a         | -0.93748188 |
| Slc8b1        | 0.87110854 | Ptpn2         | -0.9374795  |
| Trim52        | 0.87067556 | Rasgef1b      | -0.9374018  |
| Apbb3         | 0.87056494 | Btg3          | -0.9372058  |
| Top3a         | 0.8703165  | Tifa          | -0.9367604  |
| Bcl9l         | 0.86998892 | Cln8          | -0.936749   |
| Sqle          | 0.86969614 | Specc1l       | -0.93659592 |
| Atm           | 0.8695698  | Cln2          | -0.93606376 |
| Rassf4        | 0.8692136  | Slc38a4       | -0.93585634 |
| Erh           | 0.8686595  | Las1l         | -0.93567132 |
| Slc6a6        | 0.86861848 | Ric1          | -0.93555974 |
| Nlr1          | 0.86857366 | Evi5          | -0.9353914  |
| Ostm1         | 0.868443   | Abhd16a       | -0.93517828 |
| 4933434E20Rik | 0.8684311  | Mms19         | -0.93508148 |
| Mamld1        | 0.86822128 | Alg1          | -0.93455886 |
| Mipol1        | 0.86806368 | Gdf15         | -0.93449164 |
| Ttc39b        | 0.867991   | Phf3          | -0.9343319  |
| Slc30a5       | 0.86769008 | Gpcpd1        | -0.9341464  |
| 4930533B01Rik | 0.8675132  | Rbm33         | -0.93405294 |
| Cass4         | 0.8670058  | Zcchc7        | -0.9339757  |
| Gm4956        | 0.8669362  | Grhpr         | -0.93397092 |
| Bbs9          | 0.86674143 | Ddb2          | -0.93362808 |
| Pdf           | 0.8666811  | Fam118a       | -0.93360376 |
| Nfya          | 0.86658144 | BC005624      | -0.93326854 |
| Tango2        | 0.8663368  | Akap12        | -0.9332404  |
| 1110017D15Rik | 0.86558772 | Stk35         | -0.93306304 |
| Maged2        | 0.86543036 | Orc3          | -0.932529   |
| Gm3704        | 0.86504888 | Creld2        | -0.93239832 |
| Nav1          | 0.86459804 | Pus7          | -0.93230056 |
| Kank1         | 0.86437892 | Rev3l         | -0.93208646 |
| Gna15         | 0.86407614 | Tgs1          | -0.93179274 |
| Foxd3         | 0.86391736 | Phka2         | -0.9317236  |
| 8030411F24Rik | 0.86366224 | 5033417F24Rik | -0.93160772 |
| Slc22a17      | 0.8636112  | Fam178a       | -0.9312222  |

|               |            |               |             |
|---------------|------------|---------------|-------------|
| Cmss1         | 0.8633766  | Wrb           | -0.9311962  |
| Nosip         | 0.86306906 | Nedd9         | -0.93111848 |
| Vti1a         | 0.86296654 | Zbtb2         | -0.9310851  |
| Krtap10-10    | 0.8628888  | Apba1         | -0.9310484  |
| Tpk1          | 0.862216   | Plekha7       | -0.93073606 |
| Ephb1         | 0.86205196 | Zbtb49        | -0.9304831  |
| 2210013O21Rik | 0.8620248  | Ccnl1         | -0.93047332 |
| Gja5          | 0.86154128 | Gm42151       | -0.93036508 |
| Nova2         | 0.8612094  | Ubxn2a        | -0.93009376 |
| Hcfc1r1       | 0.8610959  | C030004G16Rik | -0.92884088 |
| Cgn           | 0.8603358  | Wdfy2         | -0.9285946  |
| Stap2         | 0.86018324 | Zranb1        | -0.92818356 |
| Acss2         | 0.8601458  | Plekha1       | -0.92744732 |
| Spink5        | 0.86011886 | Cyp4f13       | -0.92665052 |
| Saal1         | 0.859998   | Entpd7        | -0.92662812 |
| Senp1         | 0.85953856 | Dusp8         | -0.92658472 |
| 5730416F02Rik | 0.85893726 | Zfp493        | -0.92597532 |
| Zfyve1        | 0.8588128  | Dennd4c       | -0.92583466 |
| Hapln4        | 0.8587904  | Slc25a34      | -0.92568708 |
| Coq6          | 0.8587322  | Stk38         | -0.92557334 |
| Srp72         | 0.85850524 | D930016D06Rik | -0.92552472 |
| Pnlhc1        | 0.8584628  | Herpud1       | -0.92522668 |
| Sh2d6         | 0.8584299  | Kmt2c         | -0.92423772 |
| Nprl3         | 0.85831452 | Prrc2b        | -0.92422486 |
| Glud1         | 0.85817432 | Rpl12         | -0.92369748 |
| Tmsb10        | 0.8576026  | Nt5dc3        | -0.92366314 |
| Zfp593        | 0.85754132 | Iba57         | -0.92316436 |
| Gm33700       | 0.857388   | Phf8          | -0.9230547  |
| Taf2          | 0.85725164 | Trnt1         | -0.9230118  |
| Phkb          | 0.85723924 | Naa60         | -0.92272783 |
| Zfp64         | 0.85700608 | Marcks        | -0.92251826 |
| Proc          | 0.8568888  | Snpc4         | -0.92244196 |
| Olfr32        | 0.8567741  | Immp2l        | -0.92227626 |
| Snx29         | 0.8564954  | Dcun1d1       | -0.92221784 |
| Eif2d         | 0.85641908 | Arhgef28      | -0.922102   |
| Ogfod3        | 0.8562665  | Nktr          | -0.92182208 |
| Knop1         | 0.8561616  | Rab6b         | -0.9217572  |
| D430042O09Rik | 0.85605668 | Btg1          | -0.92146444 |
| Gm19733       | 0.85596896 | Cnot10        | -0.9214325  |

|               |            |              |             |
|---------------|------------|--------------|-------------|
| Trmt10b       | 0.85569144 | Mup3         | -0.92141532 |
| Lst1          | 0.8554368  | Psd3         | -0.92114114 |
| Gm6209        | 0.8553362  | Cnot7        | -0.92065286 |
| Tbx20         | 0.85525156 | Rbbp6        | -0.92017984 |
| Epn3          | 0.85503912 | Snx11        | -0.91989708 |
| Pdlim7        | 0.85502768 | Slk          | -0.91980076 |
| Acsf2         | 0.8549924  | Fam114a2     | -0.91969347 |
| Smim12        | 0.85487556 | Paip2b       | -0.91958856 |
| Ywhab         | 0.8544698  | Casp6        | -0.91919374 |
| Zmiz1os1      | 0.85440254 | Utp20        | -0.91915036 |
| Lyrm1         | 0.85408592 | Sorbs1       | -0.91904784 |
| Gbp5          | 0.853868   | Ddr1         | -0.91873121 |
| Guca1b        | 0.85357047 | Golga1       | -0.91863204 |
| H2-T23        | 0.8534174  | Lias         | -0.91840792 |
| Map9          | 0.85288    | Thrap3       | -0.91828776 |
| Gm10325       | 0.85181046 | Orc4         | -0.91826772 |
| Wnt5b         | 0.85159684 | Kdm5b        | -0.91824008 |
| Gm14707       | 0.8515692  | Klf9         | -0.91814852 |
| Ndr3          | 0.851213   | Snora52      | -0.91806936 |
| Ak1           | 0.85120392 | Fbxl8        | -0.9179716  |
| Gm32645       | 0.85111761 | Cetn4        | -0.9174948  |
| C030006K11Rik | 0.85090112 | Kars         | -0.91720628 |
| Pou5f1        | 0.85088634 | Psme4        | -0.9164939  |
| 4930524C18Rik | 0.85069704 | Arap2        | -0.91643668 |
| Ptpn1         | 0.8505783  | D3Ertd254e   | -0.91615344 |
| Nlrc5         | 0.850472   | Shoc2        | -0.9161234  |
| Tuba1c        | 0.85026788 | Nek3         | -0.9160404  |
| 9530020I12Rik | 0.85005188 | Mat2b        | -0.91586066 |
| Ankfy1        | 0.84954548 | Peli1        | -0.9156766  |
| Igf1os        | 0.84945344 | Atg10        | -0.91552544 |
| 1700061J23Rik | 0.84941626 | Crcp         | -0.91510248 |
| Lgi4          | 0.8484397  | Zfp455       | -0.9148698  |
| Tnfsf12       | 0.84801006 | Atg4b        | -0.9145446  |
| Abcc3         | 0.8478222  | Rabepk       | -0.9144654  |
| Krt16         | 0.84766054 | Ugcg         | -0.91423559 |
| Six1          | 0.84708548 | Mark3        | -0.91414928 |
| Aqp4          | 0.847023   | LOC100862466 | -0.91392374 |
| Hspa12b       | 0.84689092 | Ppp1r12a     | -0.91379308 |
| Myoz3         | 0.84670496 | Rdh11        | -0.913352   |

|               |            |               |             |
|---------------|------------|---------------|-------------|
| Gm2102        | 0.84655284 | Pxmp4         | -0.91261148 |
| Ttc4          | 0.84607076 | Tmem216       | -0.91253566 |
| 4932443L11Rik | 0.84603786 | 5830469G19Rik | -0.9123702  |
| Nrsn2         | 0.84586048 | Prmt6         | -0.9122844  |
| Gjc3          | 0.84575128 | Ccnt2         | -0.9120488  |
| Arhgap17      | 0.84534692 | Cflar         | -0.9119687  |
| Ciapin1       | 0.8453269  | 1700084J12Rik | -0.91181326 |
| Elfn1         | 0.8449578  | Ints10        | -0.9117794  |
| A730017C20Rik | 0.8446188  | Uhrf2         | -0.91161584 |
| Olf45         | 0.84440374 | Zmym2         | -0.91121436 |
| Micall1       | 0.84374714 | Abhd2         | -0.91118956 |
| Klk4          | 0.8435712  | D030028A08Rik | -0.91082192 |
| F830016B08Rik | 0.84322787 | Gna14         | -0.91039134 |
| Olf49         | 0.84303808 | Arid4b        | -0.9103842  |
| Coq5          | 0.84296608 | Sp1           | -0.91016626 |
| Gm6557        | 0.8429513  | Map1b         | -0.910069   |
| G6pdx         | 0.8426509  | Arglu1        | -0.90974904 |
| AA617406      | 0.84238244 | Ccpg1         | -0.909616   |
| Elac2         | 0.8419008  | Enah          | -0.90914392 |
| Trim2         | 0.8417101  | Gm15939       | -0.90896344 |
| Ncf1          | 0.8415513  | Il6ra         | -0.90887928 |
| 1700025L06Rik | 0.84144974 | Gm10792       | -0.90856696 |
| Hgsnat        | 0.84144448 | F8a           | -0.9078822  |
| Lim2          | 0.84108282 | Plk4          | -0.90754032 |
| Msmo1         | 0.84083796 | Apbb2         | -0.90742732 |
| Pcdhga9       | 0.84081126 | Atf2          | -0.9071331  |
| Cyp4f18       | 0.8406682  | Ldlrad4       | -0.90709185 |
| Tecr          | 0.84059572 | Seh1l         | -0.907042   |
| St3gal1       | 0.84043264 | Mbtd1         | -0.9068792  |
| Pih1d1        | 0.840178   | Pias3         | -0.90684796 |
| Txn2          | 0.83984304 | Aftph         | -0.90664244 |
| Fzd5          | 0.83974028 | Map4k4        | -0.90657234 |
| Acot13        | 0.8395786  | Arih2         | -0.90633726 |
| Rfx5          | 0.83949614 | Stag1         | -0.90612746 |
| Plscr1        | 0.8392148  | Hdhd2         | -0.90609026 |
| Mis18bp1      | 0.83919812 | Mgea5         | -0.90603446 |
| Mrpl12        | 0.8387408  | Ankrd50       | -0.90538884 |
| Ikzf3         | 0.8386631  | Rock1         | -0.9052992  |
| Cd37          | 0.8386078  | Gosr1         | -0.90527916 |

|               |            |          |             |
|---------------|------------|----------|-------------|
| 5730416F02Rik | 0.8385806  | Pard6g   | -0.90514184 |
| Nsmf          | 0.83827066 | Tmem199  | -0.90492868 |
| Pnkp          | 0.8381748  | Ankfy1   | -0.90480376 |
| Lce1j         | 0.83764792 | Fam60a   | -0.90478944 |
| Nagk          | 0.83750534 | Tmem181a | -0.90465974 |
| Mrpl48        | 0.83736468 | Ivd      | -0.90465068 |
| Mad2l1        | 0.83730912 | Dcun1d4  | -0.90458632 |
| Gm26881       | 0.83710146 | Msl2     | -0.90428686 |
| Slco4a1       | 0.83705234 | Chd9     | -0.90388536 |
| Hoxa11os      | 0.83689976 | Senp6    | -0.9027262  |
| 2700038G22Rik | 0.8366282  | Hook1    | -0.90250254 |
| Tbc1d23       | 0.83662724 | Tor1aip2 | -0.90233088 |
| Tmco3         | 0.8363724  | Plxnb1   | -0.90212774 |
| Mical1        | 0.83622694 | Nkx2-2   | -0.90187692 |
| Zcchc17       | 0.83595848 | Ube2g1   | -0.9016328  |
| 8430426J06Rik | 0.83592558 | Gm5907   | -0.901597   |
| Gm5591        | 0.83573484 | Dyrk2    | -0.90156364 |
| Cthrc1        | 0.83563996 | Hamp     | -0.90148354 |
| Sssca1        | 0.83530236 | Clock    | -0.90129614 |
| Cflar         | 0.83498716 | Gabra4   | -0.9012866  |
| 4933432I09Rik | 0.83488988 | Oxsr1    | -0.9010129  |
| Ang2          | 0.83451652 | Erbp3    | -0.90084886 |
| Lin28a        | 0.83448648 | Abhd17b  | -0.90053988 |
| Alkbh4        | 0.83397294 | Ggps1    | -0.89997196 |
| Rbpms         | 0.83347034 | Fbxo3    | -0.89992856 |
| Xdh           | 0.83300876 | Ints2    | -0.89980888 |
| Otor          | 0.832659   | Actr5    | -0.89971208 |
| Gm15850       | 0.83260298 | Abcd1    | -0.89924288 |
| 0610007P14Rik | 0.83243132 | Rsph3a   | -0.89921712 |
| Gon4l         | 0.83241034 | Syde1    | -0.8990779  |
| Gm11211       | 0.8323302  | Liph     | -0.89878464 |
| Psd4          | 0.8322754  | Fosb     | -0.8979144  |
| Gm3772        | 0.83224296 | Spc25    | -0.89784812 |
| Parva         | 0.83224106 | Ppp2r5c  | -0.8977008  |
| Tyw1          | 0.8319454  | Wdsub1   | -0.8976712  |
| Trip6         | 0.83183766 | Mex3d    | -0.89766216 |
| Pcdh15        | 0.83162594 | Hcfc2    | -0.8975439  |
| Prcp          | 0.83151436 | Srrm2    | -0.89747096 |
| Gm12216       | 0.83149672 | Bri3     | -0.8974235  |

|               |            |               |             |
|---------------|------------|---------------|-------------|
| Prap1         | 0.83145236 | Rnf146        | -0.8973918  |
| Tmem102       | 0.83141136 | Rela          | -0.89738321 |
| Kitl          | 0.83112764 | Zfp62         | -0.8971939  |
| Lhx3          | 0.83080244 | Gins4         | -0.89679384 |
| Rapsn         | 0.83077384 | Gtf2h2        | -0.89664506 |
| Nlrp5         | 0.83045674 | Rnf169        | -0.89616632 |
| Mkl1          | 0.83036136 | Ptdss2        | -0.89607716 |
| Zeb2          | 0.8302336  | Fmr1          | -0.89607144 |
| Gpr157        | 0.83022642 | Itfg2         | -0.89602756 |
| Zdhhc2        | 0.82940054 | Nr1h4         | -0.89592766 |
| Sh2d5         | 0.82932854 | Brca1         | -0.8958025  |
| LOC100049077  | 0.82902146 | Tgfbr2        | -0.8957181  |
| Gm34433       | 0.8288021  | Snn           | -0.89569616 |
| Bzw2          | 0.8287487  | Ppp2r2d       | -0.89560366 |
| Stim2         | 0.82857252 | Eogt          | -0.8954992  |
| Slc44a3       | 0.82844066 | Btbd1         | -0.8953638  |
| LOC105242553  | 0.82840728 | Oxr1          | -0.8952656  |
| Best1         | 0.8281951  | Mbtps1        | -0.89368248 |
| Gm35525       | 0.82810688 | Ddx59         | -0.89328432 |
| S100a3        | 0.82808732 | Spata5        | -0.8927002  |
| Aebp1         | 0.8277235  | Acad8         | -0.8924942  |
| Aste1         | 0.82761336 | Abl2          | -0.8924222  |
| 4921516I12Rik | 0.82727336 | Casp9         | -0.89230346 |
| Kat2a         | 0.8271327  | Cdr1          | -0.89221405 |
| Nudt3         | 0.8266878  | Abtb1         | -0.892035   |
| Gm34657       | 0.82656288 | Ptar1         | -0.89186692 |
| Zfhx2         | 0.8262043  | Ggnbp1        | -0.8915782  |
| Nms           | 0.82576466 | Smek1         | -0.89155054 |
| Tubb5         | 0.82558774 | Pnpt1         | -0.8912544  |
| Rab34         | 0.82546806 | A930004J17Rik | -0.89125156 |
| Robo1         | 0.82469224 | D030018L15Rik | -0.89076614 |
| Myg1          | 0.824636   | Tspyl1        | -0.8905282  |
| Chchd3        | 0.82443714 | Wdr82         | -0.8903222  |
| Selenbp2      | 0.82442713 | Rabgef1       | -0.89019966 |
| Tox2          | 0.82434607 | Map3k6        | -0.89003706 |
| 2310045N01Rik | 0.82421876 | Mon2          | -0.88984346 |
| Panx2         | 0.8240948  | Trpm7         | -0.88967228 |
| Faah          | 0.82397986 | Rap2b         | -0.8896141  |
| Clmp          | 0.82376384 | Rnf111        | -0.88947916 |

|               |            |               |             |
|---------------|------------|---------------|-------------|
| Gm7967        | 0.82324552 | Galnt6        | -0.8894     |
| Tmem41b       | 0.8232379  | Plekha5       | -0.88920546 |
| Spryd3        | 0.82317304 | Rbm39         | -0.88901568 |
| Ppp6r2        | 0.8230138  | Rps6kc1       | -0.8887782  |
| Sptlc3        | 0.82276248 | Rdx           | -0.88841534 |
| Rtp2          | 0.8227534  | Taf5          | -0.88815164 |
| Myo18b        | 0.82272196 | Pxk           | -0.8879938  |
| Cd248         | 0.82258796 | Rcor3         | -0.88779068 |
| Pbld1         | 0.82222366 | Spaca6        | -0.8877468  |
| Naa25         | 0.8222194  | E330017A01Rik | -0.88734936 |
| Gm10436       | 0.82217788 | Rbm39         | -0.8860917  |
| Gm30455       | 0.8214288  | Eppk1         | -0.8858695  |
| Gm39463       | 0.8213992  | Ddx28         | -0.8857608  |
| Appbp2os      | 0.82093334 | Fcho2         | -0.88542414 |
| Slx1b         | 0.82092046 | Arhgap29      | -0.88534976 |
| Lgals1        | 0.82072687 | Socs6         | -0.885108   |
| Fuca2         | 0.8202138  | Zcchc7        | -0.88493968 |
| Acot7         | 0.8197274  | Mbd1          | -0.88488436 |
| Slc38a5       | 0.81970454 | Foxj2         | -0.88438844 |
| 1700084C01Rik | 0.8191204  | Ddx6          | -0.88434648 |
| Pcsk7         | 0.81908512 | Prkar2a       | -0.88397312 |
| Cldn18        | 0.8185091  | Usp12         | -0.8839407  |
| Mdfic         | 0.8183334  | Tmc7          | -0.88389348 |
| Hk3           | 0.8183179  | Taz           | -0.883698   |
| Ubxn8         | 0.81793594 | Micall1       | -0.8832097  |
| Enpp2         | 0.81784392 | Zfp655        | -0.88283444 |
| Slpi          | 0.81679868 | Zbtb39        | -0.88280868 |
| Patz1         | 0.8167944  | Gpcpd1        | -0.88227654 |
| Matn4         | 0.8160434  | Pcgf3         | -0.8819752  |
| Med27         | 0.8160286  | Lpin2         | -0.8818736  |
| Gm14762       | 0.81540156 | Acadl         | -0.88161516 |
| 1700066B19Rik | 0.8153987  | Cask          | -0.8813777  |
| Osbpl10       | 0.81529    | Fam63b        | -0.88125372 |
| Olf1242       | 0.81473828 | Brwd1         | -0.88108968 |
| Man2b2        | 0.81471252 | Il13ra1       | -0.88079644 |
| Fcho1         | 0.81443786 | Csrp2bp       | -0.88068246 |
| Gm35521       | 0.81421996 | Nbr1          | -0.87998676 |
| D030024E09Rik | 0.81392695 | Arrb2         | -0.87986994 |
| Dact3         | 0.81309914 | Hdgfrp2       | -0.8798623  |



|               |            |            |             |
|---------------|------------|------------|-------------|
| Gm5478        | 0.81304788 | Gmfb       | -0.8798456  |
| Auh           | 0.81263066 | Zfand6     | -0.8798146  |
| Hsd17b14      | 0.8122158  | Smurf2     | -0.8797717  |
| Foxd2os       | 0.8121412  | Klf9       | -0.8786874  |
| Sprr2j-ps     | 0.81197024 | Acp5       | -0.87851524 |
| Ttll8         | 0.81182645 | Wdr5       | -0.87837886 |
| Fcrl5         | 0.81176614 | Mctp2      | -0.87823152 |
| Def8          | 0.81151486 | Oxct1      | -0.87755156 |
| Oas1d         | 0.81123494 | Csgalnact2 | -0.87716628 |
| Mlycd         | 0.8111248  | Gm20324    | -0.87703848 |
| Cs            | 0.8107543  | Kdm3a      | -0.87695694 |
| Fam35a        | 0.81040596 | Abcf3      | -0.87675286 |
| 4930519F16Rik | 0.81031228 | Sec24b     | -0.8764162  |
| Bzw2          | 0.8098979  | Fbxo45     | -0.8762598  |
| Il20rb        | 0.80989694 | Ghr        | -0.8761754  |
| Pcdhga9       | 0.80975867 | Cdkal1     | -0.8753514  |
| Slc26a6       | 0.8097544  | Olfr948    | -0.87525416 |
| AA416453      | 0.80941344 | Wtap       | -0.87484288 |
| Jade2         | 0.80930972 | Kbtbd4     | -0.87419986 |
| Trpm8         | 0.80926132 | Xpo4       | -0.87400532 |
| Tmem123       | 0.8090482  | Sh3d21     | -0.8739362  |
| Alkbh3        | 0.80875588 | Ralgapb    | -0.87367774 |
| Rrp1b         | 0.80872536 | Paip2b     | -0.87333106 |
| Usp36         | 0.80867576 | Ptpn3      | -0.87308406 |
| Olfr572       | 0.8086729  | Fam135a    | -0.8725686  |
| Cfhr2         | 0.8085232  | Rora       | -0.8722882  |
| Mcmdc2        | 0.80844068 | Zc3hav1    | -0.87208032 |
| Prr19         | 0.8083806  | Ptger3     | -0.87174844 |
| Arhgap27      | 0.8081784  | Asah1      | -0.8716793  |
| Ropn1l        | 0.80786348 | Ccdc9      | -0.87165594 |
| 2610021A01Rik | 0.80765914 | Anapc10    | -0.87124776 |
| Sva           | 0.8076396  | Lrrc57     | -0.870944   |
| Camp          | 0.80763864 | Zfp454     | -0.8706064  |
| Fntb          | 0.80755044 | Lrrc8c     | -0.87054848 |
| 1700028J19Rik | 0.8074026  | Shroom3    | -0.87009906 |
| Il17rd        | 0.80700016 | Plekhh1    | -0.8697672  |
| Olfr187       | 0.80696727 | Trappc6b   | -0.86976576 |
| Bok           | 0.80684186 | Lrrc8e     | -0.86967326 |
| Naa25         | 0.8067429  | Ppp1r10    | -0.86923934 |

|               |            |               |             |
|---------------|------------|---------------|-------------|
| Klhl1         | 0.80659676 | Fus           | -0.86921548 |
| Gm13580       | 0.8065882  | 5930403L14Rik | -0.8691821  |
| 2210018M11Rik | 0.8065796  | Mbtd1         | -0.868978   |
| Ap5b1         | 0.80617856 | Eftud1        | -0.8687382  |
| Gm32762       | 0.80616236 | Neu3          | -0.86863614 |
| 4930560O18Rik | 0.80604648 | Nup155        | -0.8682132  |
| Lig1          | 0.80573988 | Clcn3         | -0.868093   |
| Klhl33        | 0.8053031  | Gpx2-ps1      | -0.86794996 |
| Peg3os        | 0.8051138  | Ankrd42       | -0.86790395 |
| Gm12977       | 0.8045783  | Efna3         | -0.867347   |
| AI854703      | 0.8044224  | Adar          | -0.86704064 |
| Pet117        | 0.80441188 | Sdcbp         | -0.86691808 |
| Pam16         | 0.80411864 | Prr15         | -0.86672116 |
| Pde1a         | 0.80381966 | Mapkapk3      | -0.866693   |
| Zfp934        | 0.80379724 | 2810427A07Rik | -0.8666208  |
| Snx17         | 0.80364274 | Erb2ip        | -0.8657279  |
| Terf2         | 0.80359412 | Atad2b        | -0.86545896 |
| Scube2        | 0.8033533  | Acss1         | -0.8649688  |
| Cnep1r1       | 0.80275107 | Large         | -0.86462306 |
| Muc5b         | 0.80273914 | Cxadr         | -0.86455012 |
| Asnsd1        | 0.80250788 | Gnat2         | -0.86396195 |
| Olf324        | 0.80241584 | Impad1        | -0.86387252 |
| Atp6v1g2      | 0.80209494 | Pds5a         | -0.86371804 |
| Rnf180        | 0.80200434 | Wdr74         | -0.86347866 |
| Pip4k2c       | 0.80193948 | Rab18         | -0.86342573 |
| Cspp1         | 0.8019247  | Spata7        | -0.863379   |
| Npas4         | 0.8016858  | Klf7          | -0.8633156  |
| Rhbdl2        | 0.80153466 | Kif1b         | -0.86298752 |
| Kat6b         | 0.80137396 | Ddi2          | -0.8626318  |
| Krtap21-1     | 0.80124808 | Glod4         | -0.86232566 |
| Nudt7         | 0.80119228 | Eya3          | -0.86225844 |
| Gid8          | 0.80101252 | Wbp1l         | -0.86217546 |
| Zfp277        | 0.8005934  | Ndor1         | -0.8619456  |
| H2-T9         | 0.8005681  | Gm17344       | -0.86173486 |
| Tuba1b        | 0.80036212 | Grhl1         | -0.86144304 |
| Wdr83os       | 0.8002901  | Gnpnat1       | -0.86113166 |
| Cnbp          | 0.8002081  | Whsc1         | -0.8599286  |
| Zfp939        | 0.8002038  | Tmem161a      | -0.8595562  |
| Wwc1          | 0.8000388  | AI415730      | -0.85863686 |

|               |            |               |             |
|---------------|------------|---------------|-------------|
| Gm36877       | 0.79983044 | Rab28         | -0.85771226 |
| Cpe           | 0.79977942 | Paip2b        | -0.85734416 |
| Fanca         | 0.79970788 | Stmn1         | -0.85710764 |
| Kcnq1ot1      | 0.79936456 | Pnn           | -0.8563752  |
| Cd4           | 0.7991395  | Atf7          | -0.85627652 |
| E130308A19Rik | 0.79898692 | Depdc5        | -0.85626412 |
| Map6          | 0.7988615  | Gpatch11      | -0.85619592 |
| Tonsl         | 0.7986102  | Gm34368       | -0.8560853  |
| Fam166a       | 0.79843474 | Mical2        | -0.85602188 |
| Armt1         | 0.79842854 | Def6          | -0.855834   |
| Olfr56        | 0.79809    | Mob1b         | -0.85574008 |
| Slc20a1       | 0.7978568  | Traf3ip1      | -0.85535764 |
| Gm31169       | 0.79745508 | Cklf          | -0.85512066 |
| Csdc2         | 0.79728746 | Agps          | -0.85481214 |
| 3110035E14Rik | 0.7972231  | Vbp1          | -0.85481024 |
| Sertad3       | 0.79696226 | Enpp5         | -0.85464286 |
| Inpp5e        | 0.79683066 | Ncoa4         | -0.85449696 |
| Ajap1         | 0.79670334 | Vamp1         | -0.85432316 |
| Trav6-3       | 0.79659366 | Gtf2h2        | -0.85397624 |
| Fam222b       | 0.79656028 | Ccnt2         | -0.85373688 |
| BC049762      | 0.79654216 | Tiam2         | -0.85363984 |
| D7Ertd443e    | 0.7961712  | Gm20877       | -0.85359764 |
| Speer5-ps1    | 0.79616786 | Trf           | -0.85335874 |
| Aspa          | 0.79613208 | Atr           | -0.85321    |
| A930005H10Rik | 0.7958579  | Card10        | -0.8525276  |
| Cyb561a3      | 0.7957697  | Tex30         | -0.8525033  |
| Klhdc8a       | 0.79520034 | Slc4a7        | -0.8522334  |
| Vps39         | 0.79512834 | Pkdcc         | -0.85180426 |
| Ranbp3        | 0.79494428 | Gm19269       | -0.8516612  |
| Rhod          | 0.7944789  | Swt1          | -0.8513808  |
| Lcn2          | 0.79417562 | Nfil3         | -0.8512664  |
| Morn3         | 0.79383636 | Naa30         | -0.8511653  |
| Gm5797        | 0.79383088 | AW549877      | -0.85113    |
| Gstm5         | 0.79361296 | Tcerg1        | -0.851048   |
| Id3           | 0.79344272 | 9930021J03Rik | -0.8509908  |
| 1700064F23Rik | 0.79299832 | Elk4          | -0.85073472 |
| Akt1          | 0.79278994 | Cacfd1        | -0.85067988 |
| Gm33700       | 0.79269266 | 1600014C10Rik | -0.85048724 |
| Chmp6         | 0.79252148 | Plaa          | -0.84991168 |

|               |            |          |             |
|---------------|------------|----------|-------------|
| Rmdn1         | 0.79160786 | Ccdc34   | -0.84988356 |
| Epha7         | 0.79160548 | Tnks2    | -0.84986496 |
| Spns1         | 0.79157734 | Camsap1  | -0.849668   |
| Cbfa2t2       | 0.79136824 | Mccc1os  | -0.8493185  |
| Nme7          | 0.79133868 | Plekhm1  | -0.84927654 |
| Gm16677       | 0.79092264 | Dnajc21  | -0.8492694  |
| Efna2         | 0.79066896 | Ralgapb  | -0.84897994 |
| 1700027A15Rik | 0.7905705  | Krit1    | -0.8484268  |
| Ccni          | 0.79052306 | Smad3    | -0.84838628 |
| Hint2         | 0.7904725  | Olfr1155 | -0.84838271 |
| Tal1          | 0.79032588 | Hsd1l    | -0.84791756 |
| Arhgap1       | 0.79032088 | Ptprj    | -0.8478961  |
| Mybl2         | 0.79022216 | Gm12059  | -0.84770346 |
| Gm10536       | 0.78996134 | Mepce    | -0.84712934 |
| Caap1         | 0.78978968 | Mtdh     | -0.8469615  |
| 1810041L15Rik | 0.78961324 | Eif2ak4  | -0.84681272 |
| Adgrl2        | 0.78934144 | Usp24    | -0.8466134  |
| D430041D05Rik | 0.78918792 | Entpd1   | -0.8466096  |
| Pdc           | 0.78916932 | Dync1li1 | -0.8465662  |
| Muc20         | 0.7890978  | BC029214 | -0.8465204  |
| 1600010M07Rik | 0.78896046 | Zwint    | -0.846457   |
| Stc2          | 0.7887602  | Yars     | -0.8464241  |
| Cpne5         | 0.78867816 | AU040320 | -0.8463726  |
| 2310035C23Rik | 0.7885432  | Clk1     | -0.84635592 |
| A430010J10Rik | 0.78848172 | Bsdc1    | -0.8460393  |
| Ercc4         | 0.7884624  | Acbd6    | -0.8460002  |
| Esam          | 0.7882495  | Creb1    | -0.84586286 |
| Ppp1r12b      | 0.78796864 | Ccl11    | -0.84549    |
| Gm32664       | 0.78789448 | Zfp869   | -0.84541464 |
| Prkrir        | 0.7876396  | Atf7ip   | -0.84521246 |
| 3300002I08Rik | 0.78750706 | Mbd1     | -0.84509707 |
| Wrap53        | 0.7874532  | Meaf6    | -0.84458876 |
| Neurl1a       | 0.7872114  | Lbh      | -0.84418344 |
| Gm11149       | 0.7870848  | Sbno1    | -0.84395648 |
| Zfp646        | 0.78694678 | Fam208a  | -0.84390784 |
| Fxyd3         | 0.7866216  | Acp2     | -0.84383392 |
| Cldn2         | 0.78640986 | Nck2     | -0.8438058  |
| Mfap4         | 0.78639794 | Gcc1     | -0.84347772 |
| Lpl           | 0.7862992  | Tubgcp4  | -0.8434019  |

|               |            |             |             |
|---------------|------------|-------------|-------------|
| LOC328066     | 0.7862711  | Cd3e        | -0.84335566 |
| Adat1         | 0.78598928 | Ica1l       | -0.84297324 |
| Ndufaf7       | 0.7857504  | Ddx19b      | -0.8426318  |
| Gm12633       | 0.78566884 | Epc2        | -0.8425498  |
| Gcsh          | 0.7856412  | Srcin1      | -0.84192109 |
| Slfn9         | 0.78501272 | Itsn1       | -0.84173584 |
| Medag         | 0.78481795 | Alg11       | -0.84166194 |
| Sh2d6         | 0.7847917  | Smarca5-ps  | -0.841517   |
| Gm9706        | 0.7846904  | Bnip3l      | -0.84132528 |
| Enpp7         | 0.78402376 | Tank        | -0.84127284 |
| Isoc2b        | 0.78398324 | Ykt6        | -0.8404069  |
| Olf1443       | 0.78394174 | D10Bwg1070e | -0.8403511  |
| Tlr8          | 0.7837968  | Sirt1       | -0.84021616 |
| Map7d1        | 0.78376626 | Fam120c     | -0.84018136 |
| Mef2b         | 0.78346968 | Clic4       | -0.84012652 |
| P2rx1         | 0.78316736 | Sars        | -0.84010172 |
| Gm10427       | 0.78313064 | Ptp4a1      | -0.83999587 |
| Gmn           | 0.78313064 | Polr3d      | -0.83961772 |
| Prepl         | 0.78307796 | Dnajc19     | -0.83952952 |
| Rrp9          | 0.782969   | H2-Q7       | -0.83840418 |
| Sgms1         | 0.78268384 | Hist1h1d    | -0.83791828 |
| Zfp600        | 0.7826102  | Glce        | -0.83762216 |
| Tmbim4        | 0.7823782  | N6amt1      | -0.83721114 |
| Wbscr16       | 0.78235674 | Plac9a      | -0.83681632 |
| Cyp4f18       | 0.7823491  | Sord        | -0.83616256 |
| Olf1570       | 0.78223992 | Ubp1        | -0.83584594 |
| Gm10101       | 0.78209304 | Tceal6      | -0.83573436 |
| 4930543I03Rik | 0.78190636 | Gmeb2       | -0.8350024  |
| Snhg7os       | 0.78170872 | Ski         | -0.83497476 |
| Sh3d19        | 0.78158712 | Ttc33       | -0.8346591  |
| Vmn1r65       | 0.7813139  | Pyy         | -0.83454276 |
| A26c2         | 0.78129434 | Taf1d       | -0.83445596 |
| Mrps26        | 0.781198   | Tmem181a    | -0.83425    |
| B430010I23Rik | 0.78101348 | Mms19       | -0.83422136 |
| Net1          | 0.78060388 | Acvr1b      | -0.83391666 |
| Tuba1c        | 0.7805314  | Tmem42      | -0.8338504  |
| AU040972      | 0.78046846 | Fbxw17      | -0.8337412  |
| 1700019O17Rik | 0.7804408  | Lrba        | -0.83231306 |
| Ppdpf         | 0.7804074  | Itsn1       | -0.83230066 |

|               |            |          |             |
|---------------|------------|----------|-------------|
| Tmem206       | 0.7803564  | Rab40c   | -0.8322954  |
| Atp8b4        | 0.7803049  | Hiatl1   | -0.83220244 |
| Lrrc46        | 0.7801008  | Mkks     | -0.83209944 |
| Sh3kbp1       | 0.77972508 | Anp32a   | -0.83149387 |
| Ppp1r18       | 0.7797222  | Tmem116  | -0.83148288 |
| Osbpl10       | 0.77939414 | Etohd2   | -0.83141566 |
| Trim39        | 0.779263   | Dnah17   | -0.8314004  |
| Fen1          | 0.779212   | Fip1l1   | -0.83128404 |
| Phc1          | 0.7791276  | Gls      | -0.83112908 |
| Adam17        | 0.7790456  | Slc16a3  | -0.83093644 |
| Gm15624       | 0.7787094  | Foxo3    | -0.83077574 |
| Glb1          | 0.7784233  | Trio     | -0.8307142  |
| Gsg1          | 0.778409   | Dapp1    | -0.8304782  |
| Ddx31         | 0.7781434  | Fgfr1    | -0.8302145  |
| Olfir536      | 0.77788352 | Rest     | -0.82941532 |
| Fam178b       | 0.7776208  | Tdg      | -0.82937336 |
| H2-T3         | 0.77754856 | Thap7    | -0.82935954 |
| Hmg20a        | 0.777421   | Zw10     | -0.82933712 |
| Me1           | 0.77734136 | Zfyve1   | -0.82932376 |
| Fam78a        | 0.7771816  | Zhx2     | -0.82927704 |
| Selenbp1      | 0.77696372 | Aga      | -0.82915926 |
| Elavl3        | 0.7768724  | Arap2    | -0.8291502  |
| Gm35688       | 0.77674008 | Mfhas1   | -0.8289895  |
| Slc22a18      | 0.7767048  | Jmjd6    | -0.82897472 |
| Dnaaf1        | 0.7765069  | Pdgfc    | -0.82889986 |
| Pola1         | 0.7764635  | Krt85    | -0.82875872 |
| Taar4         | 0.77636004 | Prkcd    | -0.82853412 |
| Gm8232        | 0.77632428 | R3hcc1l  | -0.82834983 |
| Chmp6         | 0.7761922  | Sox13    | -0.82827544 |
| 4930483O08Rik | 0.7757478  | Ip6k2    | -0.8280492  |
| E430018J23Rik | 0.77574348 | Tns3     | -0.82799196 |
| 4930573I07Rik | 0.7754874  | Zkscan3  | -0.82773114 |
| Slc2a6        | 0.77537632 | Al846148 | -0.8276582  |
| 2410152P15Rik | 0.775321   | Xpnpep3  | -0.82763528 |
| Slc25a30      | 0.77532006 | Sema6c   | -0.8275924  |
| 4930563H03Rik | 0.7752218  | Heatr6   | -0.82757186 |
| Olfir1229     | 0.7751622  | Mical3   | -0.82741594 |
| Pgap1         | 0.7750783  | Socs4    | -0.82720136 |
| Ltbp1         | 0.77473212 | Abhd5    | -0.82704734 |

|               |            |               |             |
|---------------|------------|---------------|-------------|
| Evx2          | 0.77459716 | Eif2s3y       | -0.82702732 |
| 4930447J18Rik | 0.77454806 | Zc3h11a       | -0.82658768 |
| Rpl26         | 0.7745328  | Mnt           | -0.82610416 |
| Akt1          | 0.7744312  | Mib1          | -0.82606792 |
| Zfp618        | 0.7744274  | Tug1          | -0.82605792 |
| Aloxe3        | 0.77429628 | Snx4          | -0.82601166 |
| Trappc1       | 0.7742548  | Gt(ROSA)26Sor | -0.82592774 |
| 4930564C03Rik | 0.77390646 | Itch          | -0.82586766 |
| Pip5k1b       | 0.7736559  | Amn1          | -0.8258352  |
| Limd1         | 0.7736416  | Inip          | -0.82551814 |
| Eri3          | 0.7730813  | Ahcy          | -0.82548857 |
| Fam107b       | 0.77302312 | Upf2          | -0.82545996 |
| Rps6ka3       | 0.77252912 | 2610034B18Rik | -0.8252568  |
| Pde4a         | 0.7717185  | Serpine2      | -0.8251996  |
| Dkk1          | 0.77123308 | 4930455C13Rik | -0.8249526  |
| 1700112E06Rik | 0.7709825  | Arcn1         | -0.82485152 |
| Prep          | 0.77072096 | Ttc27         | -0.8247094  |
| Rgs7bp        | 0.770607   | Ptprk         | -0.82412386 |
| Cxcr4         | 0.77059888 | Rnf146        | -0.82397986 |
| Itgb3         | 0.7703614  | Smc4          | -0.82363606 |
| Mov10         | 0.77023888 | Acaa1b        | -0.8232994  |
| Agfg2         | 0.7700615  | Ankrd11       | -0.82315375 |
| Oprm1         | 0.7695098  | Diap2         | -0.8229518  |
| Dbndd1        | 0.7693744  | Cacnb3        | -0.8228302  |
| Gm31932       | 0.7693677  | Csnk1g3       | -0.8226538  |
| Mcm3          | 0.76888776 | Tnip3         | -0.82239104 |
| Gm32280       | 0.76876592 | Mfsd7b        | -0.82238388 |
| Hrsp12        | 0.76860952 | Gm9856        | -0.8218126  |
| Pygm          | 0.76848936 | Pcgf3         | -0.82152748 |
| Adap1         | 0.7681656  | Rbm39         | -0.82104588 |
| Cask          | 0.76805067 | Sharpin       | -0.82033968 |
| Bmp4          | 0.76791096 | Btg1-ps2      | -0.820189   |
| A430035B10Rik | 0.767725   | Cpne3         | -0.8196778  |
| Pdzd2         | 0.7672782  | Fbxl4         | -0.8196416  |
| Olf1030       | 0.76671744 | Odc1          | -0.81941652 |
| Fat2          | 0.76661826 | Dot1l         | -0.81941604 |
| Rhot2         | 0.7666173  | Magohb        | -0.81922484 |
| Ndufa11       | 0.76656914 | Sap30         | -0.81913996 |
| Mrpl36        | 0.76578188 | Mturn         | -0.81852984 |

|               |            |               |             |
|---------------|------------|---------------|-------------|
| Gm20362       | 0.76578    | Xbp1          | -0.81852007 |
| Fam110b       | 0.76567388 | Klhl2         | -0.81835604 |
| Gm28178       | 0.7653854  | Alcam         | -0.81817388 |
| Myh14         | 0.76534128 | Capza2        | -0.8180375  |
| Mboat7        | 0.7651448  | Tab1          | -0.81740428 |
| Tgds          | 0.76513434 | Zfp595        | -0.8173933  |
| Tuba8         | 0.76510096 | Rnf24         | -0.8169279  |
| Ints4         | 0.76505136 | Kdm1b         | -0.81692172 |
| Gm26588       | 0.76492833 | Pan3          | -0.81692076 |
| Ccny          | 0.76491308 | Ppard         | -0.81683112 |
| Chrnbl        | 0.7648058  | Fam13b        | -0.8165741  |
| Tas2r109      | 0.76476812 | Srsf5         | -0.81600523 |
| Pqlc2         | 0.76476192 | Mbnl2         | -0.8156004  |
| Wnt5b         | 0.7643528  | Fktn          | -0.815588   |
| Ager          | 0.76416826 | Sgol1         | -0.81524134 |
| Bbs9          | 0.76384926 | Ptp4a1        | -0.81511068 |
| Kcna7         | 0.7637639  | Dlg1          | -0.81371594 |
| Gm5860        | 0.76375866 | Ago4          | -0.813694   |
| Cyp4x1        | 0.76356364 | Lin9          | -0.81346274 |
| 2210015D19Rik | 0.76323652 | Epb4.1l4a     | -0.81327152 |
| Gm10510       | 0.7631371  | Synj1         | -0.8129206  |
| 4632433K11Rik | 0.76288796 | Mob2          | -0.8128953  |
| Zfp668        | 0.7627964  | Upb1          | -0.81283044 |
| Olfr229       | 0.76247788 | Fbxw11        | -0.81275702 |
| Fgf2os        | 0.76236964 | Ppp1r14c      | -0.81261348 |
| Gm19956       | 0.76229096 | 4933411E08Rik | -0.81236268 |
| Fam136a       | 0.76196432 | Man1a         | -0.81215334 |
| Nr1h2         | 0.76195336 | Chic1         | -0.811841   |
| Bin2          | 0.76192308 | Pip5k1l       | -0.8115592  |
| Ccdc50        | 0.76177216 | Mtus1         | -0.81104088 |
| Tmem176b      | 0.761703   | Dnajb9        | -0.81073141 |
| Atrx          | 0.761642   | Gm29992       | -0.8103442  |
| Olfr46        | 0.7613034  | Rnf103        | -0.810143   |
| Gemin4        | 0.76127004 | Pycr2         | -0.80955124 |
| Aanat         | 0.76125192 | Ubxn7         | -0.80943012 |
| Poc1a         | 0.7610631  | Stag2         | -0.80942916 |
| Ppif          | 0.7607546  | Ttc39aos1     | -0.80931568 |
| Gm2977        | 0.7606721  | C230099D08Rik | -0.80930328 |
| Tsc2          | 0.7606654  | Cltb          | -0.809278   |



|               |            |               |             |
|---------------|------------|---------------|-------------|
| Nif3l1        | 0.7606206  | Tbc1d9        | -0.80895424 |
| Ighmbp2       | 0.76033974 | Zfp692        | -0.8088994  |
| Slfn5         | 0.76030469 | 2810474O19Rik | -0.80880212 |
| Cacna1h       | 0.76027108 | Ltn1          | -0.80867434 |
| Ctnna2        | 0.7601037  | Iars2         | -0.80853606 |
| 4930549C15Rik | 0.7600875  | Slc9a7        | -0.8082161  |
| Dspp          | 0.76005554 | Peli1         | -0.80788326 |
| Gm3952        | 0.7596464  | Igf1r         | -0.80742884 |
| Sppl2c        | 0.75944448 | Zkscan6       | -0.80688524 |
| Tdh           | 0.7593441  | Dgkh          | -0.80685424 |
| Ikzf1         | 0.75920344 | Dnajb14       | -0.80681514 |
| Cherp         | 0.75888586 | Eps15l1       | -0.806787   |
| Ppp2r2a       | 0.75875807 | Uts2          | -0.80617046 |
| Skint9        | 0.75841904 | Foxn2         | -0.80597306 |
| Aldh16a1      | 0.75839376 | Pdpx          | -0.8059654  |
| LOC100862431  | 0.75835752 | Gan           | -0.80592204 |
| Coq7          | 0.75791264 | Cdkl4         | -0.80586457 |
| Cgnl1         | 0.75789546 | LOC101056219  | -0.8055744  |
| Gm12863       | 0.757833   | Sbno2         | -0.80537748 |
| Tti1          | 0.75748634 | Abtb2         | -0.80532932 |
| Txn2          | 0.75724412 | Smim14        | -0.80515624 |
| Fam71e1       | 0.75712442 | Crebl2        | -0.805151   |
| Btbd10        | 0.7570038  | Hmgn2         | -0.8048878  |
| Ly6g          | 0.7566762  | Pomgnt2       | -0.804883   |
| Gm3740        | 0.7564964  | Cir1          | -0.80487586 |
| Efr3a         | 0.7560468  | Slc31a2       | -0.80451108 |
| Gm3161        | 0.75602388 | Scd1          | -0.80401754 |
| Defb15        | 0.75587988 | Cpeb4         | -0.8037114  |
| C3            | 0.75586748 | Cbl           | -0.8036556  |
| Tubb4b        | 0.7550311  | Tex30         | -0.80358172 |
| Gulp1         | 0.75476456 | Maml1         | -0.803144   |
| Carkd         | 0.7547512  | Snhg5         | -0.803128   |
| Gm10142       | 0.75469924 | Elp6          | -0.80305886 |
| Gm14149       | 0.75469208 | Ctxn1         | -0.8029728  |
| Olf1571       | 0.75461722 | Pcnp          | -0.8029256  |
| Cd68          | 0.7543926  | N4bp2l1       | -0.80273772 |
| Ovch2         | 0.75389194 | 0610030E20Rik | -0.80228328 |
| LOC102638475  | 0.75369406 | Tmod3         | -0.80179644 |
| Cblc          | 0.75314856 | Atp6v1g2      | -0.8017554  |

|               |            |           |             |
|---------------|------------|-----------|-------------|
| Hivep3        | 0.75313044 | Tmem167b  | -0.80173826 |
| Magel2        | 0.75279188 | Rnf19a    | -0.801733   |
| Hist3h2ba     | 0.75269104 | Lrrc8b    | -0.8016896  |
| Tead4         | 0.75267506 | Unc119    | -0.8016038  |
| Olfr1252      | 0.7526393  | Sox9      | -0.8015399  |
| Plekhd1       | 0.75245952 | Fam32a    | -0.8013215  |
| Bmyc          | 0.75208234 | Mpc2      | -0.80101634 |
| Krtap5-1      | 0.7520294  | Arfgef3   | -0.80098676 |
| Gm35058       | 0.7519698  | Qser1     | -0.80012464 |
| Slc25a23      | 0.7517986  | Ankrd13b  | -0.79993772 |
| Pkig          | 0.7516241  | Mocs2     | -0.79947376 |
| Vwa1          | 0.75152016 | Gpatch2   | -0.7992692  |
| Atp9b         | 0.751421   | Gnl3l     | -0.7990594  |
| LOC100505025  | 0.75132274 | Vwa9      | -0.79871034 |
| Acy3          | 0.75128508 | Ube2g1    | -0.79847288 |
| Mkrn1         | 0.7511234  | Pdcd6ip   | -0.79828072 |
| 2700094K13Rik | 0.7510972  | Marf1     | -0.7982359  |
| Kcnc4         | 0.7510114  | Dr1       | -0.7980914  |
| Twsg1         | 0.75097752 | L3mbtl3   | -0.798069   |
| Coro2b        | 0.750607   | BB557941  | -0.7980242  |
| Eva1b         | 0.7504592  | Fam13b    | -0.79776668 |
| Ly6g6c        | 0.7502246  | Speer4f   | -0.7973356  |
| Arhgef38      | 0.7500384  | Fbxl3     | -0.79732894 |
| Dpp10         | 0.74996138 | Slc35f5   | -0.7968545  |
| Mdk           | 0.74986268 | Lin54     | -0.79680586 |
| Pdx1          | 0.74961472 | Angel1    | -0.7962842  |
| Micu1         | 0.7495842  | Nup50     | -0.79577636 |
| 1700001K19Rik | 0.74948406 | Abcc1     | -0.7957492  |
| Ifi204        | 0.7494426  | Purb      | -0.79530668 |
| Abhd12        | 0.74934768 | Fndc3a    | -0.79519988 |
| 2310075K07Rik | 0.74928712 | Atp2c1    | -0.79492044 |
| Olfr360       | 0.74921226 | Anapc16   | -0.79489184 |
| Zfp691        | 0.7488699  | Rock1     | -0.794775   |
| Spryd4        | 0.74881744 | Gm34463   | -0.7946944  |
| Capn1         | 0.74880504 | D11Wsu47e | -0.79456568 |
| Trmt5         | 0.74841308 | Dnajb4    | -0.79429054 |
| E2f6          | 0.74799776 | Supt20    | -0.7942858  |
| D730045A05Rik | 0.74755454 | Uck2      | -0.79404116 |
| Flt3l         | 0.74731636 |           |             |
|               |            | 8-Mar     | -0.793942   |

|               |            |               |             |
|---------------|------------|---------------|-------------|
| Nfyc          | 0.74706172 | Setd1b        | -0.79394054 |
| Slc47a2       | 0.74701214 | Extl1         | -0.79359484 |
| Setd3         | 0.7465944  | Zkscan6       | -0.7933078  |
| Ppfibp1       | 0.7459974  | Unc5a         | -0.7930188  |
| Coq6          | 0.7459855  | Sft2d1        | -0.7927599  |
| Cir1          | 0.74562264 | Higd1a        | -0.79247808 |
| Rrp15         | 0.74552488 | Tnks          | -0.7923584  |
| LOC102641065  | 0.74545812 | Slc16a7       | -0.7921958  |
| Kcp           | 0.74527788 | Mex3c         | -0.7921872  |
| Aqp4          | 0.74524688 | Map2k1        | -0.7921734  |
| Ruvbl2        | 0.7450166  | Rgs9          | -0.79202176 |
| Cryab         | 0.74475718 | Hmgxb3        | -0.7919674  |
| AU024581      | 0.74452066 | Rpf1          | -0.79175686 |
| 4931428A05Rik | 0.74439288 | 3-Mar         | -0.79168034 |
| Zfp940        | 0.74429464 | 1700064E03Rik | -0.79156112 |
| Mcu           | 0.74414206 | ltpkb         | -0.79139424 |
| Grasp         | 0.74407292 | Fam196a       | -0.79125214 |
| Myh7          | 0.74395872 | Zfp111        | -0.7909908  |
| 5330411J11Rik | 0.74382376 | Brd8          | -0.79093934 |
| Gm13657       | 0.74374724 | Ankrd52       | -0.79089976 |
| C9            | 0.74345684 | Srxn1         | -0.79070807 |
| C030011L09Rik | 0.74340772 | Eif4a2        | -0.79044199 |
| Gm33301       | 0.7433672  | Padi2         | -0.78992652 |
| G0s2          | 0.74335408 | Dido1         | -0.78977252 |
| Pik3cd        | 0.74334    | Smarca5-ps    | -0.78976012 |
| Inpp4a        | 0.7431817  | Mtif2         | -0.78973294 |
| 1810062O18Rik | 0.742764   | Uggt1         | -0.78964996 |
| 6330415G19Rik | 0.74264144 | Cbll1         | -0.78944684 |
| Sult5a1       | 0.74239874 | Jade3         | -0.78933144 |
| Kcnh1         | 0.74234486 | Ndfip1        | -0.78923274 |
| Vps13c        | 0.74218464 | Cited2        | -0.78859996 |
| Crlf2         | 0.74195384 | Ets2          | -0.7884126  |
| Rars2         | 0.74194146 | Rbm25         | -0.78809166 |
| Grtp1         | 0.74190568 | Lmtk2         | -0.78790474 |
| Aars          | 0.74189186 | Stag1         | -0.7874875  |
| 4930519P11Rik | 0.741694   | Glul          | -0.7874775  |
| Gcm1          | 0.74157953 | Ern1          | -0.7874465  |
| Pogz          | 0.7414818  | Camk2n1       | -0.7872844  |
| Erh           | 0.74138976 | Polr1c        | -0.78724    |

|               |            |               |             |
|---------------|------------|---------------|-------------|
| Zfp692        | 0.7412162  | Herpud1       | -0.7870307  |
| Pde11a        | 0.74110556 | Pard3         | -0.78682708 |
| Gm6252        | 0.74100924 | Irf2bpl       | -0.7866998  |
| Olfir868      | 0.74098444 | BC027231      | -0.78621292 |
| Gm33619       | 0.74081516 | Ugcg          | -0.7861066  |
| Angptl6       | 0.74035454 | Slfn2         | -0.78580046 |
| Scrn1         | 0.7400031  | Il6st         | -0.78532172 |
| Mettl6        | 0.73976516 | Ccdc71        | -0.7845578  |
| Xpo7          | 0.73956824 | Arhgap5       | -0.78446484 |
| Ephb2         | 0.7395196  | Gatm          | -0.78418446 |
| Gm15800       | 0.73944664 | Usp49         | -0.78415752 |
| Galnt12       | 0.73930216 | Acadsb        | -0.78399944 |
| Tti1          | 0.73916626 | Wdr33         | -0.78386784 |
| Map2k5        | 0.7386186  | Mbtd1         | -0.7838049  |
| Gm16793       | 0.7382803  | Kmt2a         | -0.7836242  |
| Map6          | 0.73804616 | 2700081O15Rik | -0.78353452 |
| Slc4a3        | 0.7380426  | Ptk2          | -0.7835331  |
| Pik3r6        | 0.7379074  | 2010111I01Rik | -0.78351164 |
| Bcap29        | 0.7371998  | Wfdc12        | -0.78322554 |
| Cryba4        | 0.73718404 | Socs7         | -0.78303957 |
| Gabbr1        | 0.7371807  | Zfp664        | -0.7828636  |
| Gm31531       | 0.7370362  | Tmem106a      | -0.78278876 |
| Sssca1        | 0.7368264  | Cep162        | -0.78271676 |
| A930037O16Rik | 0.73675108 | Top2b         | -0.78257894 |
| Abcg8         | 0.7365532  | Serpinb1c     | -0.7824459  |
| 4933402N03Rik | 0.73620963 | Phlda3        | -0.78237868 |
| Pdpf          | 0.73593664 | Ccng2         | -0.78232    |
| Ankrd66       | 0.73578501 | Haus4         | -0.7821212  |
| Tsen54        | 0.73577214 | Eri1          | -0.78172016 |
| 4930444G20Rik | 0.73566246 | Parp16        | -0.78164292 |
| Nme3          | 0.73473072 | Coil          | -0.7815666  |
| Abcd4         | 0.73452472 | Nol8          | -0.78149844 |
| Elfn2         | 0.73443604 | Lrrc40        | -0.7814822  |
| Trim35        | 0.7343607  | lws1          | -0.7812605  |
| Smpd4         | 0.73435974 | Dpp3          | -0.781127   |
| 4833420G17Rik | 0.73423528 | Nap1l3        | -0.78090572 |
| Klrg2         | 0.7341294  | Tars2         | -0.78081608 |
| Cldn15        | 0.7340703  | Ankhd1        | -0.78081226 |
| 1700080G11Rik | 0.7340455  | Cyth1         | -0.78075456 |

|               |            |               |             |
|---------------|------------|---------------|-------------|
| Vmn1r30       | 0.7339444  | Itsn2         | -0.7805486  |
| Ehf           | 0.73388768 | Ptf1a         | -0.78048276 |
| Lmod3         | 0.73369074 | Ei24          | -0.780272   |
| Hsbp1l1       | 0.73355436 | Srek1         | -0.78024768 |
| Akt1          | 0.73353148 | Dnajib2       | -0.7800832  |
| Uba2          | 0.73351336 | Trak1         | -0.7798028  |
| Wbp1          | 0.73324966 | Zfp322a       | -0.77956056 |
| Ldlr          | 0.7331114  | Slco3a1       | -0.77955628 |
| Fbxo25        | 0.73310804 | 1700030A11Rik | -0.7795024  |
| Gm36254       | 0.73284864 | Pak2          | -0.7794938  |
| Arid4a        | 0.73280192 | Chm           | -0.77947474 |
| U2af1l4       | 0.73260641 | Tax1bp1       | -0.77946806 |
| Gm33990       | 0.732563   | C87436        | -0.77911472 |
| Gm13177       | 0.73243046 | Ppfia1        | -0.77871608 |
| 4930412O13Rik | 0.73227834 | Ezh1          | -0.778646   |
| Rnf8          | 0.73221684 | Galnt7        | -0.77843714 |
| Mtap          | 0.73203516 | Esco1         | -0.77826166 |
| Gpt2          | 0.7319608  | 8430419K02Rik | -0.778245   |
| Nxpe2         | 0.7318635  | Nphp4         | -0.77772403 |
| Sspn          | 0.73172616 | Aldh3a2       | -0.7777152  |
| Yif1b         | 0.7315488  | Ccl27a        | -0.77763414 |
| Cplx2         | 0.73152399 | 2900093K20Rik | -0.77760888 |
| Cep83         | 0.73119974 | Csnk1g1       | -0.7775774  |
| Olf1r61       | 0.73108363 | Eif3a         | -0.77744626 |
| Fads1         | 0.7310419  | Usf1          | -0.77702714 |
| 2810471M01Rik | 0.73067808 | Sh3bgrl2      | -0.7768798  |
| Chrng         | 0.73067069 | Fbxw9         | -0.7767005  |
| Ccdc144b      | 0.730433   | Ypel3         | -0.7761464  |
| 1700006H21Rik | 0.730412   | Zfp58         | -0.77610254 |
| Zfp329        | 0.73026132 | 2410016O06Rik | -0.7759347  |
| Chmp7         | 0.73011684 | Sec23a        | -0.77519608 |
| Timm9         | 0.73002434 | 1810026B05Rik | -0.77467536 |
| Ninj1         | 0.7299509  | Dgka          | -0.774652   |
| Ppih          | 0.72970152 | Pim3          | -0.77453852 |
| Lmntd2        | 0.72955514 | Csnk1e        | -0.77438164 |
| Nphs1         | 0.7294922  | Nrp           | -0.774312   |
| Rnasek        | 0.72945547 | Tnip2         | -0.7742734  |
| Wwc2          | 0.728642   | Slc30a9       | -0.7741375  |
| D930030F02Rik | 0.7284627  | Far2          | -0.77400732 |

|               |            |               |             |
|---------------|------------|---------------|-------------|
| Cfap44        | 0.72834803 | Rgs12         | -0.77399516 |
| Hmgcr         | 0.7283354  | Skor2         | -0.77398372 |
| 3110079O15Rik | 0.7280922  | Mettl21a      | -0.7739754  |
| Tnrc18        | 0.72807836 | Mtrf1l        | -0.77385688 |
| Rhno1         | 0.7279556  | Hp1bp3        | -0.77366018 |
| Lig3          | 0.7278404  | Pcif1         | -0.7734375  |
| Man1c1        | 0.7276306  | Brwd1         | -0.7726531  |
| LOC105243184  | 0.72759914 | Ppapdc2       | -0.7725401  |
| Acads         | 0.7271352  | Ppid          | -0.7724638  |
| Coa6          | 0.72699452 | Lpin2         | -0.77234792 |
| Fgd5          | 0.72697544 | Msh6          | -0.77177668 |
| Casz1         | 0.72669744 | Acsl1         | -0.77149964 |
| Dnajc16       | 0.72654486 | Tsc22d2       | -0.77143526 |
| 1600023N17Rik | 0.7261014  | Ptpn14        | -0.77117968 |
| Cd209d        | 0.7260971  | Tbp           | -0.77116632 |
| Mxd1          | 0.72601414 | Kcnq5         | -0.77113724 |
| Ranbp17       | 0.72581196 | Pacs1         | -0.7710066  |
| Gm9292        | 0.72577428 | Tctn3         | -0.77037357 |
| Scd4          | 0.72561408 | Dnmbp         | -0.77033424 |
| Ica1l         | 0.72552156 | Mthfs         | -0.7702656  |
| Naa35         | 0.72523356 | 4932438A13Rik | -0.76969146 |
| Tatdn1        | 0.72517776 | Orc3          | -0.76967168 |
| Nbas          | 0.7251761  | Mysm1         | -0.7696142  |
| Agpat2        | 0.72499276 | Stxbp3        | -0.76953364 |
| Gm10869       | 0.7249408  | Marveld3      | -0.7694268  |
| Abca7         | 0.7247596  | Pitpnc1       | -0.76941824 |
| Mrs2          | 0.7247     | lqcc          | -0.7690487  |
| Olf128        | 0.72460604 | LOC102641500  | -0.7689042  |
| Slc44a1       | 0.7243042  | Tmtc4         | -0.76815748 |
| Med12         | 0.72411632 | Ccl27a        | -0.7678399  |
| Atp9a         | 0.72406816 | 9430015G10Rik | -0.76757526 |
| LOC105243337  | 0.72388648 | Lym4          | -0.76733304 |
| Dok7          | 0.72373868 | Elf2          | -0.76730776 |
| Apod          | 0.7235894  | Sdhaf2        | -0.7669158  |
| 5430401F13Rik | 0.72357464 | Kif2a         | -0.76677132 |
| Papss1        | 0.72340966 | Eid2          | -0.76674986 |
| Kifc1         | 0.72338557 | Ttc3          | -0.76656724 |
| Ccbl2         | 0.7233472  | Snhg12        | -0.7664156  |
| Zdhhc3        | 0.7233052  | Nudt2         | -0.76622676 |

|               |            |               |             |
|---------------|------------|---------------|-------------|
| Snrpd3        | 0.72305584 | Abcf1         | -0.7658644  |
| Apba2         | 0.72305346 | Zmym4         | -0.765862   |
| Cxx1c         | 0.72295666 | 6330416G13Rik | -0.765862   |
| Nog           | 0.7229228  | Adipor2       | -0.7655282  |
| Lamb1         | 0.7228484  | Gm4737        | -0.76544713 |
| Trmt1         | 0.72277784 | Rab10         | -0.765223   |
| Tmem74bos     | 0.72259426 | B4galt1       | -0.76521636 |
| 6720473M11Rik | 0.72242688 | Med13l        | -0.7650609  |
| Hand1         | 0.72240805 | Trim8         | -0.76501036 |
| Ndufaf7       | 0.7223649  | Fam134b       | -0.76474428 |
| AU022751      | 0.72221612 | Nap1l4        | -0.76439952 |
| Prkch         | 0.72220994 | Ifi27         | -0.76428032 |
| Tom1          | 0.72218848 | Hmgb3         | -0.7641988  |
| Slc11a2       | 0.72191716 | Nt5dc3        | -0.76413394 |
| Smco1         | 0.72190476 | Phf20l1       | -0.76398564 |
| Psmc1         | 0.7218518  | Lrrc16a       | -0.7637596  |
| Fam20c        | 0.72145844 | Mdm2          | -0.76375628 |
| 1810044D09Rik | 0.72131204 | Zfp263        | -0.76343154 |
| Msi1          | 0.72097492 | Wac           | -0.76338912 |
| Gsn           | 0.7209673  | Gm9855        | -0.763031   |
| Acsl5         | 0.72080756 | Ccpg1         | -0.76293992 |
| Gm34616       | 0.720201   | Nop56         | -0.76254224 |
| Cst6          | 0.72018432 | Glyr1         | -0.76228    |
| Cops3         | 0.72015286 | Cachd1        | -0.76226426 |
| Nrg1          | 0.7199826  | Dync1i2       | -0.76223612 |
| Habp2         | 0.71976424 | Mtor          | -0.76184988 |
| Mettl7a1      | 0.71972228 | Harbi1        | -0.7617912  |
| Ybx2          | 0.7195344  | Rcan1         | -0.76167822 |
| Tprn          | 0.71934796 | Nfxl1         | -0.7614322  |
| Sars2         | 0.7193389  | Zfp654        | -0.7610178  |
| Prss37        | 0.7193265  | Ndfip1        | -0.76032304 |
| Txnrd2        | 0.71929168 | Itsn1         | -0.7602954  |
| Mrps22        | 0.7191014  | Olf446        | -0.76007224 |
| 2810405F17Rik | 0.71900296 | Pgk1          | -0.75978993 |
| Cxx1b         | 0.71891308 | Bcl2l11       | -0.75962352 |
| Olf711        | 0.7188878  | Glul          | -0.7595725  |
| Usp20         | 0.71887064 | Eif2ak3       | -0.75952672 |
| Tnfrsf1b      | 0.7187314  | Dennd4c       | -0.75948572 |
| Mrgprx2       | 0.71814156 | Npepps        | -0.75941228 |

|               |            |               |             |
|---------------|------------|---------------|-------------|
| Gm41515       | 0.7172203  | Serinc4       | -0.75882388 |
| Plxna2        | 0.71706272 | LOC105243204  | -0.75852204 |
| Tbc1d30       | 0.71693754 | Abl2          | -0.75833416 |
| Ptpdc1        | 0.71686888 | Chd8          | -0.75742054 |
| Gm10615       | 0.7165642  | 4930503L19Rik | -0.7574091  |
| Tmsb15a       | 0.71639156 | Ppp1r10       | -0.75695944 |
| 4930579G18Rik | 0.71632432 | Sucla2        | -0.7567806  |
| Dgcr2         | 0.71627188 | Epb4.1l5      | -0.75627708 |
| Mvd           | 0.71624566 | Ppp2r3a       | -0.75623704 |
| Mirc35hg      | 0.71596956 | Tmem68        | -0.7561946  |
| Armc10        | 0.71594668 | Paqr3         | -0.7558775  |
| Smarcal1      | 0.71580314 | Osmr          | -0.7558408  |
| Gm10997       | 0.71542644 | Flad1         | -0.75575876 |
| Hif1an        | 0.7153778  | Zfp426        | -0.75575256 |
| Prkca         | 0.7153344  | Ift57         | -0.75573348 |
| Psmc3         | 0.71533347 | Lamp3         | -0.7556772  |
| 3010003L21Rik | 0.71521616 | Snx1          | -0.75549412 |
| 1810012K16Rik | 0.71502686 | Tlk1          | -0.75546312 |
| Gm34735       | 0.71482038 | Fbxw11        | -0.75542688 |
| Bdkrb1        | 0.71468354 | Uhrf2         | -0.75533676 |
| Elovl1        | 0.7143526  | Fam132b       | -0.75515604 |
| Atp5g1        | 0.7141385  | LOC102643033  | -0.7547555  |
| Nox1          | 0.7141094  | Mpzl3         | -0.75461674 |
| Rangap1       | 0.71408607 | Stx4a         | -0.7543564  |
| Ptprs         | 0.7140627  | Sgce          | -0.75383664 |
| Anks6         | 0.71399928 | Hbs1l         | -0.75377846 |
| Slc25a24      | 0.7139344  | Apol9b        | -0.753633   |
| Rbp3          | 0.71382952 | H2-Q2         | -0.75351    |
| Mapk6         | 0.71379708 | Sipa1l3       | -0.7534194  |
| Zfpm1         | 0.7137008  | Wdr92         | -0.75333024 |
| AI844869      | 0.71365834 | Pink1         | -0.7533288  |
| Entpd1        | 0.7134266  | Clic1         | -0.75325632 |
| Gm4969        | 0.7133851  | Mdn1          | -0.75313712 |
| Scml2         | 0.71313954 | Rps6kc1       | -0.7530856  |
| Gm13598       | 0.7130866  | Fam174a       | -0.75304412 |
| Olfir744      | 0.71308566 | Armc8         | -0.75287008 |
| Lrp8          | 0.71297074 | Rab5b         | -0.75235272 |
| Fxyd3         | 0.71293974 | Rab3gap2      | -0.75204896 |
| Tulp3         | 0.71266746 | Cdh2          | -0.752007   |



|               |            |          |             |
|---------------|------------|----------|-------------|
| Gm31896       | 0.7126193  | Elf1     | -0.75165654 |
| Sell          | 0.7125163  | Zc3h7a   | -0.75150204 |
| BC029214      | 0.7123728  | Golga4   | -0.7509427  |
| Park2         | 0.71229028 | Cnm3     | -0.75093936 |
| Slc12a4       | 0.7122717  | Myo1b    | -0.7508588  |
| LOC102638515  | 0.711463   | Sst      | -0.75083112 |
| Stim1         | 0.71098328 | Ddx19a   | -0.7505808  |
| Sdhaf2        | 0.71041728 | Irak2    | -0.750267   |
| Mpdu1         | 0.71023988 | Sptlc2   | -0.7499013  |
| Ppfia3        | 0.71003008 | Cdkl2    | -0.74980212 |
| Xylt2         | 0.70983196 | Fignl1   | -0.74972392 |
| Plcb2         | 0.70981836 | Xbp1     | -0.74969816 |
| Tbc1d31       | 0.70938492 | Me2      | -0.7495122  |
| 8430408G22Rik | 0.70926904 | Dmd      | -0.74948884 |
| Ppdf          | 0.7090926  | Dnase1l2 | -0.74946928 |
| 5430403N17Rik | 0.709075   | lqgap1   | -0.74932814 |
| Ccdc82        | 0.70902586 | lfrd1    | -0.74926996 |
| Hrasls5       | 0.7086334  | Cdk19    | -0.7492242  |
| Celf4         | 0.7086277  | Sbds     | -0.74907636 |
| Inpp5e        | 0.70826148 | Bcl6     | -0.7489996  |
| Dpp8          | 0.7081704  | Rrm1     | -0.74866104 |
| Tmem28        | 0.7076936  | Nop16    | -0.7485342  |
| Kdm5a         | 0.70763492 | Zbtb42   | -0.7484994  |
| Dnajc18       | 0.70751906 | Fam60a   | -0.74843264 |
| Aven          | 0.70747614 | Snx14    | -0.74814128 |
| Pja1          | 0.7074394  | Ralgapa2 | -0.74811984 |
| Gm19576       | 0.70658826 | Ago2     | -0.748075   |
| Gm2837        | 0.70652104 | Phyhd1   | -0.7475414  |
| Chfr          | 0.70641708 | Aph1c    | -0.7474022  |
| Tulp1         | 0.70637036 | Ncor1    | -0.74713516 |
| Guk1          | 0.7061982  | Raet1c   | -0.74700976 |
| Zfp672        | 0.70610666 | Dnajc21  | -0.746511   |
| Impact        | 0.70598675 | Dusp12   | -0.7462506  |
| H2-Q4         | 0.7059865  | Tmem254c | -0.74619246 |
| Tbx10         | 0.70596886 | Szrd1    | -0.7461114  |
| Apex1         | 0.7059679  | Tsen15   | -0.74608374 |
| Cdc20         | 0.70590306 | Gm34786  | -0.74592066 |
| E130304I02Rik | 0.7057271  | Alg8     | -0.74578952 |
| Thnsl2        | 0.70535994 | Nmnat3   | -0.7457552  |

|               |            |             |             |
|---------------|------------|-------------|-------------|
| Gm30423       | 0.7053404  | Pik3cb      | -0.7456374  |
| Lrrc45        | 0.705266   | Ncoa6       | -0.74538564 |
| Plcd4         | 0.70480323 | Eif2ak1     | -0.74531746 |
| Gripap1       | 0.70473146 | Tmem181b-ps | -0.7452402  |
| Nkiras2       | 0.70469188 | Klc1        | -0.7449894  |
| Actl6a        | 0.70469046 | Blzf1       | -0.74488473 |
| Pak6          | 0.7045884  | Cd81        | -0.74465608 |
| LOC102638913  | 0.7043891  | Rap1a       | -0.7443876  |
| 4632404H12Rik | 0.70433688 | Ankrd17     | -0.74431204 |
| Zfp433        | 0.704154   | Sec62       | -0.7441964  |
| Tnfsf8        | 0.70401716 | Gm6654      | -0.7440424  |
| Gm4208        | 0.70376348 | Rap2c       | -0.7439971  |
| Il1f8         | 0.703527   | Nipbl       | -0.7439232  |
| Olf801        | 0.70338774 | Frmd8       | -0.7439132  |
| Polr2c        | 0.7032304  | Cd81        | -0.7438178  |
| Fam78a        | 0.7029667  | Serp1       | -0.74353361 |
| Rrp1b         | 0.70277786 | Amn1        | -0.7433648  |
| Enoph1        | 0.70275974 | H2-Q8       | -0.742846   |
| Tjp3          | 0.70266152 | Mapk12      | -0.7427306  |
| Ift27         | 0.7026572  | Ldlrad3     | -0.7427058  |
| Rbakdn        | 0.70249366 | Unkl        | -0.74228096 |
| Uaca          | 0.70207334 | Rbbp6       | -0.74206304 |
| Elmo3         | 0.70206786 | Zfyve1      | -0.7419882  |
| Rbms2         | 0.7019956  | Nucks1      | -0.74194384 |
| Scd4          | 0.70192766 | Sfpq        | -0.7416892  |
| Atp6ap1       | 0.70183898 | Rpp38       | -0.7413626  |
| Tbc1d17       | 0.70179224 | Glt28d2     | -0.74067116 |
| D630028G08Rik | 0.70173264 | Pced1a      | -0.74063492 |
| Gm10129       | 0.70166277 | Magi3       | -0.740283   |
| Gm7168        | 0.7014122  | Prpf38b     | -0.74018908 |
| Nxph4         | 0.7013607  | Wdr36       | -0.74012708 |
| 4930415O20Rik | 0.701282   | Ern1        | -0.7399626  |
| Inpp5b        | 0.7011986  | Fnip2       | -0.7398362  |
| Il34          | 0.7011628  | Wdsub1      | -0.73955346 |
| Rnf41         | 0.70056534 | Fnbp1l      | -0.7395525  |
| Taar7f        | 0.7005544  | Slc7a6      | -0.73934174 |
| Gm36236       | 0.7005334  | Terf2ip     | -0.73920536 |
| Hgfac         | 0.700459   | Gpatch4     | -0.73908186 |
| Crhr2         | 0.7002034  | Tle3        | -0.7389965  |

|               |            |               |             |
|---------------|------------|---------------|-------------|
| Cdk17         | 0.70015716 | Serpinb6c     | -0.73888016 |
| Scarletltr    | 0.6989255  | Mccc2         | -0.73882365 |
| Pak3          | 0.69883012 | Klf7          | -0.7385664  |
| Gm10426       | 0.69867087 | 1700031C06Rik | -0.7385516  |
| Ttll7         | 0.6986594  | Mettl14       | -0.73844624 |
| Nck1          | 0.69855546 | Nbea          | -0.73844123 |
| 2310009A05Rik | 0.6985254  | Map2          | -0.73821068 |
| Cks1b         | 0.69844746 | 1110059G10Rik | -0.73795796 |
| Cd300e        | 0.6982789  | Svil          | -0.7378602  |
| Rps6ka4       | 0.69811868 | Mbp           | -0.7376952  |
| Prss28        | 0.6979108  | Cdkn2aip      | -0.73740864 |
| Map2k3os      | 0.69763828 | Gm13375       | -0.73733092 |
| Rarg          | 0.69728566 | Map3k5        | -0.7371874  |
| Nr3c1         | 0.696856   | Ccdc13        | -0.73714304 |
| Htt           | 0.69658946 | Map7          | -0.73704672 |
| Neil2         | 0.6965618  | Gnas          | -0.73698854 |
| Taf5l         | 0.69644928 | Thoc2         | -0.7369094  |
| Tubb4b        | 0.69644404 | Usp54         | -0.73676156 |
| D2Wsu81e      | 0.69640732 | Gna13         | -0.73655748 |
| Tcn2          | 0.69574976 | Lrrc58        | -0.73651124 |
| Gm6328        | 0.69571686 | Susd6         | -0.73649836 |
| Mcm5          | 0.69571448 | Mcat          | -0.7364235  |
| Pprc1         | 0.69549752 | Edem1         | -0.73618984 |
| Zfp111        | 0.6954689  | Uhrf1bp1      | -0.73617316 |
| 1700012L04Rik | 0.69525814 | Rnf19a        | -0.73609114 |
| 1810022K09Rik | 0.69512892 | Zfp106        | -0.73589134 |
| Dhrsx         | 0.6949978  | Herc4         | -0.73588944 |
| Hnrnpr        | 0.69493532 | Bax           | -0.73585654 |
| Cipc          | 0.69491672 | P4ha1         | -0.7358146  |
| Olf60         | 0.69480992 | Haus6         | -0.73570872 |
| Vax2          | 0.69479322 | Itm2c         | -0.73561668 |
| Gm38733       | 0.6947918  | Rock1         | -0.73555184 |
| AI662168      | 0.69468116 | Itpril2       | -0.7354145  |
| Npr2          | 0.69371604 | Dopey2        | -0.73537732 |
| Gm5458        | 0.69346094 | Rbm26         | -0.735363   |
| Pdik1l        | 0.6934562  | Chic2         | -0.73512126 |
| Lcn2          | 0.6933398  | Sestd1        | -0.7349515  |
| Hint2         | 0.69309474 | Krt7          | -0.73482704 |
| Mtfr1l        | 0.6930566  | Brd8          | -0.7347641  |

|               |            |               |             |
|---------------|------------|---------------|-------------|
| Tmem120b      | 0.69296884 | Spire2        | -0.73472166 |
| 1700123O20Rik | 0.69290686 | Aqp11         | -0.73463488 |
| Hsd17b7       | 0.6919036  | Shmt2         | -0.73448134 |
| Mtfr1l        | 0.69176722 | Tmem106b      | -0.7343836  |
| Crispld2      | 0.6916287  | Zfp212        | -0.73434734 |
| Grhl2         | 0.6915307  | Rbbp7         | -0.73430014 |
| Mup20         | 0.69138026 | Zgpat         | -0.73428106 |
| Pifo          | 0.6912708  | Epc1          | -0.73406934 |
| Tnfsf10       | 0.6912408  | Gnai3         | -0.73395587 |
| Muc19         | 0.69112254 | Exosc7        | -0.7339058  |
| Ttll4         | 0.69092608 | Tap1          | -0.73385334 |
| Ndufa3        | 0.6909032  | R3hdm1        | -0.73350192 |
| Gm16287       | 0.69064474 | Gemin4        | -0.7330501  |
| Ttc17         | 0.6905613  | Trim27        | -0.73287964 |
| Zfp950        | 0.6904502  | Gpatch1       | -0.73284793 |
| Rhox3h        | 0.690434   | Letmd1        | -0.7327776  |
| Mmaa          | 0.69033528 | Zdhhc13       | -0.73230172 |
| Klf12         | 0.69007254 | 8430419L09Rik | -0.73188924 |
| Slc1a5        | 0.69005776 | Actl6a        | -0.7318139  |
| Gm31980       | 0.69001054 | Ahcyl1        | -0.7312918  |
| Clstn3        | 0.68996287 | Guf1          | -0.73088074 |
| Sult4a1       | 0.6898904  | Rbm18         | -0.7304392  |
| 4921507G05Rik | 0.68979406 | Ggps1         | -0.73042774 |
| Hace1         | 0.68979072 | Zfp507        | -0.73036814 |
| Arhgef10      | 0.6897297  | Aoc2          | -0.73022174 |
| Ralgps2       | 0.6897211  | Mtmr6         | -0.7301035  |
| Necab2        | 0.68945694 | Trit1         | -0.7296982  |
| Gpt2          | 0.68917704 | Fam210a       | -0.7294135  |
| Olf1420       | 0.68888236 | Slc25a22      | -0.7291689  |
| Dennd4b       | 0.68878316 | Gga1          | -0.7289028  |
| 1700120C14Rik | 0.6887288  | Stat6         | -0.7288251  |
| Ppp2r1b       | 0.68860292 | Arhgef10l     | -0.72877264 |
| Matn2         | 0.6885953  | Dnmt3b        | -0.7287302  |
| Tenm2         | 0.68846654 | Ccdc109b      | -0.72867632 |
| Gtf2f1        | 0.68840646 | Brms1         | -0.728559   |
| Cttnbp2nl     | 0.68834734 | Slc39a9       | -0.72853994 |
| Tbc1d10c      | 0.68833972 | Ankhd1        | -0.7284522  |
| Slc2a13       | 0.6881919  | Rnf138        | -0.72842836 |
| Gm20063       | 0.68816614 | Osbp19        | -0.7282028  |

|               |            |           |             |
|---------------|------------|-----------|-------------|
| Lamtor1       | 0.68803072 | Srf       | -0.7281394  |
| Tlx2          | 0.68796014 | Usp25     | -0.72811174 |
| Rnu1b1        | 0.687932   | Uimc1     | -0.7277684  |
| Gm14243       | 0.6877208  | Zfp236    | -0.7277484  |
| R74862        | 0.6877084  | Mesdc1    | -0.72755    |
| Dtnb          | 0.687377   | Mrgpra9   | -0.72737264 |
| Arl4c         | 0.687376   | Marcks    | -0.72635317 |
| 2310005E17Rik | 0.6872201  | Mrrf      | -0.7262516  |
| Rab44         | 0.6872196  | Pde7a     | -0.72612452 |
| Umps          | 0.68705105 | Rela      | -0.72605944 |
| Ccdc116       | 0.68697166 | Fndc3a    | -0.72604608 |
| Sema6d        | 0.68662429 | Mphosph10 | -0.725976   |
| Reep6         | 0.6864953  | Scrn3     | -0.72595644 |
| Obsl1         | 0.68640996 | Taf4a     | -0.72571612 |
| Tgfb1         | 0.68620563 | Cggbp1    | -0.72545004 |
| Zfp64         | 0.68615294 | Mafk      | -0.7251272  |
| Daxx          | 0.6861391  | Ahcyl1    | -0.7249522  |
| Msto1         | 0.6858902  | Scnm1     | -0.7249403  |
| Evi5l         | 0.68567132 | Mapk1ip1l | -0.72481393 |
| 1700031M16Rik | 0.6854396  | Stx1a     | -0.72472954 |
| Polr1e        | 0.6850426  | Atpaf2    | -0.72469092 |
| Sdhaf1        | 0.6847949  | Pnlsr     | -0.72467994 |
| Tssk5         | 0.684793   | Gm15350   | -0.72443317 |
| LOC102642673  | 0.68475104 | Mthfsl    | -0.7242508  |
| Sema5a        | 0.68462896 | Wee1      | -0.72407008 |
| Tnfaip1       | 0.6845541  | Uprt      | -0.723927   |
| Sh2d4b        | 0.68447709 | Cldn23    | -0.723866   |
| Aamdc         | 0.68445254 | Olfr207   | -0.7238617  |
| Vcp           | 0.6844201  | Sorbs3    | -0.72374916 |
| Wash1         | 0.6843605  | Atxn7l3b  | -0.72373534 |
| LOC102632383  | 0.6843314  | Upf3b     | -0.72359992 |
| Gm38409       | 0.68417024 | Stmn1     | -0.72358179 |
| Gm32232       | 0.68415832 | Peg13     | -0.7234616  |
| Ern2          | 0.68399906 | Hist1h4j  | -0.7232709  |
| Vcl           | 0.68395376 | Carhsp1   | -0.72297144 |
| Bcar1         | 0.68379068 | Scamp1    | -0.72292184 |
| Cd44          | 0.68360614 | Cdc42ep4  | -0.72290946 |
| Grik1         | 0.68334628 | Tmem70    | -0.722878   |
| 4930442B02Rik | 0.6832924  | Larp1b    | -0.72278548 |

|               |            |               |             |
|---------------|------------|---------------|-------------|
| Efna4         | 0.6830864  | Ppat          | -0.7227583  |
| Dnah6         | 0.68293357 | Cgrrf1        | -0.72257184 |
| Chst3         | 0.6827216  | Smn1          | -0.72233844 |
| 2210022D18Rik | 0.6827102  | Scn11a        | -0.72222685 |
| Osgep         | 0.68267632 | Sema7a        | -0.72209692 |
| Ly6g5b        | 0.68255092 | Mast3         | -0.72179556 |
| D1Ertd622e    | 0.6824384  | 1110038B12Rik | -0.721766   |
| 5830415F09Rik | 0.68214464 | Cand1         | -0.721653   |
| Golt1b        | 0.6818738  | Atp5sl        | -0.7216172  |
| Ccdc59        | 0.68180084 | Tmem29        | -0.7214923  |
| Bst2          | 0.6817794  | Naa16         | -0.7214017  |
| Wapal         | 0.68139934 | Mmadhc        | -0.72137308 |
| Hmbs          | 0.68123912 | Phldb1        | -0.72132968 |
| 4930519L02Rik | 0.68111848 | Trim16        | -0.72125912 |
| Vmn1r175      | 0.6810756  | Ube2t         | -0.72116614 |
| Klk10         | 0.68089104 | Tbc1d30       | -0.72110224 |
| Abcc3         | 0.68041944 | Dync1li2      | -0.72090196 |
| Col1a2        | 0.6802864  | Accs          | -0.72074174 |
| Pld2          | 0.68002414 | Tdp2          | -0.720696   |
| Plod1         | 0.68001556 | Glp1r         | -0.72049808 |
| Stard5        | 0.679945   | Nfat5         | -0.7201328  |
| Akap1         | 0.67991352 | Zfp62         | -0.72003316 |
| Pygb          | 0.6798372  | H2-K2         | -0.71998072 |
| Nckap5l       | 0.6798277  | Gpld1         | -0.7198801  |
| D2Bwg0886e    | 0.6797452  | Nup153        | -0.71975756 |
| Rcor1         | 0.6796379  | Ubr1          | -0.7196088  |
| Shpk          | 0.679584   | Gsk3b         | -0.7194295  |
| Gm33104       | 0.67945528 | lpo8          | -0.71929454 |
| Tmem179       | 0.6793976  | Gm13315       | -0.7192302  |
| 4932411N23Rik | 0.67937232 | Parp4         | -0.7191224  |
| Spata17       | 0.67919492 | Ranbp2        | -0.71897554 |
| Gsto1         | 0.67919016 | Arhgap12      | -0.71890688 |
| Slc9a1        | 0.67902994 | Zfp318        | -0.7184167  |
| BE949265      | 0.67893076 | Nae1          | -0.71812486 |
| Gm15217       | 0.67888116 | Calcoco1      | -0.7178192  |
| Wdr13         | 0.67885708 | Gm4737        | -0.7177892  |
| Mroh3         | 0.6787996  | Gm4907        | -0.71778346 |
| Mecp2         | 0.67874288 | 4932438A13Rik | -0.7177298  |
| 0610010K14Rik | 0.678637   | Pik3r1        | -0.71762896 |

|               |            |              |             |
|---------------|------------|--------------|-------------|
| Gpr52         | 0.6786251  | Gucd1        | -0.71739244 |
| Mrps36        | 0.6785126  | Klf10        | -0.7173066  |
| Magi2         | 0.67844868 | Mettl6       | -0.71715308 |
| Bbs9          | 0.6783042  | Atp8b1       | -0.71638536 |
| Zfp553        | 0.6780212  | Wnt7a        | -0.71618032 |
| Nwd2          | 0.6779542  | Phxr1        | -0.71613408 |
| Zbtb7c        | 0.67764234 | Arfip1       | -0.71583032 |
| Mlana         | 0.6774788  | Cep63        | -0.71579552 |
| Zfp846        | 0.67735528 | Skap2        | -0.71547174 |
| Aebp1         | 0.67732668 | Bsnd         | -0.7152624  |
| Olf809        | 0.67721892 | Pdk1         | -0.71511126 |
| Nprl3         | 0.67687606 | Cnot3        | -0.71497726 |
| Rian          | 0.6768522  | Atf7         | -0.7148938  |
| 6820426E19Rik | 0.67626334 | Phf23        | -0.71485568 |
| Fbxw2         | 0.67625236 | Ppcdc        | -0.71470166 |
| Gkn3          | 0.6761651  | Otud4        | -0.71463776 |
| Ifi47         | 0.67611456 | Pax5         | -0.7145753  |
| Eya1          | 0.67597056 | Faxc         | -0.71456004 |
| Gm26777       | 0.67579936 | Zfp341       | -0.714551   |
| Capg          | 0.6755395  | Osgin2       | -0.71455    |
| Olf1197       | 0.67549944 | Zbtb20       | -0.7145386  |
| Khdrbs1       | 0.67538786 | Zdhhc21      | -0.71427488 |
| BC017158      | 0.67521954 | Esyt1        | -0.71378612 |
| Rnf212        | 0.67495156 | Pgk1         | -0.71370746 |
| Cacna1b       | 0.67491532 | Klhl12       | -0.71300888 |
| Luc7l2        | 0.6748321  | Foxn3        | -0.71290206 |
| Dhx33         | 0.674736   | Herpud2      | -0.71284246 |
| Ccdc15        | 0.6745682  | Npepps       | -0.71262694 |
| Atp9a         | 0.6743264  | Ndfip2       | -0.7125788  |
| Hipk4         | 0.67432212 | Exd2         | -0.71253776 |
| Cracr2b       | 0.6741271  | Rtn4ip1      | -0.7120328  |
| C230057M02Rik | 0.67401266 | Klf5         | -0.71188354 |
| Gm8801        | 0.67399836 | Gak          | -0.71174764 |
| Pdlim7        | 0.6735554  | Cebpg        | -0.71164274 |
| Dcst1         | 0.67317152 | Tm9sf1       | -0.711514   |
| Adamts20      | 0.67290736 | LOC105245970 | -0.71149254 |
| Tmem26        | 0.6727624  | Sgms2        | -0.71148252 |
| Dcst2         | 0.67276    | Gramd1a      | -0.71118928 |
| Ubap2l        | 0.6726146  | Map2k5       | -0.710104   |

|               |            |               |             |
|---------------|------------|---------------|-------------|
| Exog          | 0.6725502  | Pkn1          | -0.71002532 |
| Car10         | 0.6724882  | Tmem203       | -0.70979166 |
| A930018P22Rik | 0.6724763  | Tmem55b       | -0.70961524 |
| Cphx1         | 0.67242432 | Ccdc6         | -0.70940256 |
| C87499        | 0.6721549  | Gm11110       | -0.70924472 |
| Cdkal1        | 0.672122   | Cxxc1         | -0.70901536 |
| Hira          | 0.6720586  | Appl1         | -0.7089343  |
| Ass1          | 0.67154836 | Snrpn         | -0.70878792 |
| Cdhr4         | 0.67125892 | Cldn6         | -0.7087245  |
| Gm4984        | 0.6707134  | Rab11fip3     | -0.70841408 |
| Sesn3         | 0.6703448  | Slc25a45      | -0.708405   |
| Tm6sf1        | 0.67031526 | Hist1h2bm     | -0.70804834 |
| Gm32854       | 0.6701703  | 1700069L16Rik | -0.707952   |
| Cdk5          | 0.6698022  | Polg          | -0.7076826  |
| Kat2b         | 0.6697488  | 2210018M11Rik | -0.7073574  |
| Sh3glb2       | 0.66954373 | Fam58b        | -0.7069478  |
| Deptor        | 0.66935492 | Acvr2a        | -0.7064214  |
| Zfp346        | 0.6691029  | Cadm1         | -0.70639468 |
| Junb          | 0.66909314 | Tmpo          | -0.70626164 |
| Kif24         | 0.66882228 | Mecom         | -0.7060628  |
| Mafa          | 0.66874074 | Calm2         | -0.70590162 |
| B930078G14Rik | 0.6685853  | Usp11         | -0.705626   |
| Mapk13        | 0.6684966  | Vps9d1        | -0.70556592 |
| Gbf1          | 0.66840934 | Xbp1          | -0.7055316  |
| Sf3a1         | 0.66831636 | Avl9          | -0.70524884 |
| Caprin1       | 0.6682968  | Rdm1          | -0.7050953  |
| Pigq          | 0.668067   | Asap2         | -0.7050767  |
| Lcn12         | 0.66799784 | Glis2         | -0.70501852 |
| Mpzl1         | 0.6677947  | Matr3         | -0.7048912  |
| Lhfpl1        | 0.66771746 | Fam57a        | -0.70484972 |
| Slc25a23      | 0.6677103  | Egr1          | -0.70442628 |
| Etv5          | 0.66765786 | Gpr161        | -0.70437146 |
| Gm8232        | 0.66762232 | Dhx38         | -0.70435572 |
| Fxyd6         | 0.66758872 | Tctex1d1      | -0.7043452  |
| Zbtb7c        | 0.6670842  | Brd7          | -0.7043314  |
| Supv3l1       | 0.66704416 | Wdr83         | -0.7040458  |
| Tmbim4        | 0.66679333 | 6430411K18Rik | -0.70390796 |
| Otub2         | 0.66669154 | Gabpb1        | -0.7036128  |
| Smpd1         | 0.66662454 | Apbb3         | -0.70354032 |



|               |            |               |             |
|---------------|------------|---------------|-------------|
| Bpifa1        | 0.66651774 | Uvssa         | -0.70324134 |
| Cgn           | 0.66642808 | Anp32a        | -0.70293473 |
| Agap3         | 0.66635656 | Gna13         | -0.7028613  |
| Ece1          | 0.66606808 | Skil          | -0.70285224 |
| Tinf2         | 0.66598082 | Cd3e          | -0.7027173  |
| Vprbp         | 0.66556692 | Epb4.1l5      | -0.70260096 |
| Plxnd1        | 0.66547584 | Nfil3         | -0.7025914  |
| 1810008l18Rik | 0.6652136  | Gm40177       | -0.70248126 |
| Neu1          | 0.66502714 | Irf2bp2       | -0.70215368 |
| Cby1          | 0.66475129 | Ankrd13c      | -0.7021384  |
| Slc41a3       | 0.6642704  | Tmem245       | -0.70203376 |
| Gm561         | 0.66412496 | B230118H07Rik | -0.70203256 |
| Atp6v0c       | 0.66402388 | Rhobtb1       | -0.70193244 |
| Txn2          | 0.6639371  | Al597479      | -0.70186614 |
| Lrrc28        | 0.6634345  | Rbak          | -0.7018466  |
| Mal2          | 0.66337824 | Yod1          | -0.7015548  |
| Prrx2         | 0.663259   | Nrp1          | -0.70141364 |
| Ube2m         | 0.6629944  | 4930455G09Rik | -0.70125246 |
| Sf3a2         | 0.66291904 | Arfgap3       | -0.70112372 |
| Gm16026       | 0.66277886 | Acsbg1        | -0.70101308 |
| Olfir821      | 0.66267586 | A830080D01Rik | -0.70091296 |
| Tlcd1         | 0.6625743  | Crlf3         | -0.70079708 |
| Helz          | 0.66251111 | Rest          | -0.70070314 |
| Mrpl54        | 0.66249228 | Sun1          | -0.7004776  |
| Eftud1        | 0.66231536 | Sesn1         | -0.7004447  |
| Pmf1          | 0.66225576 | Gm17769       | -0.70034576 |
| Nagk          | 0.66199231 | Sugp1         | -0.70018006 |
| Slfn8         | 0.66197634 | Hnrnpa1       | -0.70011472 |
| Gm35593       | 0.6611986  | Dyrk1a        | -0.69997644 |
| Zfp414        | 0.6611104  | Chic2         | -0.699944   |
| Alg14         | 0.66107726 | Cox16         | -0.69990444 |
| Kbtbd2        | 0.66083    | Jmjd1c        | -0.69985676 |
| Cops6         | 0.6608238  | Micall1       | -0.69967986 |
| Rnaseh2b      | 0.66066456 | Pnpla8        | -0.6996293  |
| Krr1          | 0.66050864 | Uri1          | -0.6995878  |
| Klk1b9        | 0.6603546  | Afg3l1        | -0.6989794  |
| 4933434E20Rik | 0.6603446  | Dicer1        | -0.69894886 |
| Xrcc5         | 0.66026544 | Galnt7        | -0.69888688 |
| Taf1b         | 0.6602216  | Lmbrd2        | -0.6984968  |

|               |            |               |             |
|---------------|------------|---------------|-------------|
| Coro7         | 0.66014432 | Csnk1a1       | -0.69845772 |
| Rbmx          | 0.65995884 | 0610037L13Rik | -0.69836188 |
| Tspan11       | 0.65988803 | Tmem89        | -0.6983576  |
| Npy1r         | 0.65983104 | Sorbs3        | -0.6981411  |
| 4933417G07Rik | 0.65980816 | Ppm1n         | -0.69807457 |
| Cd247         | 0.6597991  | Pard3         | -0.6978712  |
| Gm1661        | 0.6594496  | Nmd3          | -0.6978688  |
| Trmt61b       | 0.65941716 | Pgd           | -0.6978116  |
| Adal          | 0.65923834 | Mtss1         | -0.69779872 |
| Zfp827        | 0.65923024 | 6720475J19Rik | -0.69762612 |
| Psmc3         | 0.6591878  | Rgs2          | -0.69740724 |
| Gm33800       | 0.6590004  | Slc25a51      | -0.6973319  |
| 1700003F12Rik | 0.6588502  | Tshz2         | -0.69726324 |
| BC037034      | 0.6587677  | Ninj2         | -0.6971588  |
| Npr3          | 0.65875673 | Zbtb2         | -0.69710206 |
| Acox1         | 0.65859652 | Ncor1         | -0.696887   |
| D830005E20Rik | 0.6582141  | Taf4a         | -0.6967001  |
| Bmp1          | 0.658134   | Gfpt1         | -0.69638634 |
| Slc14a2       | 0.65786696 | Spin1         | -0.696331   |
| Sepn1         | 0.657774   | Mtmr3         | -0.696089   |
| 0610010K14Rik | 0.65736628 | Cep170b       | -0.6953912  |
| Kif1bp        | 0.6573396  | Numbl         | -0.69526816 |
| Ankrd13d      | 0.65719556 | Dhps          | -0.6952238  |
| Gm19710       | 0.65712214 | Zkscan3       | -0.69492388 |
| Gm10779       | 0.65685534 | Tgs1          | -0.69482804 |
| Slc6a8        | 0.6565895  | Chmp3         | -0.6947627  |
| Fam69c        | 0.6564708  | Myh10         | -0.6946137  |
| Abhd16a       | 0.6563492  | 2610029K11Rik | -0.69459272 |
| 9130011E15Rik | 0.65620994 | Trim24        | -0.6943016  |
| Zfp46         | 0.6561012  | Gm5039        | -0.6941595  |
| 1700049E22Rik | 0.65604544 | Ankrd24       | -0.693861   |
| Mink1         | 0.6558356  | Abcb1a        | -0.69354248 |
| Olfr1198      | 0.65499496 | Crebl2        | -0.6935029  |
| Tmem253       | 0.654706   | Zfp429        | -0.69345403 |
| Utrn          | 0.6546416  | Nek7          | -0.69329452 |
| Nudt19        | 0.65437316 | Cyp2c67       | -0.69320488 |
| Atg2b         | 0.65422392 | Poldip2       | -0.6931796  |
| Gas6          | 0.65383434 | Hacd1         | -0.69305944 |
| Tnnt2         | 0.6536727  | Slc19a1       | -0.69280196 |

|               |            |               |             |
|---------------|------------|---------------|-------------|
| Olf482        | 0.653667   | Gm5136        | -0.69247674 |
| H2-T22        | 0.65362692 | Ccdc40        | -0.692472   |
| Gm19966       | 0.653532   | Rere          | -0.6921649  |
| 9430078K24Rik | 0.65347624 | Usp3          | -0.69203806 |
| Rbm38         | 0.65334416 | Supt16        | -0.69168472 |
| Gm38398       | 0.65319728 | Rint1         | -0.69164514 |
| Atp6v1a       | 0.6529317  | 2010107G23Rik | -0.69119168 |
| Gm34014       | 0.65250636 | Tomm70a       | -0.6911378  |
| Trp73         | 0.65226746 | Mib1          | -0.69110156 |
| Tysnd1        | 0.65222644 | Abi1          | -0.69089984 |
| Mest          | 0.6520977  | 2610001J05Rik | -0.6908736  |
| Olf373        | 0.65208388 | Ier3          | -0.69084024 |
| Tradd         | 0.65202952 | Nfasc         | -0.6907425  |
| Pnpla1        | 0.652019   | Npepps        | -0.69068146 |
| Klk11         | 0.65199804 | Gm16253       | -0.69034052 |
| Cmtm8         | 0.65171958 | Rad50         | -0.690269   |
| Sdr42e1       | 0.65140248 | Aebp2         | -0.6902647  |
| Slc39a13      | 0.65137244 | Rbbp6         | -0.69004632 |
| Rock2         | 0.65120458 | Lrrc14b       | -0.690011   |
| Mink1         | 0.65116644 | Pcbp3         | -0.68989276 |
| Adrbk1        | 0.65109492 | Nin           | -0.6898494  |
| Gm3264        | 0.65097476 | Epb4.1        | -0.6895962  |
| Nkiras1       | 0.65089368 | Tnfsf15       | -0.68925906 |
| Rhobtb3       | 0.65085412 | Snx27         | -0.6891494  |
| Sstr5         | 0.65083552 | Cwc27         | -0.68896628 |
| Lppr3         | 0.65074872 | Cdc42se1      | -0.68891048 |
| Gm16499       | 0.6506386  | Pxn           | -0.68890286 |
| Med19         | 0.6506095  | Tango2        | -0.6886127  |
| Fcer2a        | 0.65058303 | Sart3         | -0.68850946 |
| Hps6          | 0.6503477  | Ddit4         | -0.68829202 |
| Myof          | 0.65025712 | Hilpda        | -0.68829012 |
| Nup93         | 0.65023374 | Mycbp2        | -0.68776082 |
| Eno3          | 0.65018224 | Mtmr1         | -0.68774844 |
| Sqrdl         | 0.65015506 | Phf8          | -0.68773794 |
| Nbea          | 0.6501136  | Kmt2c         | -0.68767786 |
| 1700020L24Rik | 0.6499934  | Ltbp3         | -0.6875596  |
| Vmn2r4        | 0.6498914  | Camsap1       | -0.68713904 |
| Dpagt1        | 0.64985752 | Masp2         | -0.6868949  |
| Ptov1         | 0.6498194  | Cdc42bpg      | -0.6866605  |

|               |            |               |             |
|---------------|------------|---------------|-------------|
| Dusp14        | 0.6496253  | Tap1          | -0.68648196 |
| Adgrf4        | 0.64960528 | Arl3          | -0.6863594  |
| Gm9112        | 0.64952588 | Ppp6r3        | -0.6862216  |
| Otx2          | 0.64924764 | Tm2d1         | -0.68614912 |
| Ccdc124       | 0.64916754 | Ei24          | -0.686049   |
| AW492981      | 0.649004   | 5031439G07Rik | -0.6859727  |
| Gml           | 0.6487422  | Gnas          | -0.68575192 |
| Gm9933        | 0.6486888  | Errfi1        | -0.68542146 |
| Fam98a        | 0.64859152 | Rbm45         | -0.68540334 |
| Mettl20       | 0.64856887 | Nemf          | -0.68534756 |
| Pdlim7        | 0.64847612 | Dppa5a        | -0.685266   |
| Chchd3        | 0.6483574  | Spred1        | -0.6851878  |
| Crnde         | 0.6483178  | Exoc6b        | -0.68500328 |
| Elov5         | 0.6483059  | Bet1l         | -0.6846938  |
| Zfp457        | 0.64826584 | Taf1d         | -0.68447423 |
| Adamts15      | 0.64814996 | Ppp2ca        | -0.6841569  |
| Cacna2d2      | 0.64809273 | 9030025P20Rik | -0.68393205 |
| Setd1b        | 0.6479502  | Tmem230       | -0.68391324 |
| LOC102634429  | 0.64792346 | Stx12         | -0.683897   |
| Mtl5          | 0.647892   | Zbtb18        | -0.68377734 |
| Bad           | 0.6478467  | Myo1d         | -0.68363714 |
| Gm10674       | 0.6478076  | 1600012H06Rik | -0.68362046 |
| LOC102641621  | 0.64765788 | Peak1         | -0.68351316 |
| Igdcc3        | 0.6476345  | Sec22a        | -0.68322896 |
| Usp39         | 0.6474595  | Cdc73         | -0.68281126 |
| Nipsnap1      | 0.6474154  | Fam46a        | -0.6826911  |
| 3110070M22Rik | 0.64722991 | Med23         | -0.68262386 |
| Rgs17         | 0.6471939  | Son           | -0.68232584 |
| Zfp568        | 0.6471524  | Ivd           | -0.68204546 |
| Ggnbp1        | 0.64714098 | Sap130        | -0.6820278  |
| Gm5751        | 0.64710092 | Ralgds        | -0.6818657  |
| M1ap          | 0.6470251  | Gm4221        | -0.68184519 |
| Spidr         | 0.64681626 | Kif13b        | -0.6816726  |
| Ptcd2         | 0.6467433  | Gxylt1        | -0.6815834  |
| Vamp1         | 0.64666604 | Atp6v1h       | -0.6811676  |
| Olf374        | 0.6461892  | Zc3h12c       | -0.68108464 |
| Dact2         | 0.64594888 | Sytl1         | -0.68098688 |
| Celf3         | 0.64586974 | Cdc42se2      | -0.68091106 |
| 1700034H15Rik | 0.64551544 | Ppp1r21       | -0.6807661  |

|               |            |               |             |
|---------------|------------|---------------|-------------|
| Tubb6         | 0.64547396 | Bnip3l        | -0.68062354 |
| A730017L22Rik | 0.64512348 | Ptpn2         | -0.6803584  |
| Gm16861       | 0.64446544 | Trit1         | -0.6802654  |
| Tmem151a      | 0.6442628  | Stxbp3-ps     | -0.68020964 |
| C330021F23Rik | 0.64417314 | Ccdc127       | -0.68014812 |
| Gm12472       | 0.64388156 | Fam204a       | -0.68013716 |
| Wnk2          | 0.64386416 | Reep4         | -0.680006   |
| Ikzf4         | 0.64385604 | Brsk2         | -0.67977    |
| Pira6         | 0.64380074 | Pvr           | -0.6797576  |
| Mgat5b        | 0.64360093 | Trim34b       | -0.67973756 |
| Tpgs2         | 0.6435411  | Akap7         | -0.67971086 |
| Fbxl19        | 0.6434436  | Nupl1         | -0.67969466 |
| Akap11        | 0.6433692  | Pkn2          | -0.67967892 |
| Cnm4          | 0.64320374 | Pdk1          | -0.67964792 |
| Mybpc3        | 0.64318848 | Chd2          | -0.67962884 |
| Col11a2       | 0.64318466 | Myo9b         | -0.67945146 |
| Ndufaf6       | 0.6431074  | Fbxw2         | -0.67943526 |
| Adam15        | 0.64279986 | Il3ra         | -0.67930604 |
| Hpn           | 0.64278316 | Tmbim4        | -0.67888904 |
| Atp6v0e       | 0.64268112 | Arap3         | -0.678849   |
| 1700030J22Rik | 0.6426773  | Irgq          | -0.6787696  |
| E130119H09Rik | 0.6425438  | Gtpbp3        | -0.67847634 |
| Thap3         | 0.64219094 | Cnot10        | -0.67839288 |
| Nudt5         | 0.6421094  | Gm20420       | -0.67827272 |
| ErbB4         | 0.64205312 | AU022252      | -0.67826652 |
| Irx6          | 0.6417241  | Phka2         | -0.67814517 |
| 4930438E09Rik | 0.64164066 | Tbl1xr1       | -0.67809486 |
| Nck2          | 0.641562   | Herpud2       | -0.67807436 |
| Abhd17a       | 0.64148092 | Ccser2        | -0.67763614 |
| Pold2         | 0.64147616 | Por           | -0.67747832 |
| Rdh1          | 0.64140653 | Ndst1         | -0.67740964 |
| Lrmp          | 0.641376   | 2310030G06Rik | -0.6773548  |
| 1700021L22Rik | 0.64133716 | Stk-ps1       | -0.67712997 |
| 4933406I18Rik | 0.64119292 | Erdr1         | -0.67708158 |
| Rbm5          | 0.64105176 | Egflam        | -0.6769867  |
| Ntn3          | 0.64101624 | 1700080E11Rik | -0.6769743  |
| Krt80         | 0.6409769  | Cbwd1         | -0.6768942  |
| Gm4971        | 0.64091874 | Urb2          | -0.6767373  |
| Gm20752       | 0.64075756 | Pnpla8        | -0.67671632 |

|               |            |         |             |
|---------------|------------|---------|-------------|
| Poc5          | 0.64072752 | Setd3   | -0.67648577 |
| Pcnxl3        | 0.64068746 | Atp5a1  | -0.67594576 |
| Rgs20         | 0.64064408 | Gm5069  | -0.67594004 |
| Sirt7         | 0.64048814 | Tef     | -0.6759114  |
| Cyp2r1        | 0.64043856 | Ptpn13  | -0.6756458  |
| Cdk6          | 0.6402917  | Arrb1   | -0.6750455  |
| Hapln3        | 0.6401062  | Aldh1a1 | -0.6747241  |
| Gga2          | 0.63988638 | Sdc1    | -0.67458724 |
| Dpp4          | 0.63973808 | Fmr1    | -0.67417812 |
| Olfr1402      | 0.63963604 | Gabpa   | -0.67373086 |
| Mlxipl        | 0.63948107 | B4galt7 | -0.6736753  |
| Cops5         | 0.6392827  | Arl6    | -0.67351008 |
| Ugt1a6b       | 0.63919974 | Ypel3   | -0.67346048 |
| Atp2b1        | 0.6386504  | Dnajc7  | -0.6733818  |
| lfrd2         | 0.63864994 | Gtpbp3  | -0.67305946 |
| Gm29949       | 0.63859034 | Ttc39a  | -0.67297172 |
| Fasn          | 0.63851548 | Ilf2    | -0.67278194 |
| Lce3d         | 0.63798714 | Hibadh  | -0.6727109  |
| 1700113A16Rik | 0.6377027  | Lpp     | -0.672524   |
| Slc11a2       | 0.6376972  | Itgb1   | -0.67232276 |
| Aebp2         | 0.63765096 | Prkar2a | -0.672317   |
| Tlr2          | 0.6376338  | Agpat9  | -0.67220688 |
| D5Ertd579e    | 0.6375599  | Wipi2   | -0.6717887  |
| A630095N17Rik | 0.63755274 | Amn1    | -0.67163848 |
| Cacna1i       | 0.63728952 | Cul3    | -0.6716342  |
| Mpp1          | 0.63701152 | Tet3    | -0.6716013  |
| Gm34780       | 0.63675452 | Hdlbp   | -0.67149043 |
| Gnptg         | 0.63663244 | Gigyf1  | -0.6714058  |
| Urah          | 0.63661432 | Bzw1    | -0.67140054 |
| Npb           | 0.6364708  | Cyb5r1  | -0.67139792 |
| Dlk2          | 0.6358714  | Smc5    | -0.6712799  |
| Gm16023       | 0.6355567  | Tmem245 | -0.67115188 |
| Retn          | 0.6355195  | Eno1b   | -0.67092466 |
| Fgd1          | 0.63548232 | Vps4a   | -0.67086076 |
| Glmf          | 0.63537312 | Mtss1   | -0.67084026 |
| lqsec1        | 0.6351638  | Pmm1    | -0.67073632 |
| Tarsl2        | 0.63506032 | Tmc8    | -0.6707072  |
| Kif19a        | 0.6349988  | Zfp617  | -0.67053556 |
| 1110006E14Rik | 0.6349788  | Rnf44   | -0.67025614 |

|               |            |               |             |
|---------------|------------|---------------|-------------|
| Cdkal1        | 0.63476086 | Nat6          | -0.67004824 |
| Ubr4          | 0.6345601  | Nf1           | -0.66998672 |
| C330018D20Rik | 0.63451766 | Dnmt3a        | -0.66976928 |
| Uhrf1         | 0.63445044 | Mfsd4         | -0.6694722  |
| Lpl           | 0.63434768 | Ccdc167       | -0.6688552  |
| Dcun1d3       | 0.6343255  | Fam160a2      | -0.6688366  |
| Tmem208       | 0.6343088  | Akap9         | -0.66861916 |
| Gm19782       | 0.63423586 | Rpl7          | -0.6684642  |
| Cpne7         | 0.63419676 | Tgif1         | -0.66810274 |
| Ccdc169       | 0.6341944  | Tgif1         | -0.66805124 |
| Rbm19         | 0.63406706 | Ddx20         | -0.66792488 |
| Prdm11        | 0.63392544 | 6330564D18Rik | -0.66789532 |
| Zfand1        | 0.63382292 | Fbxl12        | -0.6676822  |
| Wash1         | 0.63377714 | Kdm2b         | -0.66743088 |
| Pomgnt1       | 0.63364554 | Sec22c        | -0.66734648 |
| Rabep2        | 0.63364028 | Mapkapk2      | -0.66733264 |
| Fzr1          | 0.6335702  | Zzz3          | -0.6672168  |
| Zscan4d       | 0.6335628  | Chmp4c        | -0.66716528 |
| Prl3a1        | 0.63335704 | Hist1h4d      | -0.66714526 |
| Fkbp4         | 0.63334656 | LOC102638888  | -0.66712808 |
| Murc          | 0.63303136 | Uxs1          | -0.66689206 |
| Tuba1b        | 0.63301897 | Lysmd4        | -0.66688824 |
| Atcay         | 0.6326952  | Bglap         | -0.6667242  |
| Krt79         | 0.63262796 | Zfp426        | -0.6665783  |
| Casz1         | 0.6326256  | Ddit3         | -0.66653014 |
| Nxn           | 0.63246536 | Fam118b       | -0.6665063  |
| 9530053A07Rik | 0.63241768 | Socs3         | -0.6663308  |
| Zfp60         | 0.6323986  | Vcl           | -0.6661582  |
| Trpt1         | 0.63209486 | Arl3          | -0.6660428  |
| 4930525G20Rik | 0.63194704 | Rpgrip1       | -0.66597224 |
| Bmp4          | 0.63194084 | Tnfaip8       | -0.66594816 |
| Gmn           | 0.63191032 | Kif16b        | -0.665905   |
| Osbpl5        | 0.63179874 | Tubgcp4       | -0.66554308 |
| Timm44        | 0.6316905  | AU040320      | -0.66530752 |
| Tbc1d10a      | 0.6316838  | Ccdc92        | -0.66518546 |
| Vangl2        | 0.63168192 | Phf3          | -0.6651373  |
| Lix1l         | 0.63161326 | Tatdn1        | -0.66491508 |
| Sh3bgrl3      | 0.6313777  | Gstt2         | -0.66487694 |
| Rrp7a         | 0.63128472 | Ncoa3         | -0.66471004 |

|               |            |          |             |
|---------------|------------|----------|-------------|
| Hmgn1         | 0.63118744 | Snx25    | -0.66470956 |
| Heatr5a       | 0.6309476  | Tgfbrap1 | -0.66465616 |
| 1700029P11Rik | 0.6308274  | Hist1h4k | -0.66449404 |
| Olf1148       | 0.63069296 | Dmtf1    | -0.66440726 |
| Grid2ip       | 0.63048696 | Ppp2r2a  | -0.66423034 |
| Scn8a         | 0.63047696 | Maml3    | -0.6639309  |
| Tns3          | 0.630466   | Gng12    | -0.66390132 |
| BC030867      | 0.6304493  | H2-L     | -0.66388368 |
| AY761184      | 0.630393   | Dab2ip   | -0.663857   |
| Ncstn         | 0.63035012 | Nsmce2   | -0.66379214 |
| Onecut2       | 0.6303277  | Sbno1    | -0.6635928  |
| Mrpl42        | 0.6302252  | Zfp622   | -0.66337776 |
| Olf1426       | 0.63018704 | Katna1   | -0.663147   |
| Fam57b        | 0.63014984 | ldh1     | -0.6628442  |
| Rpp30         | 0.6297741  | Bod1l    | -0.6627307  |
| Slc6a4        | 0.62949132 | Tmub2    | -0.66268874 |
| Mon1a         | 0.62935496 | Phc2     | -0.66259574 |
| Six3          | 0.62927104 | Ccar2    | -0.66248608 |
| Smco4         | 0.62897396 | Rhobtb1  | -0.66247416 |
| Commd5        | 0.6288619  | Ccdc30   | -0.66245532 |
| Brd9          | 0.62875366 | Arsg     | -0.662395   |
| Capns1        | 0.6285176  | Wdr75    | -0.6623168  |
| Rab43         | 0.6283016  | Rab28    | -0.66226816 |
| 9330159M07Rik | 0.62819624 | Phf2     | -0.66220046 |
| Itfg2         | 0.62814426 | Baz1a    | -0.66220046 |
| Irx3os        | 0.62803506 | Xpo7     | -0.66187906 |
| 6330408A02Rik | 0.62788724 | Gm20389  | -0.6618724  |
| Pias1         | 0.6278479  | Trim33   | -0.66177846 |
| Pmvk          | 0.62759352 | Thumpd3  | -0.66136646 |
| Plekhb2       | 0.62750674 | Rsu1     | -0.66131926 |
| Elk3          | 0.62711    | Rnmt     | -0.6609216  |
| Gas2l1        | 0.627089   | Pitpnc1  | -0.6607652  |
| Ap5z1         | 0.627048   | lpmk     | -0.6604433  |
| Rita1         | 0.62695694 | Prpf4    | -0.6603632  |
| Pou2f1        | 0.62662936 | Exosc7   | -0.66029644 |
| Traf5         | 0.62660862 | Rbpj     | -0.6602621  |
| Nkx2-6        | 0.62638712 | Larp4b   | -0.66023588 |
| Stip1         | 0.62599564 | Ralgps2  | -0.6601682  |
| Rlim          | 0.62563754 | Dgkq     | -0.66015624 |



|               |            |               |             |
|---------------|------------|---------------|-------------|
| Mrps25        | 0.6256299  | Wasl          | -0.6601424  |
| Gramd1b       | 0.62548208 | Ing4          | -0.66010952 |
| Ssh1          | 0.6254492  | Cnot1         | -0.66010904 |
| Apbb2         | 0.6253953  | Ccdc43        | -0.65996694 |
| Zeb2          | 0.6253767  | Coq10b        | -0.65991784 |
| Vmn2r60       | 0.62505866 | Man2a1        | -0.65984488 |
| Cfap46        | 0.62502432 | Kansl1l       | -0.65960454 |
| 4933417O13Rik | 0.62489748 | Shb           | -0.6595626  |
| Nprl3         | 0.6247382  | Hn1           | -0.65939044 |
| Il4ra         | 0.62468387 | Grsf1         | -0.65903426 |
| Khdc1c        | 0.6244426  | Dxo           | -0.6588912  |
| Trim71        | 0.62436532 | Csnk1g1       | -0.65868568 |
| 4930565D16Rik | 0.6242702  | Tmem125       | -0.6586466  |
| Gm9648        | 0.62408114 | Abce1         | -0.6586232  |
| Ezh2          | 0.62407804 | 2610034E01Rik | -0.65858984 |
| Ahnak         | 0.62406016 | Kpna3         | -0.6584468  |
| Arfgef2       | 0.62385464 | Eda2r         | -0.65840936 |
| Bmp10         | 0.62381696 | Chd6          | -0.65829516 |
| Nrap          | 0.6237798  | C230091D08Rik | -0.65788556 |
| Epb4.1l2      | 0.62367296 | Hspa5         | -0.65775347 |
| Gm3317        | 0.62362052 | Qtrt1         | -0.65756368 |
| Ambra1        | 0.6235435  | Scmh1         | -0.6575303  |
| 4930524O05Rik | 0.6233964  | Arhgap17      | -0.65732    |
| Olfra481      | 0.6232953  | Il22ra1       | -0.657269   |
| E2f7          | 0.62307692 | Htra2         | -0.65716552 |
| Efcab12       | 0.62307214 | Epb4.1l3      | -0.65703964 |
| Pop4          | 0.6229105  | Rbm39         | -0.6570096  |
| Ocel1         | 0.62262392 | Psmc9         | -0.65664816 |
| Mut           | 0.6225662  | Nanp          | -0.65626336 |
| Fam217a       | 0.62253    | Prdm2         | -0.65606928 |
| Gm19583       | 0.6222706  | Per2          | -0.6558318  |
| Cdh16         | 0.62225676 | Rxrb          | -0.6557951  |
| Pon1          | 0.62210846 | Cast          | -0.65566135 |
| Lmna          | 0.6220355  | Tcp1l1l       | -0.65562486 |
| Apmap         | 0.6219926  | Wnk4          | -0.65545226 |
| Ndufa3        | 0.62186956 | Ralgds        | -0.65534592 |
| Sptbn1        | 0.6218424  | Fra10ac1      | -0.65525436 |
| Mospd2        | 0.62183666 | Itch          | -0.6550164  |
| LOC102634683  | 0.62167788 | Rbak          | -0.65499926 |

|               |            |               |             |
|---------------|------------|---------------|-------------|
| Lars2         | 0.62161016 | C130068B02Rik | -0.6549554  |
| Lrp4          | 0.62155008 | Thoc2         | -0.6548667  |
| Taf12         | 0.6212764  | Rbm27         | -0.65481568 |
| Csrp2         | 0.62105036 | Hist1h4d      | -0.65471696 |
| Zfp937        | 0.62099028 | Stag1         | -0.6546321  |
| Tfpt          | 0.62091446 | Scaf8         | -0.6545124  |
| Ccnf          | 0.6209073  | Zbtb33        | -0.65398026 |
| 5031425F14Rik | 0.6207366  | Wnt9a         | -0.65394688 |
| 4931402H11Rik | 0.62051154 | Hist1h2ba     | -0.653934   |
| Tprn          | 0.6205034  | Fam179b       | -0.6539192  |
| Hes6          | 0.6203532  | Dnajc21       | -0.6538768  |
| B3gat1        | 0.62028312 | Firre         | -0.6538048  |
| 4833415N18Rik | 0.61986208 | Arap2         | -0.6535678  |
| Zfp511        | 0.61982536 | Pqlc1         | -0.6535573  |
| Gm13021       | 0.6194358  | Sez6l         | -0.65337514 |
| Cdc16         | 0.61915588 | Trafd1        | -0.653203   |
| Mmp19         | 0.6191058  | Rlf           | -0.6531606  |
| Slc44a5       | 0.619102   | Gm34786       | -0.65307664 |
| Rasa4         | 0.61881686 | Ggct          | -0.65303708 |
| Ube2l6        | 0.6186662  | Brd7          | -0.65298224 |
| Adk           | 0.61857366 | Gmds          | -0.65279866 |
| Gm35678       | 0.61854888 | Smad5         | -0.65241336 |
| Plscr3        | 0.618464   | Ythdf2        | -0.6523862  |
| Fnbp1         | 0.6184473  | Ppie          | -0.65224815 |
| Slc15a2       | 0.61832094 | Klf3          | -0.65219832 |
| Nwd1          | 0.6182723  | Bbs12         | -0.6521864  |
| Hdac10        | 0.618104   | Proser1       | -0.65177726 |
| Cxx1c         | 0.6179471  | Grhl2         | -0.6517544  |
| Mal           | 0.61781024 | Pigb          | -0.65165472 |
| Rab1b         | 0.61765432 | Leprot        | -0.6514225  |
|               | 1-Mar      | Pkd2          | -0.65137816 |
| Swsap1        | 0.61762286 | Gpbp1         | -0.65133906 |
| Htatip2       | 0.61762094 | Taf6          | -0.6510534  |
| Nop56         | 0.61755848 | Mast4         | -0.65090274 |
| Aif1l         | 0.61755228 | Arih1         | -0.6508708  |
| Cd151         | 0.61747932 | Fam114a2      | -0.65065574 |
| Olfm3         | 0.61744546 | Ccdc58        | -0.6505456  |
| Ccdc67        | 0.61739016 | Otud7b        | -0.65052128 |
| Sema3a        | 0.61723804 | Acbd5         | -0.65025664 |

|               |            |          |                 |
|---------------|------------|----------|-----------------|
| Pycr1         | 0.6168308  | Gpi1     | -0.65000487     |
| Prickle3      | 0.6166408  | Phf3     | -0.64991        |
| Rabep1        | 0.61656952 | Sh2b3    | -0.64965296     |
| Fzr1          | 0.61645364 | Stk24    | -0.64956904     |
| Piezo1        | 0.61605454 | Atp6v1b2 | -0.64930487     |
| Gm7207        | 0.61600828 | Nfx1     | -0.64924144     |
| Srrd          | 0.61593056 | Eri3     | -0.64907456     |
| Lrrc61        | 0.61590528 | Dand5    | -0.6490736      |
| Xntrpc        | 0.61582136 | Ttc38    | -0.64903926     |
| Gabrp         | 0.61520052 | Aqp8     | -0.64903926     |
| Ecsit         | 0.61482    | Dnajb6   | -0.64894008     |
| Mmp24         | 0.6146784  | Tmtc3    | -0.64827824     |
| 2310067B10Rik | 0.6146536  | Zbtb7a   | -0.64827014     |
| E130309D02Rik | 0.61460828 | Gm30551  | -0.64826584     |
| Tapbp         | 0.61454058 | Tbc1d10b | -0.64822244     |
| Cks2          | 0.61452532 | Plcx1    | -0.64813328     |
| Lrrc48        | 0.61450814 | Commd1   | -0.64813232     |
| Cdon          | 0.61439896 | Aldh3a2  | -0.64811992     |
| Lamtor4       | 0.61435366 | Cbfb     | -0.648087       |
| Siglec1       | 0.61433435 |          | 8-Mar -0.647882 |
| Zfp444        | 0.6141658  | Hbp1     | -0.647841       |
| 4930512M02Rik | 0.61393881 | Ppm1l    | -0.64782524     |
| Gja5          | 0.61380768 | Plg      | -0.6475754      |
| Slurp1        | 0.61377906 | Eif2ak3  | -0.6473651      |
| Dlx3          | 0.6137128  | Setd5    | -0.6472454      |
| Casp8         | 0.61351728 | Zfp866   | -0.647182       |
| Bche          | 0.61350728 | Slc25a36 | -0.6471338      |
| Wars          | 0.61348534 | Map4k5   | -0.6470022      |
| C730014E05Rik | 0.61344386 | Aldh2    | -0.64690494     |
| Abca5         | 0.6134186  | Armcx2   | -0.64667416     |
| Ppan          | 0.6132989  | Sugp2    | -0.64660788     |
| Gm10406       | 0.6132493  | Zdhhc20  | -0.64660216     |
| Fam46c        | 0.6131158  | Naa30    | -0.6464634      |
| Coq7          | 0.61300374 | Alkbh5   | -0.6460185      |
| Rab31         | 0.61283494 | Ccdc14   | -0.64589166     |
| Vmn1r219      | 0.6127238  | Bptf     | -0.645874       |
| 4833419F23Rik | 0.61240054 | Snx10    | -0.64563656     |
| Gm5914        | 0.61221694 | Gm29073  | -0.6455064      |
| Emc10         | 0.6121354  | Ptpn14   | -0.64534426     |

|               |            |               |             |
|---------------|------------|---------------|-------------|
| Gramd3        | 0.6114416  | Slc35g1       | -0.64523316 |
| Elavl3        | 0.61142396 | Ppap2c        | -0.64522886 |
| Lmo4          | 0.611341   | Trp53rka      | -0.64503956 |
| Fscn3         | 0.61133814 | Klc1          | -0.64491892 |
| Heatr6        | 0.61130952 | Rbbp6         | -0.64473772 |
| Ryr1          | 0.6111584  | Ostf1         | -0.64468146 |
| 4930429D17Rik | 0.6110544  | Crebbp        | -0.64453888 |
| Suds3         | 0.611001   | Ino80d        | -0.64452934 |
| Gm15614       | 0.61074496 | Mkx           | -0.64438104 |
| Tmem14c       | 0.61062288 | A430105I19Rik | -0.64437866 |
| Polr2k        | 0.61050653 | Bbc3          | -0.6441598  |
| Prss48        | 0.61028624 | Anxa11        | -0.6441474  |
| Cacng8        | 0.6100416  | Kdm1a         | -0.64414454 |
| Cytip         | 0.60996008 | Fdx1          | -0.6440978  |
| Ppfia4        | 0.60982132 | Hmgcl         | -0.6440234  |
| Atp6ap1       | 0.6093488  | 2010111I01Rik | -0.64400912 |
| Syt2          | 0.609323   | Olfr398       | -0.64389992 |
| Timeless      | 0.6091504  | Ddx17         | -0.64387846 |
| Nup205        | 0.60897874 | Ergic2        | -0.64380312 |
| Ube2f         | 0.60896396 | Nup37         | -0.64357614 |
| Rab5c         | 0.60887384 | B4galt5       | -0.6433854  |
| Vmn1r139      | 0.6087339  | Tbc1d20       | -0.6433463  |
| Gm32464       | 0.60872746 | Prrc2c        | -0.64328528 |
| Espnl         | 0.608448   | Rbm25         | -0.64312934 |
| Psmg4         | 0.6084318  | Ppp1cc        | -0.64282084 |
| Rbm48         | 0.60800744 | Kctd13        | -0.64248132 |
| Mtx1          | 0.60793352 | 4930512B01Rik | -0.642467   |
| Stampb        | 0.6078572  | Zfp36         | -0.6423049  |
| Nsf           | 0.60773516 | Ccdc92        | -0.6422987  |
| Lmna          | 0.60764266 | Nf1           | -0.64228083 |
| Swap70        | 0.60758162 | Ttl           | -0.6421218  |
| Dcaf4         | 0.60745216 | Fastkd1       | -0.64211464 |
| Tns2          | 0.60741806 | Mturn         | -0.6419244  |
| Fig4          | 0.60719132 | C030034L19Rik | -0.6415081  |
| Hps1          | 0.60708666 | Zfp160        | -0.64149714 |
| Aars2         | 0.60707426 | Cebpb         | -0.6414952  |
| Uba7          | 0.6070628  | Gapdh         | -0.64094592 |
| Gm19327       | 0.60680532 | 2610015P09Rik | -0.64053536 |
| Lgals3bp      | 0.60680056 | Zmym2         | -0.6405268  |

|               |            |               |             |
|---------------|------------|---------------|-------------|
| Cd74          | 0.60664606 | Eogt          | -0.64042616 |
| Olfr1218      | 0.6066451  | Fosl2         | -0.64042186 |
| Rpusd3        | 0.60639716 | Glce          | -0.64024734 |
| Pclo          | 0.60627746 | Fitm2         | -0.64009572 |
| Baiap2        | 0.60622836 | Dync1i2       | -0.640038   |
| Gpr180        | 0.60619354 | 9530077C05Rik | -0.63982106 |
| Neu2          | 0.60609674 | Cldn9         | -0.6396508  |
| Sh3bp5        | 0.60599136 | Pex5          | -0.63932944 |
| Hmgn5         | 0.60589886 | Tgfbr1        | -0.63888932 |
| Ebp           | 0.60570526 | Arhgef2       | -0.63882256 |
| Emc6          | 0.60560274 | Bsg           | -0.63876487 |
| Vps29         | 0.6055174  | BC003331      | -0.6384878  |
| Rictor        | 0.6054802  | Esrp1         | -0.63841772 |
| Jakmip1       | 0.60547448 | Fam60a        | -0.63825894 |
| BC106175      | 0.60544372 | Kmt2e         | -0.6378789  |
| Atg10         | 0.60535574 | Ptpmt1        | -0.6377158  |
| 4930449C09Rik | 0.60526276 | Erbp3         | -0.63745546 |
| Mthfr         | 0.60515214 | Arrdc3        | -0.637413   |
| Fam120aos     | 0.6050978  | Ccar1         | -0.6372194  |
| Tm9sf1        | 0.60496712 | Ttc33         | -0.63708066 |
| Fam216a       | 0.6048126  | Ubxn2a        | -0.6369381  |
| 4922502B01Rik | 0.6046896  | P2rx4         | -0.6369262  |
| Ccnd3         | 0.60468912 | Zfp503        | -0.63677406 |
| Ptgr2         | 0.60459232 | Fam168b       | -0.63630056 |
| Ldlr          | 0.60414076 | Snrk          | -0.63628292 |
| Zscan25       | 0.60388612 | Bbx           | -0.63623714 |
| Bcl7c         | 0.60380172 | Sbf1          | -0.63622808 |
| lqce          | 0.60379696 | Rest          | -0.63601064 |
| Abca17        | 0.6037898  | Tfb2m         | -0.6358094  |
| Gnptab        | 0.60378266 | Erp29         | -0.63577986 |
| Psmb8         | 0.60372734 | Map2k4        | -0.6356702  |
| 4930442J19Rik | 0.60365248 | Wtap          | -0.63542604 |
| Sms           | 0.60346794 | Elmo3         | -0.6353946  |
| Pold1         | 0.603467   | Zswim4        | -0.63533688 |
| Acap3         | 0.6034627  | Nr1d1         | -0.63528824 |
| Psmc2         | 0.6033349  | Osbpl1a       | -0.635211   |
| Alad          | 0.60333204 | Bmpr1a        | -0.63517094 |
| Ushbp1        | 0.60331344 | Suv420h1      | -0.6350069  |
| Gm34093       | 0.60323334 | Vwa1          | -0.63471388 |

|               |            |               |             |
|---------------|------------|---------------|-------------|
| Igkv4-72      | 0.60317564 | Mpzl3         | -0.6344962  |
| Pcnp          | 0.60313034 | Gm35778       | -0.63443708 |
| 9130011E15Rik | 0.60281276 | Snx16         | -0.634429   |
| Jph4          | 0.6026969  | Hnrnpul1      | -0.6341858  |
| Gm2696        | 0.60251092 | Paqr5         | -0.63417244 |
| Ccl25         | 0.60228872 | Ift52         | -0.63393688 |
| 1810030O07Rik | 0.60226012 | Fggy          | -0.63390112 |
| Rbms1         | 0.60221004 | Tjp2          | -0.6337886  |
| Sh3glb2       | 0.60220956 | Gm9872        | -0.6337347  |
| Stradb        | 0.60198736 | Shoc2         | -0.6336818  |
| Zfp688        | 0.6019218  | Ccdc117       | -0.63354206 |
| Gm32117       | 0.6016836  | Rnf130        | -0.63317417 |
| Scgb3a1       | 0.6014528  | Zfp710        | -0.6330905  |
| Gm20125       | 0.60126448 | Arhgap29      | -0.6330738  |
| Haus1         | 0.60122966 | Zbtb14        | -0.633008   |
| Gpr149        | 0.6009841  | Gm4876        | -0.63300514 |
| Cd80          | 0.6005306  | Ddx31         | -0.6328678  |
| Dexi          | 0.60044528 | R3hdm1        | -0.6328492  |
| Gm17296       | 0.6003566  | Hprt          | -0.63268804 |
| Stag2         | 0.59992742 | Zc3h11a       | -0.63262272 |
| Sqrdl         | 0.59991694 | Pigb          | -0.6321578  |
| C76332        | 0.59986972 | Hsph1         | -0.63205576 |
| Foxp3         | 0.59986926 | Nabp1         | -0.63190794 |
| A130014A01Rik | 0.59974766 | Hist1h2ao     | -0.63179446 |
| Gm16524       | 0.59958506 | Atxn7l3b      | -0.63176108 |
| D930028M14Rik | 0.5994582  | Dnttip1       | -0.6315236  |
| 9030417H13Rik | 0.59937048 | Tmem131       | -0.6313286  |
| Scml4         | 0.5993514  | Calm2         | -0.6310668  |
| Slc44a2       | 0.5992055  | Pitpnm1       | -0.63085794 |
| Slc5a8        | 0.59913492 | Ankrd11       | -0.6307764  |
| Drd2          | 0.59882688 | Fam214b       | -0.63074732 |
| LOC102634852  | 0.5988078  | Osmr          | -0.6307092  |
| Clcn7         | 0.59874796 | Fgfr3         | -0.63035346 |
| Exoc5         | 0.5987215  | Bcl2l1        | -0.63023234 |
| Gm6287        | 0.59871244 | Ube2q2        | -0.63022376 |
| Golga3        | 0.59863568 | Mtss1         | -0.63021326 |
| Nt5c          | 0.59846736 | Dgcr2         | -0.630208   |
| Csnk2b        | 0.5984435  | Tnfrsf4       | -0.63017464 |
| Hs1bp3        | 0.59836864 | 4930453N24Rik | -0.63003588 |

|               |            |               |             |
|---------------|------------|---------------|-------------|
| Gabbr1        | 0.5982709  | Rpa1          | -0.62992526 |
| Klhl40        | 0.59826804 | Pnpo          | -0.62968444 |
| B430319G15Rik | 0.59818435 | Mms19         | -0.62967492 |
| Selm          | 0.59806966 | Parp6         | -0.6290684  |
| 5430431A17Rik | 0.59806014 | Pfdn2         | -0.62899256 |
| Ndufaf4       | 0.598032   | Dnajc14       | -0.6286459  |
| Gm41496       | 0.5980234  | Trim34a       | -0.6285224  |
| Syt15         | 0.5979252  | Sema4d        | -0.6281934  |
| Ccnd2         | 0.59786892 | Rab23         | -0.62814044 |
| Lpo           | 0.59771966 | Slc25a32      | -0.62798548 |
| Vasn          | 0.59748412 | Gtf2a1        | -0.62797452 |
| Nccrp1        | 0.5974741  | Med15         | -0.62785912 |
| Ict1          | 0.59745168 | Cdh24         | -0.6277945  |
| Cp            | 0.59742594 | Homer1        | -0.62756872 |
| Metap1d       | 0.5973344  | Chd7          | -0.62744712 |
| Gm10845       | 0.5973258  | Zbtb20        | -0.6272836  |
| Mrpl48        | 0.59730196 | Plcx2         | -0.62689256 |
| Bsn           | 0.59719134 | Mybph         | -0.62673257 |
| Lpl           | 0.5970712  | Arl4a         | -0.62669516 |
| Faim2         | 0.59706926 | Gatad1        | -0.6264038  |
| 4930556J02Rik | 0.59695148 | Rnf11         | -0.62639    |
| Mycbp         | 0.59686852 | Lnp           | -0.62630414 |
| C3            | 0.5968518  | Cdc42         | -0.62624454 |
| Thoc5         | 0.5968466  | Ppip5k2       | -0.6262207  |
| Gm4117        | 0.596745   | Trmt61a       | -0.6260886  |
| Fcho1         | 0.59669494 | Sun1          | -0.62606288 |
| Defa2         | 0.5966706  | Gm36022       | -0.62597228 |
| Wdfy3         | 0.5966406  | B630005N14Rik | -0.62591886 |
| Vmn2r111      | 0.59631586 | Kif21a        | -0.6258788  |
| Cldn20        | 0.5962486  | Cep57l1       | -0.62533808 |
| Rab1b         | 0.5962324  | Pggt1b        | -0.62531376 |
| Cox19         | 0.5961461  | Senp7         | -0.62525606 |
| Slc18a3       | 0.59613276 | Ythdc1        | -0.62513208 |
| Npb           | 0.5960803  | Mmadhc        | -0.62480592 |
| Robo4         | 0.59598828 | Setd1b        | -0.62447166 |
| Ifi27l2a      | 0.59588933 | Mark4         | -0.62437726 |
| 8430428J23Rik | 0.595783   | Serpinb1c     | -0.62434626 |
| Slc35a4       | 0.5955086  | Slc25a46      | -0.62425232 |
| 4930430M16Rik | 0.5954528  | H2afy3        | -0.62393808 |

|               |            |               |             |
|---------------|------------|---------------|-------------|
| Rwdd4a        | 0.5953455  | Hnrnpa0       | -0.62393426 |
| Pid1          | 0.59527874 | Hspb8         | -0.62385988 |
| Ccl5          | 0.59513568 | Hltf          | -0.62381268 |
| Nrros         | 0.59506677 | Msl1          | -0.6237607  |
| Fadd          | 0.59482908 | Prkra         | -0.62372876 |
| 1700030J22Rik | 0.59482312 | Cited2        | -0.62356376 |
| Pfkfb2        | 0.59479046 | Mga           | -0.62349654 |
| Cops6         | 0.5947032  | Pitpnm2       | -0.62344884 |
| Otof          | 0.59451914 | Fam175b       | -0.62333774 |
| Rab11fip4os1  | 0.5944638  | Fxr2          | -0.6226158  |
| Tgm2          | 0.5943265  | Mtpap         | -0.62258768 |
| Oraov1        | 0.5942664  | Hspa5         | -0.6225133  |
| Vamp5         | 0.59425116 | Rnaseh1       | -0.62250209 |
| BC024978      | 0.5942359  | Cdc123        | -0.621871   |
| A230050P20Rik | 0.59422636 | Gm14431       | -0.6217699  |
| Fosl1         | 0.59401416 | Ank3          | -0.6216631  |
| Tmem229b      | 0.5939145  | Itga6         | -0.6211138  |
| LOC102641570  | 0.59367084 | Minpp1        | -0.62099456 |
| Nrarp         | 0.5936494  | 2410127L17Rik | -0.62096166 |
| Gm21286       | 0.5936012  | Rpph1         | -0.6209507  |
| Rnasel        | 0.59359026 | Dusp1         | -0.62093974 |
| Wars          | 0.59358454 | Fsbp          | -0.62089872 |
| Ipcef1        | 0.59352016 | Vamp4         | -0.6204915  |
| Ube2c         | 0.5933986  | Olfml2b       | -0.6204729  |
| Phf12         | 0.59336234 | Fam160a2      | -0.62030744 |
| Cep162        | 0.59308004 | Dcaf10        | -0.6203065  |
| Uncx          | 0.59268426 | Ank3          | -0.62027096 |
| Nol11         | 0.59251404 | Eif4g1        | -0.62024308 |
| Aagab         | 0.59249592 | Pdpk1         | -0.6202202  |
| Gm33224       | 0.59239912 | Spag9         | -0.61996508 |
| Cyp2j6        | 0.59239626 | Arhgef2       | -0.61989736 |
| Rcn1          | 0.59231996 | Zkscan1       | -0.6198368  |
| Smarcal1      | 0.5919986  | Braf          | -0.61947728 |
| Cald1         | 0.59189176 | Gtf3c1        | -0.61940288 |
| Gm5124        | 0.5918822  | Galnt1        | -0.61929894 |
| Oscar         | 0.59184694 | Slc25a37      | -0.6191945  |
| Morc2a        | 0.5918164  | Rbm47         | -0.6191306  |
| Dnajc14       | 0.59173727 | Aurka         | -0.6189656  |
| Topors        | 0.5916872  | Selt          | -0.618865   |



|               |            |             |             |
|---------------|------------|-------------|-------------|
| Dhx34         | 0.59167814 | Ssfa2       | -0.618834   |
| A530032D15Rik | 0.5914731  | Kdm4c       | -0.61878586 |
| Tmem201       | 0.59143114 | Eci2        | -0.61874246 |
| Pxt1          | 0.5913534  | Pdcd10      | -0.6185436  |
| Hemk1         | 0.5913358  | Frk         | -0.61853266 |
| D830039M14Rik | 0.59127616 | Nrbf2       | -0.61852264 |
| Gm11959       | 0.591259   | Tbc1d19     | -0.6184592  |
| Gm36320       | 0.5912452  | Rps12       | -0.61838294 |
| Zfp608        | 0.59107876 | Fam73a      | -0.6183486  |
| Ndufs7        | 0.59087228 | Hnrnpc      | -0.61826563 |
| 1700011H14Rik | 0.59084773 | Erbp2ip     | -0.61811686 |
| Kcnip1        | 0.5907836  | BC046401    | -0.61803054 |
| Phf1          | 0.5907731  | Itsn1       | -0.61785794 |
| Abcg4         | 0.59063864 | Rgmb        | -0.61756015 |
| Wbp2          | 0.59063482 | Epb4.1l4aos | -0.6175504  |
| Gspt1         | 0.5905137  | Zfp217      | -0.6174798  |
| Krtap9-1      | 0.5903888  | Aqp6        | -0.61746836 |
| Gm4884        | 0.59035348 | Eef1e1      | -0.6173892  |
| Lrrc75a       | 0.590322   | Rbm12       | -0.61737632 |
| Lhb           | 0.59030294 | Adam33      | -0.61736036 |
| Mob1b         | 0.59025812 | Acot4       | -0.61725044 |
| A430106G13Rik | 0.59024668 | Krt81       | -0.61722994 |
| Cep250        | 0.5900202  | Per1        | -0.6171198  |
| Ccdc155       | 0.58995676 | Gm5092      | -0.61700534 |
| Olf123        | 0.5897422  | Prdm2       | -0.61690044 |
| Lman1l        | 0.58957672 | Plekha5     | -0.6168809  |
| Naglu         | 0.58950376 | Lpin3       | -0.61681796 |
| Pusl1         | 0.58941556 | Arfgef1     | -0.61661196 |
| Tuba3a        | 0.5891881  | Map3k10     | -0.61660814 |
| Ctsw          | 0.5889473  | Tmem229a    | -0.61656284 |
| Ctnnd1        | 0.5889468  | Sncg        | -0.6165142  |
| Nabp2         | 0.58893252 | Nxt2        | -0.6164684  |
| Bcl10         | 0.58892108 | Irf2bp2     | -0.61635828 |
| L1Md-Tf29     | 0.58870936 | Paics       | -0.6162944  |
| Lrp3          | 0.58845854 | Nif3l1      | -0.6159997  |
| Vmn2r3        | 0.5882044  | Mia3        | -0.61598874 |
| Ptpn14        | 0.58819008 | Scg5        | -0.61596108 |
| Zc3h3         | 0.58802366 | Atxn1       | -0.61580372 |
| Gle1          | 0.58795596 | Pycr2       | -0.6157422  |

|         |            |               |             |
|---------|------------|---------------|-------------|
| Syne1   | 0.5879216  | Ythdf3        | -0.61539746 |
| Ctrcos  | 0.58791732 | Gm10386       | -0.61505126 |
| Elavl4  | 0.58789396 | Stard3        | -0.6149268  |
| Gm28321 | 0.58787488 | Tars2         | -0.61476136 |
| H2afy   | 0.58784008 | Tpd52l2       | -0.614748   |
| Ttll5   | 0.58753968 | Aaed1         | -0.6147151  |
| Ensa    | 0.58740568 | Zc3h7a        | -0.6145358  |
| Cmip    | 0.58734012 | Arv1          | -0.61417914 |
| Gcm2    | 0.5871248  | Ppp1r15b      | -0.6141305  |
| Eef2kmt | 0.5870657  | Nipsnap3b     | -0.6137824  |
| Cnot3   | 0.58687592 | Wdr64         | -0.61375    |
| Gm20756 | 0.58673524 | Rab6a         | -0.6135106  |
| Unc93a  | 0.58670234 | Gm12128       | -0.61337804 |
| Mboat7  | 0.58668088 | Ptbp2         | -0.6133342  |
| Kctd2   | 0.58655787 | Insr          | -0.61320114 |
| Gm32031 | 0.586535   | Strn3         | -0.61310434 |
| Nrip1   | 0.5864148  | Gpi1          | -0.6130805  |
| Miat    | 0.58639288 | 1110019B22Rik | -0.61306048 |
| Ssmem1  | 0.58638048 | Ndfip1        | -0.61302232 |
| Olfr287 | 0.58622884 | Nelfe         | -0.6129694  |
| Ctxn2   | 0.58612204 | Vasp          | -0.6129117  |
| Dclk3   | 0.58607603 | Fam135a       | -0.61289834 |
| Bspry   | 0.58601808 | Golga4        | -0.61283064 |
| Gm6116  | 0.58597136 | Pik3cb        | -0.6128216  |
| Gm38522 | 0.5858531  | Atp11b        | -0.61281252 |
| Dhodh   | 0.58569146 | Rnf125        | -0.6127982  |
| Cox5a   | 0.58555556 | Larp4         | -0.61256074 |
| Lhx8    | 0.5851774  | Srsf2         | -0.6122198  |
| Fbxo6   | 0.5851469  | Ppox          | -0.61206674 |
| Gm9926  | 0.5851078  | Auh           | -0.61187911 |
| Ptcd3   | 0.58491516 | Srp68         | -0.61165286 |
| Myh4    | 0.58476114 | Hist1h2bb     | -0.6115546  |
| Acd     | 0.5847292  | Lrp6          | -0.61118794 |
| Npat    | 0.58453656 | Tmem168       | -0.61112834 |
| Gm32474 | 0.58449172 | Rad54l2       | -0.61049318 |
| Gm14488 | 0.58447504 | Tlcd2         | -0.6104522  |
| Ephb6   | 0.5843134  | Drg2          | -0.61033964 |
| Cdh22   | 0.58413648 | Ncoa2         | -0.61014176 |
| Dbi     | 0.58411168 | Stat5a        | -0.60978412 |

|               |            |               |                 |
|---------------|------------|---------------|-----------------|
| Slc25a4       | 0.58391524 | Sugt1         | -0.60974264     |
| Sympk         | 0.5837722  | Ggnbp2        | -0.60971736     |
| Ercc6l2       | 0.5836806  | Scrn3         | -0.60941554     |
| Ccbe1         | 0.5835252  | Dync1li1      | -0.60934926     |
| Svep1         | 0.58346366 | Ppm1a         | -0.60912084     |
| Ribc1         | 0.5834012  | Hnrnph3       | -0.60895396     |
| Mecom         | 0.5833516  | Clcn3         | -0.60860634     |
| Kctd13        | 0.58314848 | Kat8          | -0.60842466     |
| Gm9777        | 0.58309268 | Thap7         | -0.6083422      |
| Tbata         | 0.5830257  |               | 2-Sep -0.608336 |
| Myo18a        | 0.5826273  | Nrp1          | -0.60832024     |
| Entpd4        | 0.58251906 | Pate2         | -0.60831428     |
| Slirp         | 0.5824666  | Gapdh         | -0.60807752     |
| Mogat2        | 0.58231568 | Ears2         | -0.60805583     |
| Pmvk          | 0.5820465  | Shc1          | -0.60795928     |
| Cmtm5         | 0.5817194  | Spata13       | -0.6078348      |
| Cracr2b       | 0.58161164 | Hist2h4       | -0.6077571      |
| Dnajc15       | 0.5813594  | Aaed1         | -0.60771226     |
| Bhmt          | 0.58127212 | Wdr89         | -0.60755229     |
| 4933417D19Rik | 0.58125805 | Rheb          | -0.60743666     |
| Ptpn6         | 0.58122826 | Kctd12b       | -0.6072612      |
| Tanc1         | 0.5811658  | H3f3a         | -0.60722352     |
| Ppp1r2        | 0.5810952  | Rhou          | -0.6071887      |
| Kcnq1         | 0.580987   | 4930402H24Rik | -0.60712814     |
| Oscar         | 0.58093572 | Serpinb1a     | -0.6067071      |
| Tom1          | 0.58084392 | Polk          | -0.60665226     |
| Olf149        | 0.58067894 | Rtn4          | -0.60617018     |
| Psg29         | 0.58034754 | Ppid          | -0.60610819     |
| Ttn           | 0.58030892 | Arl4c         | -0.6055436      |
| Abtb1         | 0.58018636 | Pank3         | -0.60550166     |
| Gm4098        | 0.58017492 | Micu3         | -0.60531092     |
| Capn12        | 0.580163   | Cstf3         | -0.60528756     |
|               |            | Itch          | -0.60519456     |
|               |            | Pex13         | -0.6051564      |
|               |            | Foxk1         | -0.60482646     |
|               |            | Ahcyl1        | -0.60469532     |
|               |            | Exosc3        | -0.60465002     |
|               |            | Npy           | -0.60462808     |
|               |            | Zdhhc16       | -0.6042595      |

|               |             |
|---------------|-------------|
| 2900076A07Rik | -0.6041312  |
| Nap1l1        | -0.60368776 |
| Mthfsd        | -0.6036644  |
| Prss53        | -0.60359096 |
| Atg101        | -0.60352564 |
| Wasf2         | -0.60333204 |
| Serinc1       | -0.6027398  |
| Phyhd1        | -0.60273648 |
| Use1          | -0.60242986 |
| Tmem87a       | -0.6022005  |
| Mrm1          | -0.6020222  |
| Zc3hc1        | -0.6019814  |
| Farp1         | -0.60186816 |
| Tatdn2        | -0.60163736 |
| Pcbp4         | -0.60161924 |
| Zfx           | -0.6015892  |
| Pcbp4         | -0.6014056  |
| Mcf2          | -0.60124064 |
| Esrp2         | -0.60122586 |
| Ercc3         | -0.60120726 |
| Ppp1r13b      | -0.60100746 |
| Jade1         | -0.60088444 |
| Lxn           | -0.60079814 |
| Polr2h        | -0.60067892 |
| Cox11         | -0.6005683  |
| Ewsr1         | -0.60043716 |
| Rasgef1a      | -0.60040236 |
| AI790442      | -0.60027266 |
| Clip1         | -0.60018348 |
| Selo          | -0.60006332 |
| Etv3          | -0.60004186 |
| Tmem39b       | -0.59968234 |
| Adcy6         | -0.59965848 |
| Prcc          | -0.5995674  |
| Lnx1          | -0.59937048 |
| Smc2          | -0.59933614 |
| Slc26a10      | -0.599318   |
| Map3k4        | -0.59918166 |
| Rasf          | -0.59916114 |

|          |             |
|----------|-------------|
| Zfp507   | -0.59900666 |
| Cftr     | -0.5983958  |
| Wasf3    | -0.59832455 |
| Ap3s1    | -0.5983243  |
| Junb     | -0.59821988 |
| Cradd    | -0.59792328 |
| Sft2d2   | -0.59791852 |
| Ywhag    | -0.59782933 |
| Phf13    | -0.59780264 |
| Metrn    | -0.5976491  |
| Prdm4    | -0.59761906 |
| Cyp20a1  | -0.59741306 |
| Arhgap5  | -0.59735108 |
| Ppp4r2   | -0.59719372 |
| Cblb     | -0.5966878  |
| Laptm4b  | -0.59661436 |
| Cyba     | -0.59661006 |
| Atp2a2   | -0.5965705  |
| Taf2     | -0.59638596 |
| Triap1   | -0.59626246 |
| Uhmk1    | -0.59605836 |
| Gm21992  | -0.59604884 |
| Ubxn2a   | -0.59591532 |
| Dbp      | -0.59570264 |
| Rufy2    | -0.59557748 |
| Gm31711  | -0.59552192 |
| Gnpat    | -0.5955038  |
| Crybb2   | -0.5950432  |
| Tmem179b | -0.59492492 |
| Dock9    | -0.5948682  |
| Pnpla2   | -0.5945258  |
| Iqca     | -0.594481   |
| Nudt21   | -0.59443712 |
| Perp     | -0.59440279 |
| Pisd     | -0.59423446 |
| Ibtk     | -0.59372854 |
| Jak2     | -0.5936732  |
| Nbn      | -0.59349204 |
| Tanc2    | -0.59337806 |

|          |             |
|----------|-------------|
| Zfp654   | -0.59326554 |
| Acp1     | -0.59317636 |
| Nudcd2   | -0.59306956 |
| Abcc8    | -0.59304835 |
| Vgll4    | -0.59300756 |
| Rbm39    | -0.59299516 |
| Crip2    | -0.59280444 |
| Srsf10   | -0.59278392 |
| Ifnar1   | -0.59274768 |
| Pick1    | -0.59269286 |
| Eif4ebp3 | -0.5925474  |
| Ube4b    | -0.592402   |
| Rapgef2  | -0.59228134 |
| Cd247    | -0.59219932 |
| Spon1    | -0.59203148 |
| Gm4737   | -0.59170674 |
| Akirin2  | -0.5914712  |
| Smad2    | -0.59142256 |
| Ank2     | -0.59139872 |
| Bub3     | -0.59134436 |
| Proser2  | -0.5913415  |
| Ppa2     | -0.59133386 |
| Hyi      | -0.59125804 |
| Ccnc     | -0.5911598  |
| Tax1bp1  | -0.5908694  |
| Xiap     | -0.59055352 |
| Trmt10c  | -0.5904169  |
| Hadhb    | -0.59012652 |
| Lman2    | -0.5894065  |
| Pex6     | -0.58937716 |
| Frmd8os  | -0.5893688  |
| Abcf3    | -0.58914328 |
| Zbtb7b   | -0.58899068 |
| Tab2     | -0.5885234  |
| Gsk3b    | -0.5882883  |
| Slc25a25 | -0.58820296 |
| Kansl3   | -0.5881944  |
| Dpm1     | -0.5881138  |
| Efnb1    | -0.58782196 |

|          |             |
|----------|-------------|
| Osbp19   | -0.58762788 |
| Slc6a6   | -0.58731508 |
| Krcc1    | -0.58727217 |
| Thop1    | -0.58718204 |
| Nrip2    | -0.58715605 |
| Ei24     | -0.5870099  |
| Gm10767  | -0.58695364 |
| Tpcn1    | -0.586905   |
| Cyb5d1   | -0.5868063  |
| Bace1    | -0.58679294 |
| Zfyve16  | -0.58667564 |
| Rnf19b   | -0.58638716 |
| Cdc42se2 | -0.58636666 |
| Btbd7    | -0.5862832  |
| Prkcd    | -0.58624792 |
| Mgea5    | -0.5861783  |
| Hmg20b   | -0.58617496 |
| Magi1    | -0.58609772 |
| Rasip1   | -0.58605194 |
| Rbm22    | -0.58603192 |
| Unc13a   | -0.5856662  |
| Fnbp4    | -0.58554124 |
| Sytl4    | -0.58528996 |
| Synj2    | -0.58527946 |
| Ldb1     | -0.58525514 |
| Gm8709   | -0.58511019 |
| Cpeb3    | -0.58510352 |
| Tmod1    | -0.58503628 |
| Psm5     | -0.58496428 |
| Rbbp9    | -0.58473206 |
| Eps15    | -0.58457326 |
| Adm2     | -0.58431196 |
| Cbr4     | -0.5843091  |
| Tardbp   | -0.58420754 |
| Sirt4    | -0.5841656  |
| Tom1l2   | -0.58413888 |
| Hepacam2 | -0.5839808  |
| Rpl36al  | -0.58392668 |
| Plekha5  | -0.58390092 |

|               |             |
|---------------|-------------|
| Ttc37         | -0.5837674  |
| U2surp        | -0.58364486 |
| Gm13238       | -0.58358908 |
| Nhsl1         | -0.5835066  |
| Afap1         | -0.58347368 |
| Larp1b        | -0.58347272 |
| Arf3          | -0.58324576 |
| Zak           | -0.5831561  |
| Cpxm1         | -0.5831275  |
| Dync1li2      | -0.58305884 |
| Eed           | -0.5830054  |
| Gm33790       | -0.58289624 |
| Ccdc136       | -0.58288384 |
| Fbxo3         | -0.58260012 |
| Leprotl1      | -0.5824461  |
| Gm34786       | -0.58241988 |
| Mbd3l1        | -0.58238244 |
| Aco1          | -0.5823388  |
| Gm38488       | -0.58224726 |
| Lamc1         | -0.5821352  |
| Reep3         | -0.58201504 |
| Gm38448       | -0.5819192  |
| Arhgef2       | -0.5818777  |
| Zfp874a       | -0.58182574 |
| Pura          | -0.5813246  |
| Cep83         | -0.58093644 |
| Cript         | -0.58084726 |
| Krr1          | -0.58084607 |
| Usp10         | -0.58073877 |
| 0610009E02Rik | -0.5803952  |
| Gm14295       | -0.58024884 |
| Ctdsp2        | -0.58021688 |
| Dgcr8         | -0.5801358  |
| Eps15l1       | -0.58000516 |



**Supplemental Table 2: Significantly enriched mechanisms  
by pathway enrichment analysis of Gene Ontology**

| Term                                                                                            | Fold Enrichment | FDR      |
|-------------------------------------------------------------------------------------------------|-----------------|----------|
| GO:0006351~transcription, DNA-templated                                                         | 1.401768117     | 4.29E-22 |
| GO:0006355~regulation of transcription, DNA-templated                                           | 1.282915668     | 4.27E-13 |
| GO:0045944~positive regulation of transcription from<br>RNA polymerase II promoter              | 1.374946501     | 1.29E-08 |
| GO:0016310~phosphorylation                                                                      | 1.488145294     | 1.09E-08 |
| GO:0000122~negative regulation of transcription from<br>RNA polymerase II promoter              | 1.436971326     | 1.75E-08 |
| GO:0016569~covalent chromatin modification                                                      | 1.719273866     | 1.25E-07 |
| GO:0006468~protein phosphorylation                                                              | 1.45221904      | 6.11E-07 |
| GO:0007049~cell cycle                                                                           | 1.413270975     | 3.84E-06 |
| GO:0006357~regulation of transcription from<br>RNA polymerase II promoter                       | 1.506405042     | 1.04E-05 |
| GO:0006915~apoptotic process                                                                    | 1.385215525     | 9.22E-05 |
| GO:0001525~angiogenesis                                                                         | 1.602761904     | 1.64E-04 |
| GO:0006974~cellular response to DNA damage stimulus                                             | 1.433218043     | 2.75E-04 |
| GO:0048511~rhythmic process                                                                     | 1.801701659     | 5.83E-04 |
| GO:0045893~positive regulation of transcription,<br>DNA-templated                               | 1.343641915     | 9.82E-04 |
| GO:0015031~protein transport                                                                    | 1.333737921     | 0.001278 |
| GO:0043065~positive regulation of apoptotic process                                             | 1.446830697     | 0.001727 |
| GO:0035556~intracellular signal transduction                                                    | 1.397387592     | 0.002499 |
| GO:0048813~dendrite morphogenesis                                                               | 2.363446244     | 0.002539 |
| GO:0010628~positive regulation of gene expression                                               | 1.391093384     | 0.003163 |
| GO:0030336~negative regulation of cell migration                                                | 1.806887241     | 0.003219 |
| GO:0030335~positive regulation of cell migration                                                | 1.559659581     | 0.003517 |
| GO:0018105~peptidyl-serine phosphorylation                                                      | 1.645800623     | 0.016811 |
| GO:0016567~protein ubiquitination                                                               | 1.371311086     | 0.016975 |
| GO:0009749~response to glucose                                                                  | 1.854163202     | 0.021039 |
| GO:0010977~negative regulation of neuron projection<br>development                              | 1.95438824      | 0.020589 |
| GO:0009790~embryo development                                                                   | 1.830692782     | 0.026884 |
| GO:0030512~negative regulation of transforming growth<br>factor beta receptor signaling pathway | 2.02677299      | 0.027812 |
| GO:0006397~mRNA processing                                                                      | 1.371713485     | 0.03614  |
| GO:0030154~cell differentiation                                                                 | 1.227756715     | 0.038533 |
| GO:0006511~ubiquitin-dependent protein catabolic process                                        | 1.548281593     | 0.042934 |

GO:0034097~response to cytokine

1.785490491 0.041842

**Supplemental Table 3: List of single nucleotide variants detected by targeted sequence**

| Sample | Chr | Start | End      | Ref      | Alt | Func.refGene | Gene.refGene | ExonicFunc.refGene | depth                | variantNum |     |
|--------|-----|-------|----------|----------|-----|--------------|--------------|--------------------|----------------------|------------|-----|
| PDA_1  |     | 3     | 77638049 | 77638049 | G   | A            | exonic       | ROBO2              | nonsynonymous SNV    | 279        | 52  |
| PDA_1  |     | 12    | 25398285 | 25398285 | C   | G            | exonic       | KRAS               | nonsynonymous SNV    | 475        | 174 |
| PDA_1  |     | 17    | 7578190  | 7578190  | T   | C            | exonic       | TP53               | nonsynonymous SNV    | 196        | 54  |
| PDA_1  |     | 17    | 56435476 | 56435476 | C   | T            | exonic       | RNF43              | nonsynonymous SNV    | 73         | 5   |
| PDA_1  |     | 20    | 57484787 | 57484787 | T   | G            | exonic       | GNAS               | nonsynonymous SNV    | 290        | 49  |
| PDA_2  |     | 12    | 25398284 | 25398284 | C   | A            | exonic       | KRAS               | nonsynonymous SNV    | 318        | 117 |
| PDA_2  |     | 17    | 7577537  | 7577537  | C   | -            | exonic       | TP53               | frameshift deletion  | 336        | 107 |
| PDA_3  |     | 9     | 21971186 | 21971186 | G   | A            | exonic       | CDKN2A             | stopgain             | 135        | 52  |
| PDA_3  |     | 12    | 25398285 | 25398285 | C   | G            | exonic       | KRAS               | nonsynonymous SNV    | 563        | 257 |
| PDA_3  |     | 17    | 7578474  | 7578474  | -   | G            | exonic       | TP53               | frameshift insertion | 312        | 78  |
| PDA_3  |     | 17    | 8792115  | 8792115  | A   | T            | exonic       | PIK3R5             | nonsynonymous SNV    | 119        | 7   |
| PDA_4  |     | 3     | 30729962 | 30729962 | C   | -            | exonic       | TGFBR2             | frameshift deletion  | 571        | 94  |
| PDA_4  |     | 12    | 25398284 | 25398284 | C   | A            | exonic       | KRAS               | nonsynonymous SNV    | 439        | 68  |
| PDA_4  |     | 12    | 56488334 | 56488334 | C   | T            | exonic       | ERBB3              | nonsynonymous SNV    | 244        | 41  |
| PDA_4  |     | 17    | 7577548  | 7577548  | C   | A            | exonic       | TP53               | nonsynonymous SNV    | 258        | 48  |
| PDA_5  |     | 5     | 1.12E+08 | 1.12E+08 | C   | A            | exonic       | APC                | nonsynonymous SNV    | 414        | 38  |
| PDA_5  |     | 12    | 25398285 | 25398285 | C   | G            | exonic       | KRAS               | nonsynonymous SNV    | 603        | 259 |
| PDA_5  |     | 17    | 7578263  | 7578263  | G   | A            | exonic       | TP53               | stopgain             | 274        | 105 |
| PDA_5  |     | 17    | 7579542  | 7579542  | C   | G            | exonic       | TP53               | nonsynonymous SNV    | 265        | 59  |
| PDA_5  |     | 18    | 19752082 | 19752082 | A   | G            | exonic       | GATA6              | nonsynonymous SNV    | 231        | 23  |

**Supplemental Table 4: Primer sequence used for RT-PCR analysis**

|         | Fw                      | Rv                      |
|---------|-------------------------|-------------------------|
| Ptf1a   | TCCCATCCCCTTACTTTGATGA  | GTAGCAGTATTCGTGTAGCTGG  |
| Mist1   | GCTGACCGCCACCATACTTAC   | TGTGTAGAGTAGCGTTGCAGG   |
| Amy2a4  | TTGCCAAGGAATGTGAGCGAT   | CCAAGGTCTTGATGGGTTATGAA |
| Cpa1    | CAGTCTTCGGCAATGAGAACT   | GGGAAGGGCACTCGAACATC    |
| Nr5a2   | TGTGTGGCGATAAAGTGTCTG   | TCGACAGTAGGGACATCGTTT   |
| Sox9    | AGTACCCGCATCTGCACAAC    | ACGAAGGGTCTCTTCTCGCT    |
| Hnf1b   | GTTACTGCCGTCCCCGAATTT   | CGGCTTGGTGTGCGAGATCC    |
| Krt19   | GGGGGTTTCAGTACGCATTGG   | GAGGACGAGGTCACGAAGC     |
| Pdx1    | TTCCCGAATGGAACCGAGC     | GCGTGAGCTTTGGTGGATT     |
| Hes1    | ATAGCTCCCGGCATTCCAAG    | GCGCGGTATTTCCCAACA      |
| Gata4   | CCCTACCCAGCCTACATGG     | ACATATCGAGATTGGGGTGTCT  |
| Gata6   | TTGCTCCGGTAACAGCAGTG    | GTGGTCGCTTGTGTAGAAGGA   |
| Ngn3    | AGTGCTCAGTTCCAATTCCAC   | CGGCTTCTTCGCTTTTTTGCTG  |
| Brg1    | CAAAGACAAGCATATCCTAGCCA | CACGTAGTGTGTGTTAAGGACC  |
| Dll1    | CAGGACCTTCTTTTCGCGTATG  | AAGGGGAATCGGATGGGGTT    |
| Dll4    | TTCCAGGCAACCTTCTCCGA    | ACTGCCGCTATTCTTGTCCC    |
| Jag1    | CCTCGGGTCAGTTTGAGCTG    | CCTTGAGGCACACTTTGAAGTA  |
| Jag2    | CTGTGCAGCGTGTTTCAGTG    | GTGTCCACCATACGCAGATAAC  |
| Notch1  | GATGGCCTCAATGGGTACAAG   | TCGTTGTTGTTGATGTCACAGT  |
| Notch2  | ATGTGGACGAGTGTCTGTTGC   | GGAAGCATAGGCACAGTCATC   |
| Rbpj    | CTCCACCCAAACGACTCACTA   | TCCAACCACTGCCATAAGATA   |
| Onecut1 | GGCTATGCCACCCGACAAG     | GCCCTGAATTACTTCCATTGCT  |
